# Supplementary material for: Global scale variability of the mineral dust longwave refractive index: a new dataset of in situ measurements for climate modelling and remote sensing
Source: Copernicus journal article supplement (doi:10.5194/acp-2016-616), 2016-10-19
Supplement: Supplementary file 1 [file acp-2016-616-supplement.zip]

Archive with 20 entries (20 files):
- Supplementary_DiBiagio_ACPD/2015_ACPD_DiBiagio_Supplementary.pdf
- Supplementary_DiBiagio_ACPD/CRI_results_Algeria.txt
- Supplementary_DiBiagio_ACPD/CRI_results_Arizona.txt
- Supplementary_DiBiagio_ACPD/CRI_results_Atacama.txt
- Supplementary_DiBiagio_ACPD/CRI_results_Australia.txt
- Supplementary_DiBiagio_ACPD/CRI_results_Bodele.txt
- Supplementary_DiBiagio_ACPD/CRI_results_Ethiopia.txt
- Supplementary_DiBiagio_ACPD/CRI_results_Gobi.txt
- Supplementary_DiBiagio_ACPD/CRI_results_Kuwait.txt
- Supplementary_DiBiagio_ACPD/CRI_results_Libya.txt
- Supplementary_DiBiagio_ACPD/CRI_results_Mali.txt
- Supplementary_DiBiagio_ACPD/CRI_results_Mauritania.txt
- Supplementary_DiBiagio_ACPD/CRI_results_Morocco.txt
- Supplementary_DiBiagio_ACPD/CRI_results_Namib-1.txt
- Supplementary_DiBiagio_ACPD/CRI_results_Namib-2.txt
- Supplementary_DiBiagio_ACPD/CRI_results_Niger.txt
- Supplementary_DiBiagio_ACPD/CRI_results_Patagonia.txt
- Supplementary_DiBiagio_ACPD/CRI_results_SaudiArabia.txt
- Supplementary_DiBiagio_ACPD/CRI_results_Taklimakan.txt
- Supplementary_DiBiagio_ACPD/CRI_results_Tunisia.txt
