# Supplementary material for: Global scale variability of the mineral dust longwave refractive index: a new dataset of in situ measurements for climate modelling and remote sensing
Source: Copernicus journal article supplement (doi:10.5194/acp-2016-616), 2016-10-19
Supplement: Supplementary file 1 [file acp-2016-616-supplement.zip › Supplementary_DiBiagio_ACPD/CRI_results_Algeria.txt]

wavelength(microns)	real_part(n)	imaginary_part(k)	standard_deviation(n)	standard_deviation(k)
3.00	1.458	0.005	0.070	0.002
3.02	1.450	0.005	0.060	0.002
3.04	1.449	0.005	0.060	0.002
3.06	1.446	0.005	0.040	0.002
3.08	1.446	0.005	0.040	0.002
3.10	1.443	0.005	0.020	0.002
3.12	1.443	0.005	0.010	0.002
3.14	1.441	0.005	0.010	0.002
3.16	1.440	0.005	0.010	0.002
3.18	1.438	0.005	0.010	0.002
3.20	1.438	0.005	0.010	0.002
3.22	1.436	0.005	0.010	0.002
3.24	1.436	0.005	0.010	0.002
3.26	1.435	0.005	0.010	0.002
3.28	1.434	0.005	0.010	0.002
3.30	1.433	0.005	0.010	0.002
3.32	1.432	0.005	0.010	0.002
3.34	1.431	0.005	0.000	0.002
3.36	1.431	0.005	0.010	0.002
3.38	1.430	0.005	0.000	0.002
3.40	1.429	0.005	0.010	0.002
3.42	1.428	0.005	0.010	0.002
3.44	1.428	0.005	0.010	0.002
3.46	1.427	0.005	0.010	0.002
3.48	1.426	0.005	0.010	0.002
3.50	1.425	0.005	0.010	0.002
3.52	1.425	0.005	0.010	0.002
3.54	1.424	0.005	0.010	0.002
3.56	1.423	0.005	0.020	0.002
3.58	1.422	0.005	0.010	0.002
3.60	1.422	0.005	0.020	0.002
3.62	1.421	0.005	0.020	0.002
3.64	1.421	0.005	0.020	0.002
3.66	1.420	0.005	0.020	0.002
3.68	1.419	0.005	0.020	0.002
3.70	1.419	0.005	0.020	0.002
3.72	1.418	0.005	0.020	0.002
3.74	1.417	0.005	0.020	0.002
3.76	1.417	0.005	0.020	0.002
3.78	1.416	0.005	0.020	0.002
3.80	1.416	0.005	0.020	0.002
3.82	1.415	0.005	0.020	0.002
3.84	1.414	0.005	0.020	0.002
3.86	1.414	0.005	0.020	0.002
3.88	1.413	0.005	0.020	0.002
3.90	1.412	0.005	0.020	0.002
3.92	1.412	0.005	0.030	0.002
3.94	1.411	0.005	0.020	0.002
3.96	1.411	0.005	0.030	0.002
3.98	1.410	0.005	0.020	0.002
4.00	1.410	0.005	0.030	0.002
4.02	1.409	0.005	0.030	0.002
4.04	1.408	0.005	0.030	0.002
4.06	1.408	0.005	0.030	0.002
4.08	1.407	0.005	0.030	0.002
4.10	1.406	0.005	0.030	0.002
4.12	1.406	0.005	0.030	0.002
4.14	1.405	0.005	0.030	0.002
4.16	1.405	0.005	0.030	0.002
4.18	1.404	0.005	0.030	0.002
4.20	1.404	0.005	0.030	0.002
4.22	1.403	0.005	0.030	0.002
4.24	1.403	0.005	0.030	0.002
4.26	1.402	0.005	0.030	0.002
4.28	1.402	0.005	0.030	0.002
4.30	1.401	0.005	0.030	0.002
4.32	1.400	0.005	0.030	0.002
4.34	1.400	0.005	0.030	0.002
4.36	1.399	0.005	0.030	0.002
4.38	1.399	0.005	0.030	0.002
4.40	1.398	0.005	0.030	0.002
4.42	1.397	0.005	0.030	0.002
4.44	1.397	0.005	0.030	0.002
4.46	1.396	0.005	0.030	0.002
4.48	1.396	0.005	0.030	0.002
4.50	1.395	0.005	0.030	0.002
4.52	1.395	0.005	0.030	0.002
4.54	1.394	0.005	0.030	0.002
4.56	1.394	0.005	0.040	0.002
4.58	1.393	0.005	0.030	0.002
4.60	1.393	0.005	0.040	0.002
4.62	1.392	0.005	0.040	0.002
4.64	1.392	0.005	0.040	0.002
4.66	1.391	0.005	0.040	0.002
4.68	1.390	0.005	0.040	0.002
4.70	1.390	0.005	0.040	0.002
4.72	1.389	0.005	0.040	0.002
4.74	1.389	0.005	0.040	0.002
4.76	1.388	0.005	0.040	0.002
4.78	1.387	0.005	0.040	0.002
4.80	1.387	0.005	0.040	0.002
4.82	1.386	0.005	0.040	0.002
4.84	1.386	0.005	0.040	0.002
4.86	1.385	0.005	0.040	0.002
4.88	1.385	0.005	0.040	0.002
4.90	1.384	0.005	0.040	0.002
4.92	1.384	0.005	0.040	0.002
4.94	1.383	0.005	0.040	0.002
4.96	1.382	0.005	0.040	0.002
4.98	1.382	0.005	0.040	0.002
5.00	1.381	0.005	0.040	0.002
5.02	1.381	0.005	0.040	0.002
5.04	1.380	0.005	0.050	0.002
5.06	1.379	0.005	0.040	0.002
5.08	1.379	0.005	0.050	0.002
5.10	1.378	0.005	0.050	0.002
5.12	1.378	0.005	0.050	0.002
5.14	1.377	0.005	0.050	0.002
5.16	1.377	0.005	0.050	0.002
5.18	1.376	0.005	0.050	0.002
5.20	1.375	0.005	0.050	0.002
5.22	1.375	0.005	0.050	0.002
5.24	1.374	0.005	0.050	0.002
5.26	1.374	0.005	0.050	0.002
5.28	1.373	0.005	0.050	0.002
5.30	1.372	0.005	0.050	0.002
5.32	1.372	0.005	0.060	0.002
5.34	1.371	0.005	0.050	0.002
5.36	1.371	0.005	0.060	0.002
5.38	1.370	0.005	0.060	0.002
5.40	1.369	0.005	0.060	0.002
5.42	1.369	0.005	0.060	0.002
5.44	1.368	0.005	0.060	0.002
5.46	1.367	0.005	0.060	0.002
5.48	1.367	0.005	0.060	0.002
5.50	1.366	0.005	0.060	0.002
5.52	1.366	0.005	0.060	0.002
5.54	1.365	0.005	0.060	0.002
5.56	1.364	0.005	0.060	0.002
5.58	1.364	0.005	0.060	0.002
5.60	1.363	0.005	0.070	0.002
5.62	1.362	0.005	0.070	0.002
5.64	1.362	0.005	0.060	0.002
5.66	1.361	0.005	0.060	0.002
5.68	1.361	0.005	0.060	0.002
5.70	1.360	0.005	0.060	0.002
5.72	1.359	0.005	0.070	0.002
5.74	1.359	0.005	0.060	0.002
5.76	1.358	0.005	0.070	0.002
5.78	1.357	0.005	0.060	0.002
5.80	1.357	0.005	0.060	0.002
5.82	1.356	0.005	0.060	0.002
5.84	1.355	0.005	0.050	0.002
5.86	1.354	0.005	0.050	0.002
5.88	1.354	0.005	0.050	0.002
5.90	1.353	0.005	0.050	0.002
5.92	1.352	0.005	0.050	0.002
5.94	1.352	0.005	0.040	0.002
5.96	1.351	0.005	0.040	0.002
5.98	1.350	0.005	0.040	0.002
6.00	1.350	0.005	0.040	0.002
6.02	1.349	0.005	0.040	0.002
6.04	1.348	0.005	0.030	0.002
6.06	1.347	0.005	0.030	0.002
6.08	1.347	0.005	0.030	0.002
6.10	1.346	0.005	0.030	0.002
6.12	1.345	0.005	0.030	0.002
6.14	1.344	0.005	0.030	0.002
6.16	1.344	0.005	0.030	0.002
6.18	1.343	0.005	0.030	0.002
6.20	1.342	0.005	0.040	0.002
6.22	1.341	0.005	0.040	0.002
6.24	1.341	0.005	0.050	0.002
6.26	1.340	0.005	0.050	0.002
6.28	1.339	0.005	0.060	0.002
6.30	1.338	0.005	0.070	0.002
6.32	1.337	0.005	0.070	0.002
6.34	1.336	0.005	0.060	0.002
6.36	1.336	0.005	0.070	0.002
6.38	1.335	0.005	0.070	0.002
6.40	1.334	0.005	0.070	0.002
6.42	1.333	0.005	0.060	0.002
6.44	1.332	0.005	0.060	0.002
6.46	1.331	0.005	0.060	0.002
6.48	1.330	0.005	0.050	0.002
6.50	1.329	0.005	0.040	0.002
6.52	1.329	0.005	0.030	0.002
6.54	1.328	0.005	0.020	0.002
6.56	1.327	0.005	0.010	0.002
6.58	1.326	0.005	0.010	0.002
6.60	1.325	0.005	0.010	0.002
6.62	1.324	0.005	0.010	0.002
6.64	1.323	0.005	0.010	0.002
6.66	1.322	0.005	0.020	0.002
6.68	1.321	0.005	0.020	0.002
6.70	1.320	0.005	0.020	0.002
6.72	1.319	0.005	0.020	0.002
6.74	1.318	0.005	0.020	0.002
6.76	1.317	0.005	0.020	0.002
6.78	1.316	0.005	0.010	0.002
6.80	1.315	0.005	0.010	0.002
6.82	1.314	0.005	0.010	0.002
6.84	1.313	0.005	0.010	0.002
6.86	1.312	0.005	0.010	0.002
6.88	1.311	0.005	0.010	0.002
6.90	1.309	0.005	0.010	0.002
6.92	1.308	0.005	0.010	0.002
6.94	1.307	0.005	0.010	0.002
6.96	1.306	0.005	0.010	0.002
6.98	1.305	0.005	0.010	0.002
7.00	1.303	0.005	0.010	0.002
7.02	1.302	0.005	0.010	0.002
7.04	1.301	0.005	0.010	0.002
7.06	1.300	0.005	0.010	0.002
7.08	1.298	0.005	0.010	0.002
7.10	1.297	0.005	0.010	0.002
7.12	1.296	0.005	0.010	0.002
7.14	1.294	0.005	0.010	0.002
7.16	1.293	0.005	0.010	0.002
7.18	1.292	0.005	0.020	0.002
7.20	1.290	0.005	0.020	0.002
7.22	1.289	0.005	0.020	0.002
7.24	1.287	0.005	0.020	0.002
7.26	1.286	0.005	0.010	0.002
7.28	1.284	0.005	0.020	0.002
7.30	1.283	0.005	0.020	0.002
7.32	1.281	0.005	0.020	0.002
7.34	1.279	0.005	0.020	0.002
7.36	1.278	0.005	0.020	0.002
7.38	1.276	0.005	0.020	0.002
7.40	1.274	0.005	0.020	0.002
7.42	1.273	0.005	0.020	0.002
7.44	1.271	0.005	0.020	0.002
7.46	1.269	0.005	0.020	0.002
7.48	1.267	0.005	0.020	0.002
7.50	1.265	0.005	0.020	0.002
7.52	1.263	0.005	0.020	0.002
7.54	1.261	0.005	0.020	0.002
7.56	1.259	0.005	0.020	0.002
7.58	1.256	0.005	0.020	0.002
7.60	1.254	0.005	0.020	0.002
7.62	1.252	0.005	0.020	0.002
7.64	1.249	0.005	0.030	0.002
7.66	1.246	0.005	0.030	0.002
7.68	1.244	0.005	0.030	0.002
7.70	1.240	0.005	0.030	0.002
7.72	1.237	0.006	0.030	0.002
7.74	1.234	0.007	0.030	0.002
7.76	1.231	0.008	0.030	0.002
7.78	1.228	0.009	0.030	0.002
7.80	1.225	0.010	0.030	0.002
7.82	1.223	0.011	0.030	0.002
7.84	1.220	0.012	0.030	0.002
7.86	1.217	0.013	0.030	0.002
7.88	1.214	0.014	0.040	0.002
7.90	1.212	0.015	0.040	0.002
7.92	1.209	0.016	0.040	0.002
7.94	1.206	0.017	0.040	0.002
7.96	1.203	0.018	0.040	0.002
7.98	1.200	0.019	0.040	0.002
8.00	1.196	0.020	0.040	0.002
8.02	1.193	0.021	0.040	0.002
8.04	1.190	0.022	0.040	0.002
8.06	1.186	0.023	0.040	0.004
8.08	1.182	0.024	0.040	0.002
8.10	1.179	0.025	0.050	0.006
8.12	1.174	0.026	0.050	0.006
8.14	1.169	0.028	0.050	0.002
8.16	1.164	0.030	0.050	0.005
8.18	1.160	0.034	0.050	0.008
8.20	1.156	0.034	0.050	0.007
8.22	1.150	0.038	0.050	0.009
8.24	1.148	0.040	0.050	0.009
8.26	1.141	0.042	0.050	0.008
8.28	1.136	0.047	0.060	0.010
8.30	1.132	0.050	0.060	0.010
8.32	1.127	0.054	0.060	0.011
8.34	1.123	0.058	0.060	0.012
8.36	1.119	0.062	0.060	0.013
8.38	1.114	0.066	0.060	0.013
8.40	1.110	0.070	0.060	0.014
8.42	1.103	0.074	0.060	0.014
8.44	1.099	0.082	0.060	0.017
8.46	1.097	0.086	0.060	0.017
8.48	1.092	0.091	0.060	0.018
8.50	1.089	0.096	0.060	0.019
8.52	1.084	0.102	0.060	0.020
8.54	1.082	0.106	0.070	0.021
8.56	1.075	0.111	0.070	0.021
8.58	1.071	0.118	0.070	0.023
8.60	1.066	0.124	0.070	0.024
8.62	1.062	0.131	0.070	0.025
8.64	1.058	0.138	0.070	0.027
8.66	1.055	0.144	0.070	0.028
8.68	1.048	0.151	0.070	0.029
8.70	1.044	0.161	0.070	0.031
8.72	1.040	0.169	0.070	0.033
8.74	1.035	0.179	0.070	0.034
8.76	1.031	0.189	0.070	0.036
8.78	1.028	0.200	0.070	0.037
8.80	1.025	0.212	0.070	0.039
8.82	1.024	0.224	0.070	0.041
8.84	1.023	0.237	0.070	0.043
8.86	1.024	0.249	0.070	0.044
8.88	1.025	0.262	0.070	0.046
8.90	1.030	0.274	0.070	0.047
8.92	1.032	0.283	0.070	0.047
8.94	1.037	0.294	0.070	0.048
8.96	1.040	0.302	0.070	0.049
8.98	1.044	0.311	0.070	0.050
9.00	1.048	0.319	0.060	0.051
9.02	1.054	0.327	0.060	0.051
9.04	1.058	0.331	0.060	0.051
9.06	1.060	0.337	0.060	0.052
9.08	1.062	0.341	0.060	0.052
9.10	1.062	0.347	0.060	0.053
9.12	1.062	0.351	0.060	0.053
9.14	1.059	0.359	0.060	0.054
9.16	1.058	0.366	0.060	0.054
9.18	1.055	0.375	0.060	0.055
9.20	1.053	0.384	0.060	0.056
9.22	1.049	0.396	0.060	0.057
9.24	1.048	0.408	0.060	0.058
9.26	1.043	0.422	0.060	0.059
9.28	1.043	0.439	0.060	0.061
9.30	1.042	0.456	0.060	0.062
9.32	1.043	0.475	0.060	0.063
9.34	1.047	0.494	0.060	0.065
9.36	1.050	0.514	0.060	0.066
9.38	1.056	0.537	0.060	0.068
9.40	1.065	0.558	0.060	0.069
9.42	1.076	0.580	0.060	0.071
9.44	1.089	0.601	0.060	0.073
9.46	1.103	0.622	0.060	0.074
9.48	1.121	0.641	0.060	0.076
9.50	1.136	0.660	0.060	0.078
9.52	1.156	0.681	0.060	0.081
9.54	1.177	0.700	0.060	0.083
9.56	1.203	0.721	0.060	0.086
9.58	1.232	0.736	0.060	0.088
9.60	1.263	0.750	0.060	0.092
9.62	1.297	0.759	0.060	0.094
9.64	1.329	0.763	0.050	0.097
9.66	1.362	0.766	0.050	0.099
9.68	1.393	0.764	0.050	0.101
9.70	1.423	0.762	0.050	0.103
9.72	1.453	0.758	0.040	0.105
9.74	1.483	0.752	0.040	0.106
9.76	1.512	0.741	0.040	0.107
9.78	1.537	0.730	0.040	0.109
9.80	1.562	0.717	0.030	0.108
9.82	1.582	0.703	0.030	0.108
9.84	1.601	0.693	0.030	0.110
9.86	1.623	0.682	0.030	0.110
9.88	1.644	0.670	0.020	0.110
9.90	1.664	0.658	0.020	0.110
9.92	1.686	0.646	0.020	0.110
9.94	1.709	0.631	0.020	0.109
9.96	1.734	0.615	0.020	0.109
9.98	1.759	0.592	0.030	0.106
10.00	1.781	0.566	0.030	0.103
10.02	1.798	0.534	0.030	0.098
10.04	1.809	0.504	0.040	0.092
10.06	1.818	0.472	0.040	0.086
10.08	1.820	0.442	0.040	0.079
10.10	1.822	0.412	0.040	0.073
10.12	1.818	0.384	0.040	0.066
10.14	1.814	0.360	0.040	0.061
10.16	1.806	0.336	0.040	0.056
10.18	1.799	0.316	0.040	0.052
10.20	1.789	0.297	0.040	0.048
10.22	1.780	0.282	0.030	0.045
10.24	1.771	0.266	0.030	0.042
10.26	1.761	0.254	0.030	0.040
10.28	1.754	0.242	0.030	0.038
10.30	1.745	0.229	0.030	0.035
10.32	1.735	0.219	0.020	0.034
10.34	1.727	0.211	0.020	0.033
10.36	1.719	0.201	0.020	0.030
10.38	1.709	0.193	0.020	0.029
10.40	1.700	0.186	0.020	0.028
10.42	1.691	0.180	0.020	0.027
10.44	1.683	0.175	0.020	0.026
10.46	1.674	0.171	0.010	0.026
10.48	1.668	0.168	0.010	0.026
10.50	1.661	0.163	0.010	0.025
10.52	1.652	0.160	0.010	0.024
10.54	1.646	0.159	0.010	0.024
10.56	1.640	0.156	0.010	0.024
10.58	1.633	0.155	0.010	0.024
10.60	1.628	0.154	0.010	0.024
10.62	1.622	0.153	0.010	0.024
10.64	1.617	0.153	0.010	0.024
10.66	1.613	0.153	0.010	0.024
10.68	1.608	0.152	0.010	0.024
10.70	1.604	0.153	0.010	0.024
10.72	1.601	0.154	0.010	0.025
10.74	1.599	0.154	0.010	0.025
10.76	1.595	0.154	0.010	0.025
10.78	1.593	0.155	0.010	0.025
10.80	1.590	0.155	0.010	0.024
10.82	1.587	0.158	0.010	0.025
10.84	1.586	0.159	0.010	0.025
10.86	1.585	0.162	0.010	0.026
10.88	1.586	0.164	0.010	0.027
10.90	1.587	0.166	0.010	0.027
10.92	1.590	0.168	0.010	0.029
10.94	1.594	0.168	0.010	0.029
10.96	1.598	0.165	0.010	0.027
10.98	1.599	0.163	0.010	0.027
11.00	1.603	0.161	0.010	0.027
11.02	1.605	0.157	0.010	0.027
11.04	1.607	0.153	0.010	0.026
11.06	1.607	0.149	0.010	0.025
11.08	1.609	0.145	0.010	0.025
11.10	1.609	0.139	0.010	0.024
11.12	1.609	0.134	0.010	0.023
11.14	1.607	0.129	0.010	0.022
11.16	1.605	0.125	0.010	0.022
11.18	1.602	0.120	0.010	0.021
11.20	1.600	0.118	0.010	0.021
11.22	1.598	0.114	0.010	0.020
11.24	1.594	0.112	0.010	0.020
11.26	1.593	0.109	0.010	0.019
11.28	1.589	0.107	0.010	0.019
11.30	1.587	0.106	0.010	0.018
11.32	1.584	0.104	0.010	0.018
11.34	1.582	0.104	0.010	0.018
11.36	1.581	0.103	0.010	0.019
11.38	1.579	0.102	0.010	0.018
11.40	1.579	0.101	0.010	0.018
11.42	1.578	0.099	0.010	0.018
11.44	1.576	0.097	0.010	0.018
11.46	1.574	0.096	0.010	0.017
11.48	1.574	0.095	0.010	0.017
11.50	1.572	0.093	0.010	0.017
11.52	1.571	0.093	0.010	0.018
11.54	1.571	0.090	0.010	0.016
11.56	1.569	0.089	0.010	0.017
11.58	1.568	0.086	0.010	0.016
11.60	1.564	0.085	0.010	0.016
11.62	1.564	0.085	0.010	0.016
11.64	1.561	0.084	0.010	0.016
11.66	1.562	0.084	0.010	0.016
11.68	1.560	0.082	0.010	0.016
11.70	1.559	0.082	0.010	0.016
11.72	1.558	0.081	0.010	0.016
11.74	1.558	0.080	0.010	0.016
11.76	1.557	0.079	0.010	0.016
11.78	1.558	0.077	0.010	0.016
11.80	1.555	0.075	0.010	0.015
11.82	1.555	0.075	0.020	0.015
11.84	1.553	0.073	0.020	0.015
11.86	1.553	0.073	0.020	0.015
11.88	1.552	0.070	0.020	0.014
11.90	1.551	0.070	0.020	0.014
11.92	1.549	0.070	0.020	0.014
11.94	1.551	0.070	0.020	0.014
11.96	1.551	0.070	0.020	0.014
11.98	1.563	0.069	0.020	0.014
12.00	1.561	0.047	0.020	0.014
12.02	1.546	0.046	0.020	0.014
12.04	1.543	0.046	0.020	0.014
12.06	1.537	0.047	0.020	0.014
12.08	1.537	0.046	0.020	0.014
12.10	1.531	0.045	0.020	0.014
12.12	1.529	0.046	0.020	0.014
12.14	1.526	0.046	0.020	0.014
12.16	1.525	0.046	0.020	0.014
12.18	1.522	0.045	0.020	0.014
12.20	1.520	0.045	0.020	0.014
12.22	1.516	0.045	0.020	0.014
12.24	1.515	0.046	0.020	0.014
12.26	1.512	0.046	0.020	0.014
12.28	1.510	0.047	0.020	0.014
12.30	1.507	0.048	0.020	0.015
12.32	1.506	0.049	0.020	0.015
12.34	1.504	0.050	0.020	0.016
12.36	1.502	0.052	0.020	0.016
12.38	1.501	0.054	0.030	0.016
12.40	1.500	0.055	0.020	0.016
12.42	1.499	0.058	0.030	0.017
12.44	1.501	0.059	0.030	0.019
12.46	1.500	0.060	0.020	0.019
12.48	1.501	0.061	0.020	0.018
12.50	1.501	0.062	0.020	0.018
12.52	1.502	0.062	0.020	0.018
12.54	1.502	0.063	0.020	0.018
12.56	1.503	0.063	0.020	0.018
12.58	1.503	0.063	0.020	0.018
12.60	1.505	0.063	0.020	0.018
12.62	1.505	0.062	0.020	0.018
12.64	1.506	0.061	0.020	0.018
12.66	1.505	0.060	0.020	0.018
12.68	1.505	0.060	0.020	0.018
12.70	1.505	0.060	0.030	0.018
12.72	1.506	0.059	0.030	0.018
12.74	1.505	0.058	0.030	0.018
12.76	1.505	0.058	0.030	0.018
12.78	1.504	0.058	0.030	0.018
12.80	1.505	0.057	0.030	0.020
12.82	1.503	0.057	0.030	0.020
12.84	1.505	0.058	0.020	0.020
12.86	1.505	0.057	0.020	0.018
12.88	1.506	0.057	0.020	0.018
12.90	1.505	0.057	0.020	0.018
12.92	1.508	0.057	0.020	0.018
12.94	1.508	0.056	0.030	0.018
12.96	1.511	0.055	0.020	0.018
12.98	1.510	0.054	0.030	0.018
13.00	1.514	0.053	0.030	0.017
13.02	1.513	0.052	0.030	0.018
13.04	1.526	0.051	0.030	0.017
13.06	1.524	0.029	0.030	0.017
13.08	1.510	0.029	0.030	0.017
13.10	1.508	0.028	0.030	0.018
13.12	1.502	0.029	0.030	0.018
13.14	1.502	0.029	0.030	0.018
13.16	1.499	0.029	0.030	0.018
13.18	1.499	0.029	0.030	0.018
13.20	1.496	0.028	0.030	0.018
13.22	1.495	0.028	0.030	0.018
13.24	1.493	0.028	0.030	0.018
13.26	1.492	0.028	0.030	0.018
13.28	1.491	0.028	0.030	0.018
13.30	1.490	0.028	0.030	0.018
13.32	1.489	0.028	0.030	0.018
13.34	1.489	0.026	0.030	0.018
13.36	1.486	0.026	0.030	0.018
13.38	1.485	0.026	0.030	0.018
13.40	1.484	0.026	0.030	0.018
13.42	1.483	0.026	0.030	0.018
13.44	1.482	0.026	0.030	0.017
13.46	1.481	0.026	0.030	0.017
13.48	1.480	0.026	0.030	0.017
13.50	1.481	0.026	0.030	0.016
13.52	1.480	0.024	0.030	0.016
13.54	1.478	0.024	0.030	0.016
13.56	1.477	0.024	0.030	0.016
13.58	1.476	0.024	0.030	0.015
13.60	1.475	0.024	0.030	0.015
13.62	1.474	0.023	0.030	0.015
13.64	1.473	0.023	0.030	0.015
13.66	1.472	0.023	0.030	0.017
13.68	1.471	0.023	0.030	0.017
13.70	1.470	0.023	0.030	0.016
13.72	1.469	0.023	0.030	0.016
13.74	1.468	0.023	0.030	0.016
13.76	1.467	0.023	0.030	0.016
13.78	1.466	0.023	0.030	0.016
13.80	1.465	0.023	0.030	0.016
13.82	1.464	0.023	0.030	0.017
13.84	1.463	0.023	0.030	0.017
13.86	1.463	0.024	0.030	0.017
13.88	1.463	0.023	0.030	0.017
13.90	1.461	0.023	0.030	0.017
13.92	1.460	0.023	0.030	0.017
13.94	1.459	0.023	0.030	0.017
13.96	1.458	0.023	0.030	0.017
13.98	1.457	0.023	0.030	0.017
14.00	1.456	0.024	0.030	0.017
14.02	1.455	0.024	0.030	0.017
14.04	1.455	0.025	0.040	0.018
14.06	1.453	0.024	0.040	0.018
14.08	1.452	0.026	0.040	0.019
14.10	1.452	0.026	0.040	0.019
14.12	1.451	0.027	0.040	0.019
14.14	1.451	0.027	0.040	0.020
14.16	1.450	0.028	0.040	0.020
14.18	1.450	0.029	0.040	0.020
14.20	1.450	0.029	0.040	0.021
14.22	1.449	0.030	0.040	0.022
14.24	1.449	0.031	0.040	0.022
14.26	1.449	0.031	0.040	0.024
14.28	1.449	0.032	0.040	0.024
14.30	1.449	0.033	0.040	0.024
14.32	1.450	0.033	0.040	0.024
14.34	1.450	0.033	0.030	0.024
14.36	1.450	0.033	0.040	0.024
14.38	1.449	0.035	0.030	0.024
14.40	1.452	0.036	0.030	0.024
14.42	1.453	0.034	0.030	0.024
14.44	1.452	0.034	0.030	0.024
14.46	1.453	0.034	0.030	0.024
14.48	1.454	0.033	0.030	0.024
14.50	1.454	0.032	0.030	0.023
14.52	1.453	0.032	0.030	0.023
14.54	1.453	0.032	0.030	0.022
14.56	1.454	0.032	0.030	0.021
14.58	1.454	0.031	0.030	0.020
14.60	1.454	0.031	0.030	0.019
14.62	1.454	0.030	0.030	0.019
14.64	1.453	0.030	0.040	0.019
14.66	1.453	0.030	0.040	0.020
14.68	1.454	0.030	0.040	0.020
14.70	1.453	0.030	0.040	0.019
14.72	1.455	0.031	0.040	0.019
14.74	1.456	0.029	0.040	0.019
14.76	1.456	0.029	0.040	0.020
14.78	1.457	0.029	0.040	0.020
14.80	1.459	0.028	0.040	0.021
14.82	1.460	0.025	0.040	0.020
14.84	1.460	0.024	0.050	0.019
14.86	1.460	0.021	0.040	0.019
14.88	1.460	0.019	0.050	0.019
14.90	1.459	0.016	0.050	0.018
14.92	1.456	0.015	0.060	0.018
14.94	1.455	0.015	0.060	0.017
14.96	1.455	0.015	0.080	0.017
14.98	1.454	0.014	0.070	0.016
15.00	1.458	0.015	0.070	0.019
