# Supplementary material for: Global scale variability of the mineral dust longwave refractive index: a new dataset of in situ measurements for climate modelling and remote sensing
Source: Copernicus journal article supplement (doi:10.5194/acp-2016-616), 2016-10-19
Supplement: Supplementary file 1 [file acp-2016-616-supplement.zip › Supplementary_DiBiagio_ACPD/CRI_results_Australia.txt]

wavelength(microns)	real_part(n)	imaginary_part(k)	standard_deviation(n)	standard_deviation(k)
3.00	1.490	0.004	0.042	0.002
3.02	1.486	0.004	0.025	0.002
3.04	1.485	0.004	0.032	0.002
3.06	1.472	0.004	0.024	0.002
3.08	1.472	0.004	0.033	0.002
3.10	1.464	0.004	0.029	0.002
3.12	1.463	0.004	0.031	0.002
3.14	1.458	0.004	0.030	0.002
3.16	1.457	0.004	0.034	0.002
3.18	1.452	0.004	0.033	0.002
3.20	1.452	0.004	0.036	0.002
3.22	1.448	0.004	0.035	0.002
3.24	1.448	0.004	0.037	0.002
3.26	1.444	0.004	0.036	0.002
3.28	1.444	0.004	0.039	0.002
3.30	1.441	0.004	0.038	0.002
3.32	1.440	0.004	0.041	0.002
3.34	1.437	0.004	0.040	0.002
3.36	1.437	0.004	0.043	0.002
3.38	1.434	0.004	0.043	0.002
3.40	1.434	0.004	0.046	0.002
3.42	1.432	0.004	0.046	0.002
3.44	1.431	0.004	0.050	0.002
3.46	1.429	0.004	0.051	0.002
3.48	1.429	0.004	0.053	0.002
3.50	1.426	0.004	0.055	0.002
3.52	1.426	0.004	0.057	0.002
3.54	1.424	0.004	0.057	0.002
3.56	1.424	0.004	0.060	0.002
3.58	1.422	0.004	0.061	0.002
3.60	1.421	0.004	0.062	0.002
3.62	1.420	0.004	0.063	0.002
3.64	1.419	0.004	0.066	0.002
3.66	1.417	0.004	0.066	0.002
3.68	1.417	0.004	0.068	0.002
3.70	1.415	0.004	0.068	0.002
3.72	1.415	0.004	0.070	0.002
3.74	1.413	0.004	0.071	0.002
3.76	1.413	0.004	0.073	0.002
3.78	1.411	0.004	0.074	0.002
3.80	1.411	0.004	0.076	0.002
3.82	1.409	0.004	0.076	0.002
3.84	1.409	0.004	0.079	0.002
3.86	1.407	0.004	0.080	0.002
3.88	1.407	0.004	0.082	0.002
3.90	1.406	0.004	0.083	0.002
3.92	1.405	0.004	0.086	0.002
3.94	1.404	0.004	0.087	0.002
3.96	1.403	0.004	0.090	0.002
3.98	1.402	0.004	0.092	0.002
4.00	1.402	0.004	0.095	0.002
4.02	1.400	0.004	0.097	0.002
4.04	1.400	0.004	0.101	0.002
4.06	1.398	0.004	0.105	0.002
4.08	1.398	0.004	0.111	0.002
4.10	1.397	0.004	0.113	0.002
4.12	1.396	0.004	0.111	0.002
4.14	1.395	0.004	0.112	0.002
4.16	1.395	0.004	0.101	0.002
4.18	1.393	0.004	0.097	0.002
4.20	1.393	0.004	0.098	0.002
4.22	1.392	0.004	0.086	0.002
4.24	1.391	0.004	0.080	0.002
4.26	1.390	0.004	0.060	0.002
4.28	1.390	0.004	0.052	0.002
4.30	1.388	0.004	0.030	0.002
4.32	1.388	0.004	0.020	0.002
4.34	1.387	0.004	0.021	0.002
4.36	1.386	0.004	0.023	0.002
4.38	1.385	0.004	0.016	0.002
4.40	1.385	0.004	0.021	0.002
4.42	1.384	0.004	0.018	0.002
4.44	1.383	0.004	0.028	0.002
4.46	1.382	0.004	0.032	0.002
4.48	1.381	0.004	0.043	0.002
4.50	1.380	0.004	0.046	0.002
4.52	1.380	0.004	0.052	0.002
4.54	1.379	0.004	0.054	0.002
4.56	1.378	0.004	0.060	0.002
4.58	1.377	0.004	0.061	0.002
4.60	1.377	0.004	0.065	0.002
4.62	1.376	0.004	0.067	0.002
4.64	1.375	0.004	0.070	0.002
4.66	1.374	0.004	0.072	0.002
4.68	1.374	0.004	0.075	0.002
4.70	1.372	0.004	0.076	0.002
4.72	1.372	0.004	0.079	0.002
4.74	1.371	0.004	0.080	0.002
4.76	1.370	0.004	0.082	0.002
4.78	1.369	0.004	0.083	0.002
4.80	1.369	0.004	0.086	0.002
4.82	1.368	0.004	0.086	0.002
4.84	1.367	0.004	0.090	0.002
4.86	1.366	0.004	0.090	0.002
4.88	1.366	0.004	0.093	0.002
4.90	1.365	0.004	0.094	0.002
4.92	1.364	0.004	0.096	0.002
4.94	1.363	0.004	0.095	0.002
4.96	1.362	0.004	0.099	0.002
4.98	1.361	0.004	0.099	0.002
5.00	1.361	0.004	0.100	0.002
5.02	1.360	0.004	0.102	0.002
5.04	1.359	0.004	0.104	0.002
5.06	1.358	0.004	0.102	0.002
5.08	1.358	0.004	0.107	0.002
5.10	1.357	0.004	0.107	0.002
5.12	1.356	0.004	0.108	0.002
5.14	1.355	0.004	0.107	0.002
5.16	1.354	0.004	0.110	0.002
5.18	1.353	0.004	0.110	0.002
5.20	1.353	0.004	0.112	0.002
5.22	1.352	0.004	0.113	0.002
5.24	1.351	0.004	0.115	0.002
5.26	1.350	0.004	0.114	0.002
5.28	1.350	0.004	0.115	0.002
5.30	1.348	0.004	0.115	0.002
5.32	1.348	0.004	0.118	0.002
5.34	1.347	0.004	0.118	0.002
5.36	1.346	0.004	0.120	0.002
5.38	1.345	0.004	0.116	0.002
5.40	1.345	0.004	0.119	0.002
5.42	1.344	0.004	0.120	0.002
5.44	1.343	0.004	0.121	0.002
5.46	1.342	0.004	0.119	0.002
5.48	1.341	0.004	0.119	0.002
5.50	1.340	0.004	0.119	0.002
5.52	1.340	0.004	0.121	0.002
5.54	1.338	0.004	0.117	0.002
5.56	1.338	0.004	0.119	0.002
5.58	1.337	0.004	0.120	0.002
5.60	1.336	0.004	0.127	0.002
5.62	1.335	0.004	0.121	0.002
5.64	1.334	0.004	0.119	0.002
5.66	1.333	0.004	0.115	0.002
5.68	1.333	0.004	0.113	0.002
5.70	1.331	0.004	0.116	0.002
5.72	1.331	0.004	0.119	0.002
5.74	1.330	0.004	0.111	0.002
5.76	1.329	0.004	0.122	0.002
5.78	1.328	0.004	0.110	0.002
5.80	1.327	0.004	0.109	0.002
5.82	1.326	0.004	0.106	0.002
5.84	1.325	0.004	0.104	0.002
5.86	1.324	0.004	0.094	0.002
5.88	1.324	0.004	0.097	0.002
5.90	1.322	0.004	0.090	0.002
5.92	1.322	0.004	0.100	0.002
5.94	1.320	0.004	0.094	0.002
5.96	1.320	0.004	0.085	0.002
5.98	1.319	0.004	0.061	0.002
6.00	1.318	0.004	0.060	0.002
6.02	1.317	0.004	0.039	0.002
6.04	1.316	0.004	0.040	0.002
6.06	1.315	0.004	0.014	0.002
6.08	1.314	0.004	0.020	0.002
6.10	1.313	0.004	0.016	0.002
6.12	1.312	0.004	0.015	0.002
6.14	1.311	0.004	0.035	0.002
6.16	1.310	0.004	0.076	0.002
6.18	1.309	0.004	0.029	0.002
6.20	1.308	0.004	0.025	0.002
6.22	1.306	0.004	0.028	0.002
6.24	1.306	0.004	0.043	0.002
6.26	1.304	0.004	0.065	0.002
6.28	1.304	0.004	0.076	0.002
6.30	1.302	0.004	0.098	0.002
6.32	1.301	0.004	0.093	0.002
6.34	1.300	0.004	0.095	0.002
6.36	1.299	0.004	0.101	0.002
6.38	1.298	0.004	0.107	0.002
6.40	1.297	0.004	0.103	0.002
6.42	1.296	0.004	0.088	0.002
6.44	1.295	0.004	0.063	0.002
6.46	1.293	0.004	0.054	0.002
6.48	1.292	0.004	0.041	0.002
6.50	1.291	0.004	0.035	0.002
6.52	1.290	0.004	0.025	0.002
6.54	1.288	0.004	0.020	0.002
6.56	1.287	0.004	0.013	0.002
6.58	1.286	0.004	0.010	0.002
6.60	1.285	0.004	0.014	0.002
6.62	1.283	0.004	0.017	0.002
6.64	1.282	0.004	0.028	0.002
6.66	1.281	0.004	0.033	0.002
6.68	1.280	0.004	0.048	0.002
6.70	1.278	0.004	0.060	0.002
6.72	1.277	0.004	0.083	0.002
6.74	1.275	0.004	0.094	0.002
6.76	1.274	0.004	0.112	0.002
6.78	1.273	0.004	0.091	0.002
6.80	1.272	0.004	0.125	0.002
6.82	1.270	0.004	0.146	0.002
6.84	1.269	0.004	0.104	0.002
6.86	1.266	0.004	0.091	0.002
6.88	1.266	0.005	0.083	0.002
6.90	1.264	0.004	0.081	0.002
6.92	1.263	0.005	0.069	0.002
6.94	1.262	0.004	0.067	0.002
6.96	1.260	0.004	0.069	0.002
6.98	1.258	0.004	0.069	0.002
7.00	1.256	0.004	0.056	0.002
7.02	1.255	0.004	0.048	0.002
7.04	1.253	0.004	0.039	0.002
7.06	1.251	0.004	0.039	0.002
7.08	1.249	0.004	0.042	0.002
7.10	1.248	0.005	0.043	0.002
7.12	1.246	0.004	0.042	0.002
7.14	1.244	0.005	0.041	0.002
7.16	1.243	0.004	0.037	0.002
7.18	1.240	0.005	0.035	0.002
7.20	1.240	0.004	0.033	0.002
7.22	1.236	0.004	0.032	0.002
7.24	1.236	0.004	0.034	0.002
7.26	1.232	0.004	0.038	0.002
7.28	1.232	0.005	0.035	0.002
7.30	1.228	0.004	0.032	0.002
7.32	1.227	0.006	0.029	0.002
7.34	1.225	0.004	0.025	0.002
7.36	1.223	0.006	0.023	0.002
7.38	1.221	0.004	0.026	0.002
7.40	1.218	0.006	0.026	0.002
7.42	1.218	0.006	0.025	0.002
7.44	1.215	0.004	0.024	0.002
7.46	1.211	0.004	0.021	0.002
7.48	1.210	0.005	0.019	0.002
7.50	1.206	0.004	0.019	0.002
7.52	1.204	0.006	0.019	0.002
7.54	1.201	0.004	0.019	0.002
7.56	1.199	0.006	0.020	0.002
7.58	1.197	0.004	0.020	0.002
7.60	1.193	0.005	0.018	0.002
7.62	1.190	0.004	0.018	0.002
7.64	1.186	0.006	0.018	0.002
7.66	1.185	0.005	0.018	0.002
7.68	1.181	0.006	0.018	0.002
7.70	1.179	0.005	0.019	0.002
7.72	1.174	0.004	0.019	0.002
7.74	1.170	0.005	0.020	0.002
7.76	1.167	0.006	0.022	0.002
7.78	1.164	0.004	0.023	0.002
7.80	1.158	0.005	0.024	0.002
7.82	1.154	0.006	0.025	0.002
7.84	1.150	0.007	0.026	0.002
7.86	1.146	0.008	0.028	0.002
7.88	1.141	0.009	0.029	0.002
7.90	1.138	0.010	0.030	0.002
7.92	1.134	0.010	0.031	0.002
7.94	1.129	0.011	0.033	0.002
7.96	1.125	0.012	0.034	0.003
7.98	1.120	0.012	0.035	0.002
8.00	1.114	0.013	0.037	0.002
8.02	1.110	0.015	0.039	0.002
8.04	1.105	0.015	0.040	0.002
8.06	1.099	0.015	0.041	0.002
8.08	1.093	0.015	0.043	0.002
8.10	1.085	0.017	0.045	0.002
8.12	1.079	0.019	0.046	0.003
8.14	1.071	0.020	0.048	0.003
8.16	1.063	0.023	0.049	0.003
8.18	1.054	0.025	0.052	0.004
8.20	1.047	0.031	0.053	0.005
8.22	1.039	0.033	0.055	0.005
8.24	1.031	0.039	0.057	0.005
8.26	1.024	0.041	0.059	0.006
8.28	1.012	0.048	0.061	0.007
8.30	1.006	0.055	0.062	0.009
8.32	0.997	0.061	0.064	0.009
8.34	0.990	0.068	0.066	0.010
8.36	0.982	0.075	0.067	0.012
8.38	0.973	0.082	0.069	0.013
8.40	0.963	0.093	0.071	0.016
8.42	0.957	0.104	0.072	0.017
8.44	0.951	0.114	0.073	0.019
8.46	0.945	0.125	0.074	0.022
8.48	0.941	0.136	0.075	0.023
8.50	0.935	0.145	0.076	0.025
8.52	0.930	0.159	0.076	0.027
8.54	0.928	0.168	0.077	0.029
8.56	0.921	0.180	0.077	0.031
8.58	0.919	0.192	0.077	0.033
8.60	0.915	0.205	0.077	0.034
8.62	0.914	0.216	0.077	0.036
8.64	0.908	0.229	0.077	0.038
8.66	0.909	0.243	0.076	0.039
8.68	0.907	0.254	0.076	0.041
8.70	0.906	0.266	0.075	0.043
8.72	0.902	0.280	0.075	0.043
8.74	0.903	0.296	0.075	0.045
8.76	0.903	0.309	0.074	0.046
8.78	0.905	0.325	0.073	0.047
8.80	0.907	0.338	0.073	0.048
8.82	0.910	0.354	0.072	0.049
8.84	0.915	0.368	0.071	0.050
8.86	0.921	0.381	0.071	0.051
8.88	0.927	0.392	0.070	0.051
8.90	0.932	0.402	0.070	0.051
8.92	0.935	0.415	0.070	0.053
8.94	0.943	0.427	0.069	0.054
8.96	0.949	0.438	0.068	0.054
8.98	0.958	0.448	0.068	0.055
9.00	0.964	0.456	0.067	0.055
9.02	0.973	0.464	0.067	0.056
9.04	0.978	0.469	0.066	0.056
9.06	0.984	0.476	0.066	0.056
9.08	0.988	0.481	0.066	0.056
9.10	0.991	0.487	0.066	0.057
9.12	0.992	0.492	0.065	0.057
9.14	0.992	0.501	0.066	0.057
9.16	0.993	0.509	0.065	0.058
9.18	0.994	0.518	0.066	0.058
9.20	0.992	0.527	0.066	0.059
9.22	0.990	0.538	0.066	0.059
9.24	0.986	0.552	0.066	0.060
9.26	0.986	0.570	0.067	0.061
9.28	0.985	0.587	0.066	0.062
9.30	0.987	0.609	0.067	0.063
9.32	0.990	0.631	0.067	0.064
9.34	0.998	0.656	0.067	0.066
9.36	1.007	0.676	0.066	0.067
9.38	1.017	0.702	0.067	0.068
9.40	1.031	0.723	0.066	0.069
9.42	1.044	0.748	0.067	0.071
9.44	1.063	0.772	0.067	0.073
9.46	1.082	0.797	0.068	0.074
9.48	1.108	0.819	0.067	0.076
9.50	1.134	0.840	0.068	0.078
9.52	1.163	0.858	0.068	0.080
9.54	1.193	0.876	0.068	0.082
9.56	1.228	0.890	0.068	0.083
9.58	1.260	0.903	0.069	0.086
9.60	1.301	0.915	0.068	0.089
9.62	1.340	0.919	0.067	0.091
9.64	1.383	0.921	0.065	0.094
9.66	1.423	0.914	0.064	0.095
9.68	1.464	0.907	0.062	0.097
9.70	1.504	0.890	0.061	0.096
9.72	1.538	0.871	0.059	0.096
9.74	1.568	0.847	0.057	0.095
9.76	1.594	0.823	0.056	0.094
9.78	1.614	0.796	0.055	0.092
9.80	1.630	0.773	0.054	0.090
9.82	1.642	0.746	0.053	0.087
9.84	1.648	0.726	0.053	0.085
9.86	1.654	0.706	0.055	0.083
9.88	1.654	0.692	0.057	0.082
9.90	1.657	0.682	0.059	0.083
9.92	1.661	0.678	0.061	0.084
9.94	1.671	0.672	0.063	0.087
9.96	1.677	0.670	0.064	0.090
9.98	1.695	0.669	0.065	0.094
10.00	1.711	0.662	0.063	0.098
10.02	1.729	0.656	0.063	0.102
10.04	1.748	0.648	0.060	0.107
10.06	1.771	0.639	0.059	0.111
10.08	1.794	0.624	0.054	0.117
10.10	1.819	0.607	0.048	0.120
10.12	1.842	0.585	0.042	0.121
10.14	1.867	0.558	0.039	0.119
10.16	1.886	0.523	0.038	0.114
10.18	1.900	0.486	0.038	0.107
10.20	1.905	0.445	0.039	0.097
10.22	1.904	0.407	0.039	0.088
10.24	1.896	0.371	0.039	0.079
10.26	1.885	0.340	0.036	0.071
10.28	1.871	0.312	0.035	0.064
10.30	1.856	0.288	0.032	0.056
10.32	1.837	0.267	0.029	0.050
10.34	1.821	0.251	0.026	0.045
10.36	1.802	0.237	0.023	0.042
10.38	1.788	0.227	0.021	0.039
10.40	1.771	0.216	0.019	0.037
10.42	1.758	0.212	0.017	0.035
10.44	1.746	0.202	0.018	0.034
10.46	1.730	0.198	0.016	0.034
10.48	1.720	0.196	0.017	0.033
10.50	1.710	0.191	0.017	0.032
10.52	1.698	0.189	0.018	0.032
10.54	1.690	0.189	0.019	0.032
10.56	1.683	0.185	0.019	0.032
10.58	1.673	0.184	0.019	0.031
10.60	1.665	0.184	0.021	0.032
10.62	1.659	0.184	0.021	0.031
10.64	1.652	0.183	0.022	0.031
10.66	1.647	0.185	0.023	0.031
10.68	1.643	0.185	0.024	0.032
10.70	1.639	0.185	0.024	0.032
10.72	1.635	0.185	0.025	0.032
10.74	1.631	0.185	0.025	0.032
10.76	1.626	0.186	0.025	0.033
10.78	1.624	0.188	0.025	0.033
10.80	1.622	0.189	0.025	0.033
10.82	1.621	0.190	0.025	0.033
10.84	1.619	0.191	0.026	0.033
10.86	1.619	0.193	0.026	0.033
10.88	1.620	0.193	0.026	0.033
10.90	1.621	0.193	0.027	0.033
10.92	1.622	0.193	0.027	0.033
10.94	1.624	0.192	0.026	0.033
10.96	1.626	0.191	0.026	0.033
10.98	1.629	0.188	0.026	0.033
11.00	1.629	0.184	0.026	0.033
11.02	1.632	0.182	0.026	0.032
11.04	1.633	0.176	0.026	0.032
11.06	1.634	0.173	0.025	0.031
11.08	1.636	0.166	0.025	0.031
11.10	1.634	0.160	0.026	0.030
11.12	1.632	0.153	0.025	0.030
11.14	1.628	0.150	0.025	0.029
11.16	1.626	0.146	0.025	0.027
11.18	1.622	0.143	0.026	0.027
11.20	1.620	0.141	0.026	0.026
11.22	1.619	0.138	0.027	0.026
11.24	1.616	0.134	0.026	0.025
11.26	1.613	0.131	0.027	0.025
11.28	1.610	0.129	0.027	0.024
11.30	1.609	0.128	0.028	0.024
11.32	1.606	0.124	0.029	0.024
11.34	1.603	0.124	0.029	0.023
11.36	1.601	0.122	0.029	0.023
11.38	1.599	0.122	0.030	0.022
11.40	1.600	0.120	0.030	0.022
11.42	1.599	0.118	0.031	0.021
11.44	1.598	0.115	0.031	0.022
11.46	1.597	0.112	0.032	0.021
11.48	1.594	0.110	0.032	0.021
11.50	1.594	0.110	0.033	0.020
11.52	1.595	0.105	0.033	0.020
11.54	1.592	0.103	0.034	0.020
11.56	1.593	0.100	0.033	0.020
11.58	1.591	0.095	0.034	0.020
11.60	1.589	0.090	0.034	0.020
11.62	1.585	0.085	0.035	0.020
11.64	1.579	0.080	0.034	0.020
11.66	1.570	0.080	0.035	0.019
11.68	1.567	0.085	0.036	0.019
11.70	1.570	0.085	0.035	0.018
11.72	1.568	0.080	0.036	0.018
11.74	1.564	0.080	0.037	0.017
11.76	1.564	0.078	0.037	0.017
11.78	1.560	0.076	0.037	0.017
11.80	1.558	0.075	0.038	0.016
11.82	1.555	0.074	0.038	0.016
11.84	1.554	0.073	0.039	0.015
11.86	1.551	0.072	0.040	0.015
11.88	1.550	0.070	0.041	0.015
11.90	1.547	0.068	0.042	0.015
11.92	1.545	0.067	0.042	0.015
11.94	1.542	0.066	0.043	0.015
11.96	1.543	0.065	0.043	0.015
11.98	1.539	0.059	0.044	0.015
12.00	1.533	0.059	0.045	0.014
12.02	1.530	0.059	0.046	0.015
12.04	1.527	0.059	0.046	0.015
12.06	1.524	0.058	0.046	0.015
12.08	1.521	0.058	0.047	0.015
12.10	1.518	0.058	0.048	0.015
12.12	1.516	0.058	0.048	0.015
12.14	1.514	0.057	0.049	0.015
12.16	1.509	0.056	0.049	0.015
12.18	1.507	0.057	0.050	0.015
12.20	1.504	0.056	0.050	0.015
12.22	1.501	0.057	0.051	0.015
12.24	1.497	0.056	0.051	0.015
12.26	1.494	0.058	0.052	0.014
12.28	1.490	0.056	0.053	0.015
12.30	1.484	0.061	0.054	0.014
12.32	1.484	0.062	0.056	0.015
12.34	1.478	0.063	0.057	0.017
12.36	1.475	0.067	0.057	0.018
12.38	1.471	0.072	0.058	0.018
12.40	1.472	0.077	0.058	0.019
12.42	1.471	0.081	0.058	0.020
12.44	1.472	0.085	0.058	0.021
12.46	1.472	0.090	0.058	0.021
12.48	1.477	0.093	0.058	0.022
12.50	1.478	0.093	0.057	0.023
12.52	1.480	0.096	0.057	0.023
12.54	1.484	0.097	0.057	0.024
12.56	1.488	0.095	0.056	0.023
12.58	1.487	0.093	0.056	0.023
12.60	1.490	0.094	0.056	0.023
12.62	1.491	0.091	0.057	0.023
12.64	1.491	0.090	0.056	0.023
12.66	1.490	0.088	0.057	0.023
12.68	1.489	0.088	0.056	0.023
12.70	1.489	0.088	0.057	0.023
12.72	1.489	0.088	0.057	0.023
12.74	1.488	0.088	0.057	0.023
12.76	1.488	0.088	0.057	0.023
12.78	1.488	0.089	0.057	0.024
12.80	1.490	0.090	0.056	0.023
12.82	1.491	0.089	0.057	0.023
12.84	1.492	0.089	0.056	0.023
12.86	1.493	0.088	0.057	0.023
12.88	1.494	0.088	0.056	0.023
12.90	1.496	0.086	0.056	0.023
12.92	1.497	0.083	0.056	0.022
12.94	1.497	0.080	0.057	0.021
12.96	1.495	0.078	0.056	0.021
12.98	1.494	0.078	0.057	0.020
13.00	1.496	0.076	0.057	0.020
13.02	1.495	0.072	0.057	0.020
13.04	1.491	0.071	0.058	0.019
13.06	1.491	0.071	0.059	0.019
13.08	1.489	0.069	0.059	0.018
13.10	1.487	0.069	0.060	0.018
13.12	1.486	0.069	0.061	0.018
13.14	1.485	0.069	0.062	0.018
13.16	1.485	0.069	0.063	0.019
13.18	1.484	0.067	0.063	0.019
13.20	1.482	0.067	0.063	0.019
13.22	1.482	0.067	0.064	0.019
13.24	1.481	0.067	0.064	0.019
13.26	1.480	0.067	0.066	0.019
13.28	1.480	0.067	0.066	0.020
13.30	1.479	0.066	0.066	0.020
13.32	1.479	0.066	0.065	0.020
13.34	1.478	0.066	0.066	0.020
13.36	1.479	0.065	0.066	0.020
13.38	1.478	0.063	0.066	0.019
13.40	1.476	0.063	0.067	0.019
13.42	1.475	0.063	0.068	0.019
13.44	1.475	0.063	0.068	0.019
13.46	1.475	0.061	0.069	0.019
13.48	1.472	0.061	0.069	0.019
13.50	1.472	0.061	0.070	0.019
13.52	1.471	0.061	0.070	0.019
13.54	1.470	0.061	0.071	0.019
13.56	1.469	0.061	0.072	0.019
13.58	1.469	0.061	0.072	0.019
13.60	1.468	0.061	0.073	0.019
13.62	1.468	0.061	0.074	0.019
13.64	1.467	0.061	0.075	0.019
13.66	1.468	0.061	0.075	0.019
13.68	1.468	0.058	0.077	0.019
13.70	1.465	0.057	0.078	0.020
13.72	1.463	0.057	0.078	0.020
13.74	1.462	0.058	0.079	0.020
13.76	1.462	0.058	0.080	0.021
13.78	1.459	0.058	0.081	0.022
13.80	1.459	0.059	0.081	0.022
13.82	1.458	0.059	0.082	0.023
13.84	1.457	0.061	0.081	0.023
13.86	1.458	0.061	0.082	0.023
13.88	1.458	0.061	0.082	0.023
13.90	1.457	0.061	0.084	0.023
13.92	1.456	0.062	0.084	0.024
13.94	1.457	0.062	0.084	0.024
13.96	1.457	0.062	0.085	0.024
13.98	1.456	0.062	0.085	0.024
14.00	1.456	0.062	0.086	0.023
14.02	1.456	0.062	0.088	0.024
14.04	1.456	0.062	0.090	0.023
14.06	1.456	0.062	0.092	0.025
14.08	1.455	0.062	0.093	0.025
14.10	1.455	0.062	0.095	0.026
14.12	1.455	0.062	0.096	0.017
14.14	1.455	0.062	0.099	0.018
14.16	1.455	0.062	0.100	0.018
14.18	1.454	0.062	0.102	0.015
14.20	1.454	0.062	0.102	0.017
14.22	1.454	0.062	0.103	0.017
14.24	1.454	0.062	0.102	0.020
14.26	1.454	0.062	0.103	0.018
14.28	1.454	0.062	0.102	0.020
14.30	1.454	0.062	0.101	0.015
14.32	1.454	0.062	0.101	0.018
14.34	1.453	0.062	0.100	0.015
14.36	1.454	0.062	0.099	0.020
14.38	1.453	0.062	0.098	0.017
14.40	1.454	0.062	0.096	0.017
14.42	1.453	0.062	0.095	0.018
14.44	1.454	0.062	0.094	0.015
14.46	1.454	0.062	0.093	0.015
14.48	1.454	0.062	0.092	0.016
14.50	1.454	0.062	0.092	0.015
14.52	1.455	0.062	0.091	0.018
14.54	1.454	0.062	0.090	0.015
14.56	1.455	0.062	0.090	0.020
14.58	1.455	0.062	0.089	0.018
14.60	1.456	0.062	0.089	0.016
14.62	1.455	0.062	0.088	0.016
14.64	1.457	0.062	0.088	0.015
14.66	1.456	0.062	0.087	0.017
14.68	1.458	0.062	0.088	0.016
14.70	1.457	0.062	0.088	0.015
14.72	1.459	0.062	0.089	0.017
14.74	1.459	0.062	0.089	0.020
14.76	1.461	0.062	0.093	0.017
14.78	1.460	0.062	0.094	0.015
14.80	1.463	0.062	0.094	0.018
14.82	1.463	0.062	0.090	0.015
14.84	1.466	0.062	0.092	0.015
14.86	1.466	0.062	0.089	0.017
14.88	1.470	0.062	0.091	0.018
14.90	1.470	0.062	0.089	0.016
14.92	1.477	0.062	0.092	0.017
14.94	1.476	0.062	0.095	0.015
14.96	1.488	0.062	0.111	0.020
14.98	1.487	0.062	0.129	0.015
15.00	1.524	0.062	0.163	0.017
