# Supplementary material for: Global scale variability of the mineral dust longwave refractive index: a new dataset of in situ measurements for climate modelling and remote sensing
Source: Copernicus journal article supplement (doi:10.5194/acp-2016-616), 2016-10-19
Supplement: Supplementary file 1 [file acp-2016-616-supplement.zip › Supplementary_DiBiagio_ACPD/CRI_results_Bodele.txt]

wavelength(microns)	real_part(n)	imaginary_part(k)	standard_deviation(n)	standard_deviation(k)
3.00	1.459	0.004	0.004	0.001
3.02	1.451	0.004	0.048	0.001
3.04	1.451	0.004	0.003	0.001
3.06	1.447	0.004	0.017	0.001
3.08	1.447	0.004	0.003	0.001
3.10	1.445	0.004	0.011	0.001
3.12	1.445	0.004	0.003	0.001
3.14	1.442	0.004	0.008	0.001
3.16	1.442	0.004	0.003	0.001
3.18	1.441	0.004	0.006	0.001
3.20	1.441	0.004	0.003	0.001
3.22	1.439	0.004	0.005	0.001
3.24	1.439	0.004	0.003	0.001
3.26	1.437	0.004	0.005	0.001
3.28	1.437	0.004	0.003	0.001
3.30	1.436	0.004	0.004	0.001
3.32	1.436	0.004	0.003	0.001
3.34	1.434	0.004	0.004	0.001
3.36	1.434	0.004	0.003	0.001
3.38	1.433	0.004	0.004	0.001
3.40	1.433	0.004	0.002	0.001
3.42	1.432	0.004	0.004	0.001
3.44	1.432	0.004	0.002	0.001
3.46	1.431	0.004	0.004	0.001
3.48	1.431	0.004	0.003	0.001
3.50	1.429	0.004	0.003	0.001
3.52	1.429	0.004	0.003	0.001
3.54	1.428	0.004	0.003	0.001
3.56	1.428	0.004	0.003	0.001
3.58	1.427	0.004	0.003	0.001
3.60	1.427	0.004	0.003	0.001
3.62	1.426	0.004	0.003	0.001
3.64	1.426	0.004	0.003	0.001
3.66	1.425	0.004	0.003	0.001
3.68	1.425	0.004	0.002	0.001
3.70	1.424	0.004	0.003	0.001
3.72	1.424	0.004	0.003	0.001
3.74	1.423	0.004	0.003	0.001
3.76	1.423	0.004	0.003	0.001
3.78	1.422	0.004	0.003	0.001
3.80	1.422	0.004	0.003	0.001
3.82	1.421	0.004	0.003	0.001
3.84	1.421	0.004	0.002	0.001
3.86	1.420	0.004	0.003	0.001
3.88	1.420	0.004	0.003	0.001
3.90	1.419	0.004	0.003	0.001
3.92	1.419	0.004	0.003	0.001
3.94	1.418	0.004	0.003	0.001
3.96	1.418	0.004	0.003	0.001
3.98	1.417	0.004	0.003	0.001
4.00	1.417	0.004	0.003	0.001
4.02	1.416	0.004	0.003	0.001
4.04	1.416	0.004	0.003	0.001
4.06	1.415	0.004	0.003	0.001
4.08	1.415	0.004	0.003	0.001
4.10	1.414	0.004	0.003	0.001
4.12	1.414	0.004	0.003	0.001
4.14	1.413	0.004	0.003	0.001
4.16	1.413	0.004	0.003	0.001
4.18	1.412	0.004	0.003	0.001
4.20	1.412	0.004	0.003	0.001
4.22	1.411	0.004	0.003	0.001
4.24	1.411	0.004	0.003	0.001
4.26	1.410	0.004	0.003	0.001
4.28	1.410	0.004	0.003	0.001
4.30	1.410	0.004	0.003	0.001
4.32	1.409	0.004	0.003	0.001
4.34	1.409	0.004	0.003	0.001
4.36	1.409	0.004	0.003	0.001
4.38	1.408	0.004	0.003	0.001
4.40	1.408	0.004	0.003	0.001
4.42	1.407	0.004	0.003	0.001
4.44	1.407	0.004	0.003	0.001
4.46	1.406	0.004	0.003	0.001
4.48	1.406	0.004	0.003	0.001
4.50	1.405	0.004	0.003	0.001
4.52	1.405	0.004	0.003	0.001
4.54	1.404	0.004	0.003	0.001
4.56	1.404	0.004	0.003	0.001
4.58	1.403	0.004	0.003	0.001
4.60	1.403	0.004	0.003	0.001
4.62	1.402	0.004	0.003	0.001
4.64	1.402	0.004	0.003	0.001
4.66	1.401	0.004	0.003	0.001
4.68	1.401	0.004	0.003	0.001
4.70	1.400	0.004	0.003	0.001
4.72	1.400	0.004	0.003	0.001
4.74	1.399	0.004	0.003	0.001
4.76	1.399	0.004	0.003	0.001
4.78	1.399	0.004	0.003	0.001
4.80	1.398	0.004	0.004	0.001
4.82	1.398	0.004	0.004	0.001
4.84	1.397	0.004	0.004	0.001
4.86	1.397	0.004	0.004	0.001
4.88	1.397	0.004	0.003	0.001
4.90	1.396	0.004	0.003	0.001
4.92	1.396	0.004	0.004	0.001
4.94	1.395	0.004	0.004	0.001
4.96	1.395	0.004	0.004	0.001
4.98	1.394	0.004	0.004	0.001
5.00	1.394	0.004	0.004	0.001
5.02	1.393	0.004	0.004	0.001
5.04	1.393	0.004	0.004	0.001
5.06	1.392	0.004	0.003	0.001
5.08	1.392	0.004	0.003	0.001
5.10	1.391	0.004	0.004	0.001
5.12	1.391	0.004	0.004	0.001
5.14	1.390	0.004	0.004	0.001
5.16	1.390	0.004	0.004	0.001
5.18	1.389	0.004	0.004	0.001
5.20	1.389	0.004	0.004	0.001
5.22	1.388	0.004	0.004	0.001
5.24	1.388	0.004	0.004	0.001
5.26	1.387	0.004	0.004	0.001
5.28	1.387	0.004	0.004	0.001
5.30	1.386	0.004	0.004	0.001
5.32	1.386	0.004	0.004	0.001
5.34	1.385	0.004	0.004	0.001
5.36	1.385	0.004	0.004	0.001
5.38	1.384	0.004	0.004	0.001
5.40	1.384	0.004	0.004	0.001
5.42	1.383	0.004	0.004	0.001
5.44	1.383	0.004	0.004	0.001
5.46	1.382	0.004	0.004	0.001
5.48	1.382	0.004	0.004	0.001
5.50	1.381	0.004	0.004	0.001
5.52	1.381	0.004	0.004	0.001
5.54	1.380	0.004	0.004	0.001
5.56	1.380	0.004	0.004	0.001
5.58	1.379	0.004	0.004	0.001
5.60	1.378	0.004	0.004	0.001
5.62	1.378	0.004	0.004	0.001
5.64	1.377	0.004	0.004	0.001
5.66	1.377	0.004	0.004	0.001
5.68	1.376	0.004	0.004	0.001
5.70	1.375	0.004	0.005	0.001
5.72	1.375	0.004	0.004	0.001
5.74	1.374	0.004	0.004	0.001
5.76	1.374	0.004	0.004	0.001
5.78	1.373	0.004	0.004	0.001
5.80	1.373	0.004	0.004	0.001
5.82	1.372	0.004	0.004	0.001
5.84	1.372	0.004	0.005	0.001
5.86	1.371	0.004	0.004	0.001
5.88	1.370	0.004	0.004	0.001
5.90	1.370	0.004	0.005	0.001
5.92	1.369	0.004	0.004	0.001
5.94	1.368	0.004	0.004	0.001
5.96	1.368	0.004	0.004	0.001
5.98	1.367	0.004	0.004	0.001
6.00	1.367	0.004	0.004	0.001
6.02	1.366	0.004	0.004	0.001
6.04	1.365	0.004	0.005	0.001
6.06	1.365	0.004	0.005	0.001
6.08	1.364	0.004	0.004	0.001
6.10	1.363	0.004	0.004	0.001
6.12	1.363	0.004	0.004	0.001
6.14	1.362	0.004	0.004	0.001
6.16	1.361	0.004	0.004	0.001
6.18	1.361	0.004	0.004	0.001
6.20	1.360	0.004	0.005	0.001
6.22	1.359	0.004	0.005	0.001
6.24	1.359	0.004	0.005	0.001
6.26	1.358	0.004	0.005	0.001
6.28	1.357	0.004	0.005	0.001
6.30	1.356	0.004	0.005	0.001
6.32	1.356	0.004	0.005	0.001
6.34	1.355	0.004	0.004	0.001
6.36	1.354	0.004	0.005	0.001
6.38	1.353	0.004	0.005	0.001
6.40	1.353	0.004	0.005	0.001
6.42	1.352	0.004	0.004	0.001
6.44	1.351	0.004	0.005	0.001
6.46	1.350	0.004	0.005	0.001
6.48	1.350	0.004	0.005	0.001
6.50	1.349	0.004	0.005	0.001
6.52	1.348	0.004	0.005	0.001
6.54	1.348	0.004	0.005	0.001
6.56	1.347	0.003	0.005	0.001
6.58	1.345	0.003	0.005	0.001
6.60	1.344	0.003	0.005	0.001
6.62	1.343	0.004	0.005	0.001
6.64	1.342	0.003	0.005	0.001
6.66	1.340	0.004	0.006	0.001
6.68	1.341	0.004	0.005	0.001
6.70	1.339	0.004	0.006	0.001
6.72	1.339	0.004	0.005	0.001
6.74	1.337	0.004	0.006	0.001
6.76	1.337	0.004	0.005	0.001
6.78	1.335	0.003	0.006	0.001
6.80	1.334	0.004	0.006	0.001
6.82	1.333	0.004	0.006	0.001
6.84	1.332	0.004	0.006	0.001
6.86	1.331	0.004	0.006	0.001
6.88	1.330	0.004	0.006	0.001
6.90	1.329	0.004	0.006	0.001
6.92	1.328	0.004	0.006	0.001
6.94	1.327	0.004	0.006	0.001
6.96	1.326	0.004	0.006	0.001
6.98	1.325	0.004	0.006	0.001
7.00	1.323	0.004	0.006	0.001
7.02	1.322	0.004	0.006	0.001
7.04	1.321	0.004	0.006	0.001
7.06	1.320	0.004	0.006	0.001
7.08	1.318	0.004	0.006	0.001
7.10	1.317	0.004	0.006	0.001
7.12	1.316	0.004	0.006	0.001
7.14	1.314	0.004	0.006	0.001
7.16	1.313	0.004	0.006	0.001
7.18	1.312	0.004	0.006	0.001
7.20	1.310	0.004	0.007	0.001
7.22	1.309	0.004	0.007	0.001
7.24	1.307	0.004	0.007	0.001
7.26	1.306	0.004	0.007	0.001
7.28	1.305	0.004	0.007	0.001
7.30	1.303	0.003	0.007	0.001
7.32	1.300	0.003	0.007	0.001
7.34	1.299	0.003	0.007	0.001
7.36	1.297	0.003	0.007	0.001
7.38	1.295	0.003	0.007	0.001
7.40	1.293	0.003	0.007	0.001
7.42	1.291	0.003	0.007	0.001
7.44	1.288	0.003	0.007	0.001
7.46	1.286	0.003	0.007	0.001
7.48	1.284	0.003	0.007	0.001
7.50	1.281	0.003	0.007	0.001
7.52	1.278	0.003	0.007	0.001
7.54	1.276	0.004	0.007	0.001
7.56	1.274	0.004	0.008	0.001
7.58	1.272	0.003	0.008	0.001
7.60	1.268	0.003	0.008	0.001
7.62	1.265	0.004	0.008	0.001
7.64	1.263	0.004	0.008	0.001
7.66	1.259	0.003	0.008	0.001
7.68	1.254	0.004	0.008	0.001
7.70	1.252	0.004	0.008	0.001
7.72	1.246	0.004	0.009	0.001
7.74	1.242	0.007	0.009	0.001
7.76	1.239	0.008	0.009	0.001
7.78	1.235	0.008	0.009	0.001
7.80	1.228	0.009	0.009	0.001
7.82	1.224	0.013	0.009	0.001
7.84	1.220	0.012	0.010	0.001
7.86	1.212	0.015	0.010	0.001
7.88	1.208	0.020	0.010	0.001
7.90	1.202	0.023	0.010	0.001
7.92	1.197	0.029	0.011	0.001
7.94	1.194	0.032	0.010	0.001
7.96	1.188	0.038	0.011	0.001
7.98	1.186	0.044	0.011	0.001
8.00	1.181	0.049	0.011	0.001
8.02	1.180	0.056	0.011	0.002
8.04	1.177	0.060	0.012	0.002
8.06	1.175	0.068	0.011	0.002
8.08	1.175	0.072	0.011	0.002
8.10	1.174	0.077	0.012	0.003
8.12	1.172	0.081	0.012	0.002
8.14	1.171	0.087	0.012	0.003
8.16	1.171	0.090	0.012	0.003
8.18	1.170	0.095	0.012	0.003
8.20	1.168	0.097	0.012	0.003
8.22	1.166	0.103	0.012	0.004
8.24	1.166	0.106	0.012	0.004
8.26	1.164	0.110	0.012	0.004
8.28	1.163	0.114	0.012	0.004
8.30	1.161	0.118	0.012	0.004
8.32	1.160	0.122	0.012	0.004
8.34	1.158	0.125	0.013	0.004
8.36	1.155	0.129	0.013	0.004
8.38	1.154	0.134	0.013	0.005
8.40	1.151	0.137	0.013	0.004
8.42	1.149	0.143	0.014	0.005
8.44	1.147	0.147	0.013	0.005
8.46	1.146	0.152	0.013	0.005
8.48	1.143	0.154	0.013	0.005
8.50	1.138	0.160	0.014	0.006
8.52	1.136	0.165	0.014	0.006
8.54	1.132	0.171	0.014	0.006
8.56	1.129	0.177	0.014	0.006
8.58	1.126	0.183	0.014	0.006
8.60	1.122	0.188	0.015	0.006
8.62	1.117	0.196	0.015	0.007
8.64	1.113	0.203	0.015	0.007
8.66	1.108	0.212	0.016	0.008
8.68	1.105	0.220	0.015	0.008
8.70	1.098	0.229	0.016	0.008
8.72	1.094	0.241	0.016	0.009
8.74	1.089	0.252	0.016	0.009
8.76	1.084	0.265	0.016	0.010
8.78	1.079	0.280	0.017	0.011
8.80	1.076	0.297	0.017	0.012
8.82	1.074	0.314	0.017	0.012
8.84	1.073	0.334	0.017	0.013
8.86	1.075	0.354	0.017	0.014
8.88	1.077	0.375	0.017	0.014
8.90	1.083	0.397	0.016	0.015
8.92	1.091	0.419	0.016	0.016
8.94	1.102	0.441	0.016	0.017
8.96	1.115	0.462	0.015	0.018
8.98	1.131	0.483	0.015	0.019
9.00	1.150	0.501	0.014	0.020
9.02	1.170	0.517	0.013	0.020
9.04	1.192	0.531	0.013	0.022
9.06	1.216	0.542	0.011	0.022
9.08	1.239	0.550	0.011	0.022
9.10	1.264	0.556	0.010	0.023
9.12	1.286	0.558	0.009	0.023
9.14	1.308	0.561	0.008	0.023
9.16	1.331	0.560	0.007	0.023
9.18	1.351	0.556	0.006	0.023
9.20	1.367	0.552	0.005	0.023
9.22	1.384	0.549	0.004	0.023
9.24	1.398	0.545	0.004	0.023
9.26	1.413	0.542	0.003	0.023
9.28	1.426	0.537	0.003	0.022
9.30	1.439	0.536	0.002	0.023
9.32	1.453	0.532	0.002	0.023
9.34	1.466	0.530	0.002	0.023
9.36	1.479	0.526	0.001	0.022
9.38	1.491	0.525	0.002	0.023
9.40	1.507	0.522	0.002	0.022
9.42	1.520	0.519	0.003	0.022
9.44	1.537	0.515	0.004	0.022
9.46	1.551	0.509	0.004	0.022
9.48	1.566	0.504	0.005	0.021
9.50	1.582	0.497	0.005	0.021
9.52	1.597	0.490	0.006	0.021
9.54	1.613	0.481	0.007	0.021
9.56	1.627	0.470	0.008	0.020
9.58	1.642	0.461	0.008	0.019
9.60	1.657	0.448	0.009	0.019
9.62	1.671	0.433	0.010	0.018
9.64	1.683	0.417	0.010	0.017
9.66	1.694	0.400	0.011	0.017
9.68	1.701	0.381	0.011	0.016
9.70	1.709	0.364	0.011	0.015
9.72	1.711	0.343	0.012	0.014
9.74	1.711	0.328	0.011	0.013
9.76	1.712	0.311	0.011	0.012
9.78	1.709	0.298	0.011	0.012
9.80	1.709	0.285	0.011	0.011
9.82	1.706	0.274	0.011	0.010
9.84	1.705	0.264	0.011	0.010
9.86	1.704	0.254	0.011	0.009
9.88	1.702	0.245	0.011	0.009
9.90	1.702	0.238	0.010	0.008
9.92	1.703	0.228	0.010	0.008
9.94	1.703	0.220	0.010	0.008
9.96	1.705	0.209	0.010	0.007
9.98	1.704	0.197	0.010	0.007
10.00	1.702	0.187	0.010	0.006
10.02	1.701	0.176	0.010	0.006
10.04	1.698	0.165	0.010	0.006
10.06	1.694	0.155	0.010	0.005
10.08	1.690	0.144	0.009	0.005
10.10	1.684	0.135	0.009	0.004
10.12	1.678	0.127	0.008	0.004
10.14	1.674	0.120	0.009	0.004
10.16	1.668	0.111	0.008	0.004
10.18	1.660	0.105	0.008	0.003
10.20	1.654	0.099	0.007	0.003
10.22	1.648	0.095	0.007	0.003
10.24	1.642	0.089	0.007	0.003
10.26	1.634	0.086	0.007	0.003
10.28	1.630	0.083	0.007	0.003
10.30	1.625	0.079	0.007	0.002
10.32	1.618	0.076	0.006	0.002
10.34	1.614	0.074	0.006	0.002
10.36	1.609	0.070	0.006	0.002
10.38	1.603	0.069	0.006	0.002
10.40	1.598	0.066	0.005	0.002
10.42	1.592	0.066	0.005	0.002
10.44	1.589	0.064	0.005	0.002
10.46	1.583	0.063	0.005	0.002
10.48	1.580	0.062	0.004	0.002
10.50	1.575	0.061	0.004	0.002
10.52	1.570	0.061	0.004	0.002
10.54	1.567	0.062	0.004	0.002
10.56	1.564	0.060	0.004	0.002
10.58	1.559	0.062	0.004	0.002
10.60	1.558	0.061	0.004	0.002
10.62	1.554	0.061	0.004	0.002
10.64	1.552	0.061	0.003	0.002
10.66	1.547	0.061	0.003	0.002
10.68	1.545	0.064	0.003	0.002
10.70	1.544	0.064	0.003	0.002
10.72	1.541	0.064	0.003	0.002
10.74	1.539	0.065	0.003	0.002
10.76	1.537	0.065	0.003	0.002
10.78	1.535	0.067	0.003	0.002
10.80	1.534	0.068	0.003	0.002
10.82	1.532	0.070	0.003	0.002
10.84	1.532	0.072	0.002	0.002
10.86	1.532	0.073	0.002	0.002
10.88	1.533	0.074	0.003	0.002
10.90	1.533	0.075	0.003	0.002
10.92	1.535	0.075	0.003	0.002
10.94	1.535	0.075	0.003	0.002
10.96	1.538	0.075	0.003	0.002
10.98	1.539	0.073	0.002	0.002
11.00	1.541	0.072	0.002	0.002
11.02	1.541	0.068	0.003	0.002
11.04	1.541	0.067	0.002	0.002
11.06	1.542	0.064	0.002	0.002
11.08	1.541	0.061	0.003	0.002
11.10	1.540	0.058	0.002	0.002
11.12	1.538	0.055	0.003	0.002
11.14	1.536	0.054	0.002	0.001
11.16	1.535	0.052	0.002	0.002
11.18	1.533	0.050	0.003	0.001
11.20	1.531	0.049	0.002	0.002
11.22	1.529	0.048	0.002	0.001
11.24	1.528	0.047	0.002	0.001
11.26	1.526	0.046	0.002	0.001
11.28	1.525	0.046	0.002	0.001
11.30	1.524	0.044	0.002	0.001
11.32	1.521	0.043	0.002	0.001
11.34	1.519	0.043	0.002	0.001
11.36	1.518	0.043	0.002	0.001
11.38	1.518	0.043	0.002	0.001
11.40	1.516	0.041	0.002	0.001
11.42	1.515	0.041	0.002	0.001
11.44	1.514	0.040	0.002	0.001
11.46	1.512	0.040	0.002	0.001
11.48	1.512	0.039	0.002	0.001
11.50	1.510	0.038	0.001	0.001
11.52	1.509	0.038	0.001	0.001
11.54	1.508	0.037	0.002	0.001
11.56	1.506	0.036	0.001	0.001
11.58	1.505	0.036	0.001	0.001
11.60	1.504	0.035	0.001	0.001
11.62	1.502	0.035	0.001	0.001
11.64	1.501	0.034	0.001	0.001
11.66	1.499	0.033	0.001	0.001
11.68	1.498	0.033	0.001	0.001
11.70	1.497	0.033	0.001	0.001
11.72	1.496	0.031	0.001	0.001
11.74	1.493	0.031	0.001	0.001
11.76	1.491	0.031	0.001	0.001
11.78	1.489	0.031	0.001	0.001
11.80	1.488	0.031	0.001	0.001
11.82	1.486	0.031	0.001	0.001
11.84	1.484	0.031	0.001	0.001
11.86	1.482	0.032	0.001	0.001
11.88	1.481	0.033	0.001	0.001
11.90	1.481	0.033	0.001	0.001
11.92	1.479	0.033	0.001	0.001
11.94	1.478	0.034	0.001	0.001
11.96	1.477	0.034	0.001	0.001
11.98	1.475	0.035	0.001	0.001
12.00	1.474	0.035	0.001	0.001
12.02	1.472	0.036	0.001	0.001
12.04	1.472	0.037	0.001	0.001
12.06	1.471	0.038	0.001	0.001
12.08	1.470	0.039	0.001	0.001
12.10	1.470	0.040	0.001	0.001
12.12	1.470	0.040	0.001	0.001
12.14	1.469	0.040	0.001	0.001
12.16	1.467	0.041	0.001	0.001
12.18	1.467	0.042	0.001	0.001
12.20	1.466	0.043	0.001	0.001
12.22	1.466	0.045	0.001	0.001
12.24	1.466	0.045	0.001	0.001
12.26	1.466	0.046	0.001	0.001
12.28	1.466	0.046	0.001	0.001
12.30	1.465	0.047	0.001	0.001
12.32	1.465	0.048	0.001	0.001
12.34	1.464	0.049	0.001	0.001
12.36	1.465	0.050	0.001	0.001
12.38	1.464	0.051	0.001	0.001
12.40	1.465	0.052	0.001	0.001
12.42	1.465	0.053	0.001	0.001
12.44	1.466	0.054	0.001	0.002
12.46	1.466	0.055	0.001	0.002
12.48	1.468	0.056	0.001	0.001
12.50	1.469	0.056	0.001	0.001
12.52	1.470	0.056	0.001	0.002
12.54	1.471	0.056	0.001	0.001
12.56	1.472	0.056	0.001	0.001
12.58	1.472	0.056	0.001	0.001
12.60	1.474	0.056	0.001	0.001
12.62	1.474	0.055	0.001	0.002
12.64	1.475	0.055	0.001	0.002
12.66	1.477	0.054	0.001	0.002
12.68	1.477	0.053	0.001	0.001
12.70	1.477	0.052	0.001	0.001
12.72	1.478	0.052	0.001	0.001
12.74	1.479	0.051	0.001	0.001
12.76	1.479	0.049	0.001	0.001
12.78	1.478	0.049	0.001	0.001
12.80	1.480	0.048	0.001	0.001
12.82	1.479	0.047	0.001	0.001
12.84	1.480	0.046	0.001	0.001
12.86	1.480	0.044	0.001	0.001
12.88	1.479	0.043	0.001	0.001
12.90	1.479	0.042	0.001	0.001
12.92	1.479	0.041	0.001	0.001
12.94	1.477	0.040	0.001	0.001
12.96	1.477	0.040	0.001	0.001
12.98	1.477	0.039	0.001	0.001
13.00	1.477	0.038	0.001	0.001
13.02	1.476	0.036	0.001	0.001
13.04	1.474	0.036	0.001	0.001
13.06	1.474	0.036	0.001	0.001
13.08	1.474	0.035	0.001	0.001
13.10	1.472	0.035	0.001	0.001
13.12	1.472	0.035	0.001	0.001
13.14	1.472	0.034	0.001	0.001
13.16	1.471	0.034	0.001	0.001
13.18	1.471	0.034	0.001	0.001
13.20	1.470	0.033	0.001	0.001
13.22	1.469	0.033	0.001	0.001
13.24	1.469	0.033	0.001	0.001
13.26	1.468	0.033	0.001	0.001
13.28	1.468	0.033	0.001	0.001
13.30	1.467	0.033	0.001	0.001
13.32	1.467	0.033	0.001	0.001
13.34	1.467	0.033	0.001	0.001
13.36	1.467	0.032	0.001	0.001
13.38	1.466	0.032	0.001	0.001
13.40	1.467	0.032	0.001	0.001
13.42	1.466	0.031	0.001	0.001
13.44	1.466	0.031	0.001	0.001
13.46	1.466	0.031	0.001	0.001
13.48	1.467	0.030	0.001	0.001
13.50	1.465	0.028	0.001	0.001
13.52	1.464	0.028	0.001	0.001
13.54	1.463	0.028	0.001	0.001
13.56	1.463	0.028	0.001	0.001
13.58	1.462	0.028	0.001	0.001
13.60	1.462	0.028	0.001	0.001
13.62	1.461	0.027	0.001	0.001
13.64	1.461	0.027	0.001	0.001
13.66	1.460	0.027	0.001	0.001
13.68	1.460	0.027	0.001	0.001
13.70	1.459	0.026	0.001	0.001
13.72	1.459	0.026	0.002	0.001
13.74	1.458	0.026	0.001	0.001
13.76	1.459	0.026	0.002	0.001
13.78	1.458	0.024	0.002	0.001
13.80	1.457	0.024	0.002	0.001
13.82	1.456	0.023	0.002	0.001
13.84	1.454	0.023	0.002	0.001
13.86	1.453	0.023	0.002	0.001
13.88	1.452	0.023	0.002	0.001
13.90	1.450	0.023	0.002	0.001
13.92	1.449	0.026	0.002	0.001
13.94	1.450	0.026	0.002	0.001
13.96	1.449	0.026	0.002	0.001
13.98	1.449	0.026	0.002	0.001
14.00	1.449	0.026	0.002	0.001
14.02	1.448	0.026	0.002	0.001
14.04	1.448	0.026	0.002	0.001
14.06	1.446	0.026	0.002	0.001
14.08	1.446	0.027	0.002	0.001
14.10	1.443	0.027	0.002	0.001
14.12	1.443	0.031	0.002	0.001
14.14	1.445	0.031	0.002	0.001
14.16	1.445	0.032	0.002	0.001
14.18	1.446	0.030	0.002	0.001
14.20	1.442	0.031	0.002	0.001
14.22	1.443	0.035	0.002	0.001
14.24	1.445	0.035	0.002	0.001
14.26	1.446	0.036	0.002	0.001
14.28	1.448	0.036	0.002	0.001
14.30	1.448	0.036	0.002	0.001
14.32	1.450	0.036	0.002	0.001
14.34	1.450	0.034	0.002	0.001
14.36	1.450	0.034	0.002	0.001
14.38	1.448	0.034	0.002	0.001
14.40	1.450	0.037	0.002	0.001
14.42	1.453	0.034	0.002	0.001
14.44	1.451	0.034	0.002	0.001
14.46	1.452	0.034	0.002	0.001
14.48	1.452	0.034	0.002	0.001
14.50	1.453	0.033	0.002	0.001
14.52	1.453	0.033	0.003	0.001
14.54	1.454	0.033	0.002	0.001
14.56	1.455	0.033	0.003	0.001
14.58	1.456	0.031	0.002	0.001
14.60	1.455	0.031	0.003	0.001
14.62	1.456	0.030	0.002	0.001
14.64	1.456	0.029	0.003	0.001
14.66	1.456	0.028	0.002	0.001
14.68	1.456	0.028	0.003	0.001
14.70	1.456	0.027	0.003	0.001
14.72	1.456	0.027	0.003	0.001
14.74	1.456	0.027	0.003	0.001
14.76	1.457	0.027	0.004	0.001
14.78	1.458	0.026	0.003	0.001
14.80	1.460	0.026	0.004	0.001
14.82	1.462	0.022	0.003	0.001
14.84	1.461	0.020	0.005	0.001
14.86	1.462	0.017	0.003	0.002
14.88	1.459	0.013	0.006	0.002
14.90	1.457	0.015	0.003	0.002
14.92	1.458	0.012	0.009	0.002
14.94	1.454	0.011	0.003	0.002
14.96	1.454	0.012	0.015	0.002
14.98	1.451	0.013	0.003	0.002
15.00	1.458	0.016	0.047	0.002
