# Supplementary material for: Global scale variability of the mineral dust longwave refractive index: a new dataset of in situ measurements for climate modelling and remote sensing
Source: Copernicus journal article supplement (doi:10.5194/acp-2016-616), 2016-10-19
Supplement: Supplementary file 1 [file acp-2016-616-supplement.zip › Supplementary_DiBiagio_ACPD/CRI_results_Ethiopia.txt]

wavelength(microns)	real_part(n)	imaginary_part(k)	standard_deviation(n)	standard_deviation(k)
3.00	1.488	0.015	0.014	0.005
3.02	1.487	0.015	0.034	0.005
3.04	1.487	0.015	0.008	0.005
3.06	1.486	0.015	0.015	0.005
3.08	1.487	0.015	0.007	0.005
3.10	1.486	0.015	0.016	0.005
3.12	1.486	0.015	0.011	0.005
3.14	1.486	0.015	0.016	0.005
3.16	1.486	0.015	0.011	0.005
3.18	1.486	0.015	0.015	0.005
3.20	1.486	0.015	0.010	0.008
3.22	1.485	0.015	0.013	0.006
3.24	1.485	0.015	0.008	0.005
3.26	1.485	0.015	0.011	0.004
3.28	1.485	0.015	0.006	0.003
3.30	1.485	0.015	0.009	0.003
3.32	1.485	0.015	0.005	0.003
3.34	1.485	0.015	0.007	0.002
3.36	1.485	0.015	0.004	0.002
3.38	1.484	0.015	0.006	0.002
3.40	1.484	0.015	0.003	0.002
3.42	1.484	0.015	0.005	0.002
3.44	1.484	0.015	0.003	0.002
3.46	1.484	0.015	0.004	0.002
3.48	1.484	0.015	0.002	0.002
3.50	1.484	0.015	0.003	0.002
3.52	1.484	0.015	0.002	0.002
3.54	1.483	0.015	0.002	0.002
3.56	1.483	0.015	0.002	0.002
3.58	1.483	0.015	0.002	0.002
3.60	1.483	0.015	0.002	0.002
3.62	1.483	0.015	0.002	0.002
3.64	1.483	0.015	0.002	0.002
3.66	1.483	0.015	0.001	0.002
3.68	1.483	0.015	0.002	0.002
3.70	1.483	0.015	0.001	0.002
3.72	1.483	0.015	0.002	0.002
3.74	1.483	0.015	0.001	0.002
3.76	1.483	0.015	0.002	0.002
3.78	1.483	0.015	0.001	0.002
3.80	1.483	0.015	0.002	0.002
3.82	1.483	0.014	0.001	0.001
3.84	1.483	0.015	0.003	0.002
3.86	1.483	0.015	0.002	0.002
3.88	1.483	0.015	0.003	0.002
3.90	1.483	0.015	0.002	0.002
3.92	1.483	0.015	0.003	0.002
3.94	1.483	0.014	0.002	0.001
3.96	1.483	0.015	0.003	0.002
3.98	1.483	0.014	0.002	0.001
4.00	1.483	0.015	0.003	0.002
4.02	1.483	0.014	0.002	0.001
4.04	1.483	0.014	0.003	0.001
4.06	1.483	0.014	0.002	0.001
4.08	1.483	0.014	0.003	0.002
4.10	1.484	0.014	0.002	0.002
4.12	1.484	0.012	0.003	0.001
4.14	1.484	0.012	0.002	0.001
4.16	1.484	0.011	0.003	0.001
4.18	1.483	0.011	0.003	0.001
4.20	1.484	0.010	0.004	0.001
4.22	1.483	0.009	0.003	0.001
4.24	1.482	0.009	0.004	0.001
4.26	1.481	0.007	0.004	0.001
4.28	1.480	0.008	0.005	0.001
4.30	1.479	0.007	0.004	0.001
4.32	1.477	0.008	0.005	0.001
4.34	1.476	0.008	0.005	0.001
4.36	1.475	0.010	0.006	0.001
4.38	1.476	0.011	0.005	0.001
4.40	1.476	0.011	0.006	0.001
4.42	1.475	0.012	0.005	0.001
4.44	1.476	0.012	0.006	0.001
4.46	1.475	0.013	0.005	0.002
4.48	1.476	0.013	0.006	0.002
4.50	1.476	0.013	0.005	0.002
4.52	1.477	0.013	0.006	0.002
4.54	1.477	0.013	0.005	0.002
4.56	1.477	0.013	0.006	0.002
4.58	1.477	0.013	0.005	0.002
4.60	1.477	0.013	0.006	0.002
4.62	1.477	0.013	0.005	0.002
4.64	1.478	0.013	0.006	0.002
4.66	1.477	0.012	0.005	0.002
4.68	1.478	0.013	0.006	0.002
4.70	1.478	0.012	0.005	0.002
4.72	1.478	0.012	0.006	0.002
4.74	1.477	0.011	0.005	0.002
4.76	1.477	0.011	0.006	0.002
4.78	1.477	0.011	0.005	0.002
4.80	1.477	0.011	0.006	0.002
4.82	1.476	0.011	0.005	0.002
4.84	1.476	0.011	0.006	0.002
4.86	1.476	0.011	0.005	0.002
4.88	1.476	0.011	0.006	0.002
4.90	1.476	0.011	0.005	0.002
4.92	1.476	0.011	0.006	0.002
4.94	1.476	0.011	0.005	0.002
4.96	1.476	0.011	0.006	0.002
4.98	1.477	0.011	0.005	0.002
5.00	1.476	0.011	0.006	0.001
5.02	1.476	0.011	0.006	0.001
5.04	1.476	0.010	0.006	0.001
5.06	1.476	0.010	0.006	0.001
5.08	1.476	0.010	0.006	0.001
5.10	1.476	0.009	0.006	0.001
5.12	1.475	0.010	0.007	0.002
5.14	1.475	0.010	0.006	0.002
5.16	1.475	0.009	0.006	0.002
5.18	1.475	0.009	0.006	0.002
5.20	1.475	0.009	0.007	0.002
5.22	1.475	0.009	0.006	0.002
5.24	1.475	0.009	0.006	0.002
5.26	1.475	0.008	0.006	0.001
5.28	1.475	0.008	0.007	0.001
5.30	1.475	0.008	0.006	0.001
5.32	1.474	0.008	0.007	0.001
5.34	1.474	0.008	0.006	0.001
5.36	1.474	0.008	0.007	0.001
5.38	1.473	0.007	0.006	0.001
5.40	1.473	0.007	0.007	0.001
5.42	1.473	0.007	0.007	0.001
5.44	1.474	0.008	0.007	0.001
5.46	1.474	0.006	0.006	0.001
5.48	1.473	0.006	0.007	0.001
5.50	1.473	0.006	0.007	0.001
5.52	1.473	0.006	0.007	0.001
5.54	1.472	0.006	0.007	0.001
5.56	1.472	0.006	0.007	0.001
5.58	1.472	0.005	0.007	0.001
5.60	1.472	0.005	0.007	0.001
5.62	1.472	0.004	0.007	0.001
5.64	1.471	0.004	0.007	0.001
5.66	1.470	0.004	0.007	0.001
5.68	1.470	0.004	0.008	0.001
5.70	1.470	0.004	0.007	0.001
5.72	1.470	0.003	0.008	0.000
5.74	1.469	0.003	0.007	0.000
5.76	1.469	0.003	0.008	0.000
5.78	1.469	0.001	0.007	0.001
5.80	1.467	0.001	0.008	0.001
5.82	1.467	0.001	0.008	0.001
5.84	1.466	0.001	0.009	0.001
5.86	1.465	0.001	0.008	0.001
5.88	1.465	0.001	0.009	0.001
5.90	1.464	0.001	0.009	0.001
5.92	1.464	0.001	0.009	0.001
5.94	1.463	0.001	0.009	0.001
5.96	1.462	0.001	0.009	0.001
5.98	1.461	0.001	0.009	0.001
6.00	1.461	0.002	0.010	0.001
6.02	1.460	0.001	0.010	0.001
6.04	1.459	0.002	0.010	0.000
6.06	1.458	0.003	0.010	0.001
6.08	1.457	0.003	0.011	0.001
6.10	1.457	0.004	0.010	0.000
6.12	1.457	0.005	0.011	0.001
6.14	1.456	0.005	0.011	0.001
6.16	1.455	0.007	0.011	0.001
6.18	1.456	0.008	0.011	0.002
6.20	1.456	0.009	0.011	0.002
6.22	1.458	0.011	0.010	0.002
6.24	1.460	0.012	0.010	0.002
6.26	1.462	0.011	0.009	0.002
6.28	1.463	0.010	0.009	0.002
6.30	1.465	0.008	0.009	0.002
6.32	1.464	0.004	0.009	0.001
6.34	1.463	0.004	0.009	0.001
6.36	1.463	0.003	0.009	0.001
6.38	1.461	0.002	0.010	0.001
6.40	1.460	0.001	0.010	0.000
6.42	1.459	0.001	0.010	0.000
6.44	1.458	0.001	0.011	0.000
6.46	1.457	0.001	0.011	0.000
6.48	1.456	0.001	0.011	0.000
6.50	1.455	0.001	0.011	0.000
6.52	1.455	0.001	0.011	0.000
6.54	1.454	0.001	0.011	0.000
6.56	1.453	0.001	0.011	0.000
6.58	1.453	0.001	0.011	0.000
6.60	1.452	0.001	0.012	0.000
6.62	1.451	0.001	0.012	0.000
6.64	1.450	0.001	0.012	0.000
6.66	1.450	0.001	0.012	0.000
6.68	1.449	0.001	0.012	0.000
6.70	1.448	0.001	0.013	0.000
6.72	1.447	0.001	0.013	0.001
6.74	1.445	0.002	0.013	0.001
6.76	1.445	0.003	0.014	0.001
6.78	1.445	0.003	0.013	0.000
6.80	1.443	0.004	0.014	0.001
6.82	1.442	0.004	0.014	0.001
6.84	1.441	0.007	0.014	0.001
6.86	1.443	0.007	0.014	0.001
6.88	1.441	0.007	0.014	0.001
6.90	1.442	0.009	0.014	0.002
6.92	1.442	0.008	0.014	0.002
6.94	1.442	0.009	0.014	0.002
6.96	1.442	0.009	0.014	0.002
6.98	1.442	0.010	0.014	0.002
7.00	1.442	0.011	0.014	0.003
7.02	1.442	0.011	0.014	0.003
7.04	1.443	0.011	0.014	0.003
7.06	1.444	0.011	0.014	0.003
7.08	1.443	0.010	0.014	0.002
7.10	1.443	0.010	0.014	0.002
7.12	1.442	0.010	0.014	0.003
7.14	1.443	0.011	0.014	0.003
7.16	1.443	0.010	0.014	0.003
7.18	1.442	0.010	0.014	0.003
7.20	1.442	0.010	0.014	0.003
7.22	1.442	0.009	0.014	0.002
7.24	1.440	0.009	0.014	0.003
7.26	1.440	0.010	0.014	0.003
7.28	1.440	0.010	0.014	0.003
7.30	1.439	0.009	0.014	0.003
7.32	1.439	0.009	0.014	0.003
7.34	1.438	0.009	0.014	0.003
7.36	1.438	0.010	0.014	0.003
7.38	1.437	0.009	0.014	0.003
7.40	1.436	0.010	0.015	0.003
7.42	1.437	0.010	0.014	0.003
7.44	1.436	0.010	0.014	0.003
7.46	1.436	0.011	0.014	0.003
7.48	1.436	0.010	0.014	0.003
7.50	1.435	0.010	0.014	0.003
7.52	1.435	0.010	0.014	0.003
7.54	1.434	0.010	0.015	0.003
7.56	1.434	0.010	0.015	0.003
7.58	1.433	0.010	0.015	0.003
7.60	1.433	0.010	0.015	0.003
7.62	1.432	0.010	0.015	0.003
7.64	1.432	0.009	0.015	0.003
7.66	1.431	0.009	0.015	0.003
7.68	1.430	0.009	0.015	0.003
7.70	1.429	0.008	0.015	0.003
7.72	1.428	0.008	0.015	0.003
7.74	1.428	0.009	0.015	0.003
7.76	1.427	0.008	0.015	0.002
7.78	1.425	0.008	0.016	0.002
7.80	1.424	0.008	0.016	0.002
7.82	1.422	0.008	0.016	0.002
7.84	1.421	0.008	0.016	0.002
7.86	1.419	0.008	0.017	0.002
7.88	1.417	0.009	0.017	0.003
7.90	1.416	0.010	0.017	0.003
7.92	1.414	0.009	0.017	0.002
7.94	1.412	0.010	0.017	0.003
7.96	1.411	0.011	0.018	0.003
7.98	1.409	0.012	0.018	0.003
8.00	1.408	0.014	0.018	0.003
8.02	1.406	0.015	0.019	0.003
8.04	1.405	0.016	0.019	0.004
8.06	1.403	0.018	0.019	0.004
8.08	1.402	0.020	0.019	0.004
8.10	1.402	0.022	0.019	0.004
8.12	1.402	0.023	0.019	0.004
8.14	1.401	0.024	0.019	0.004
8.16	1.400	0.026	0.019	0.005
8.18	1.400	0.026	0.019	0.005
8.20	1.399	0.028	0.020	0.005
8.22	1.399	0.029	0.020	0.005
8.24	1.399	0.030	0.020	0.005
8.26	1.398	0.030	0.020	0.005
8.28	1.397	0.032	0.020	0.006
8.30	1.396	0.033	0.020	0.006
8.32	1.395	0.034	0.020	0.006
8.34	1.394	0.036	0.020	0.006
8.36	1.393	0.037	0.020	0.007
8.38	1.393	0.039	0.021	0.007
8.40	1.392	0.040	0.021	0.007
8.42	1.391	0.041	0.021	0.007
8.44	1.390	0.042	0.021	0.007
8.46	1.389	0.044	0.021	0.007
8.48	1.389	0.046	0.021	0.008
8.50	1.389	0.046	0.021	0.008
8.52	1.387	0.048	0.021	0.008
8.54	1.386	0.050	0.022	0.009
8.56	1.385	0.051	0.022	0.009
8.58	1.385	0.054	0.022	0.009
8.60	1.384	0.055	0.022	0.009
8.62	1.383	0.058	0.022	0.010
8.64	1.383	0.060	0.022	0.010
8.66	1.382	0.061	0.022	0.010
8.68	1.381	0.063	0.022	0.010
8.70	1.381	0.066	0.022	0.011
8.72	1.381	0.068	0.022	0.011
8.74	1.380	0.070	0.022	0.011
8.76	1.379	0.073	0.022	0.012
8.78	1.379	0.075	0.022	0.012
8.80	1.378	0.077	0.022	0.012
8.82	1.378	0.080	0.022	0.013
8.84	1.378	0.082	0.022	0.013
8.86	1.377	0.085	0.022	0.013
8.88	1.376	0.088	0.022	0.014
8.90	1.376	0.092	0.023	0.014
8.92	1.376	0.095	0.022	0.014
8.94	1.376	0.099	0.023	0.015
8.96	1.377	0.103	0.022	0.016
8.98	1.378	0.107	0.022	0.016
9.00	1.379	0.110	0.022	0.017
9.02	1.380	0.114	0.022	0.017
9.04	1.382	0.117	0.022	0.018
9.06	1.384	0.121	0.021	0.018
9.08	1.386	0.123	0.021	0.018
9.10	1.387	0.127	0.021	0.019
9.12	1.389	0.129	0.021	0.019
9.14	1.391	0.133	0.021	0.020
9.16	1.394	0.135	0.020	0.020
9.18	1.395	0.138	0.020	0.020
9.20	1.397	0.141	0.019	0.021
9.22	1.399	0.144	0.019	0.021
9.24	1.401	0.147	0.019	0.021
9.26	1.403	0.149	0.019	0.022
9.28	1.405	0.153	0.018	0.022
9.30	1.407	0.157	0.019	0.023
9.32	1.410	0.161	0.018	0.023
9.34	1.414	0.164	0.018	0.024
9.36	1.417	0.169	0.017	0.024
9.38	1.422	0.173	0.017	0.025
9.40	1.426	0.176	0.016	0.025
9.42	1.431	0.180	0.015	0.026
9.44	1.437	0.183	0.014	0.026
9.46	1.444	0.186	0.014	0.027
9.48	1.450	0.188	0.012	0.027
9.50	1.457	0.190	0.012	0.027
9.52	1.464	0.190	0.011	0.027
9.54	1.472	0.191	0.010	0.027
9.56	1.478	0.189	0.009	0.027
9.58	1.485	0.189	0.008	0.027
9.60	1.493	0.186	0.007	0.026
9.62	1.498	0.184	0.007	0.026
9.64	1.505	0.182	0.006	0.025
9.66	1.510	0.178	0.006	0.025
9.68	1.517	0.175	0.006	0.024
9.70	1.520	0.170	0.006	0.023
9.72	1.525	0.166	0.005	0.022
9.74	1.529	0.161	0.006	0.021
9.76	1.531	0.157	0.006	0.021
9.78	1.533	0.153	0.006	0.020
9.80	1.535	0.149	0.006	0.020
9.82	1.537	0.145	0.006	0.019
9.84	1.539	0.140	0.006	0.018
9.86	1.539	0.137	0.007	0.018
9.88	1.540	0.135	0.007	0.018
9.90	1.540	0.132	0.007	0.017
9.92	1.541	0.130	0.007	0.017
9.94	1.542	0.127	0.007	0.017
9.96	1.543	0.126	0.007	0.017
9.98	1.545	0.124	0.007	0.017
10.00	1.546	0.122	0.007	0.017
10.02	1.548	0.121	0.007	0.017
10.04	1.550	0.118	0.007	0.017
10.06	1.552	0.116	0.006	0.017
10.08	1.554	0.113	0.006	0.017
10.10	1.556	0.111	0.006	0.017
10.12	1.559	0.108	0.006	0.016
10.14	1.560	0.104	0.006	0.015
10.16	1.562	0.100	0.006	0.015
10.18	1.563	0.095	0.005	0.014
10.20	1.563	0.092	0.006	0.013
10.22	1.564	0.088	0.005	0.013
10.24	1.564	0.084	0.005	0.012
10.26	1.563	0.080	0.005	0.011
10.28	1.562	0.076	0.005	0.011
10.30	1.559	0.073	0.005	0.010
10.32	1.560	0.072	0.005	0.010
10.34	1.560	0.067	0.005	0.010
10.36	1.557	0.064	0.005	0.009
10.38	1.556	0.063	0.006	0.009
10.40	1.555	0.060	0.006	0.009
10.42	1.554	0.058	0.006	0.009
10.44	1.552	0.056	0.006	0.008
10.46	1.551	0.054	0.006	0.008
10.48	1.550	0.052	0.006	0.008
10.50	1.548	0.050	0.006	0.008
10.52	1.546	0.049	0.007	0.008
10.54	1.545	0.048	0.007	0.008
10.56	1.544	0.047	0.007	0.008
10.58	1.543	0.046	0.007	0.008
10.60	1.542	0.045	0.007	0.008
10.62	1.541	0.044	0.008	0.008
10.64	1.540	0.043	0.008	0.009
10.66	1.540	0.042	0.008	0.009
10.68	1.539	0.040	0.008	0.009
10.70	1.538	0.038	0.008	0.009
10.72	1.536	0.037	0.008	0.009
10.74	1.534	0.036	0.008	0.009
10.76	1.533	0.035	0.008	0.009
10.78	1.531	0.034	0.008	0.009
10.80	1.530	0.034	0.008	0.009
10.82	1.528	0.034	0.008	0.009
10.84	1.527	0.033	0.008	0.009
10.86	1.526	0.033	0.008	0.009
10.88	1.526	0.033	0.008	0.009
10.90	1.525	0.032	0.009	0.010
10.92	1.523	0.032	0.008	0.010
10.94	1.522	0.032	0.008	0.009
10.96	1.522	0.032	0.008	0.009
10.98	1.522	0.032	0.008	0.010
11.00	1.521	0.031	0.008	0.009
11.02	1.520	0.030	0.008	0.010
11.04	1.519	0.031	0.008	0.010
11.06	1.519	0.030	0.008	0.010
11.08	1.517	0.030	0.008	0.010
11.10	1.518	0.030	0.009	0.010
11.12	1.517	0.029	0.008	0.010
11.14	1.516	0.029	0.009	0.010
11.16	1.515	0.029	0.008	0.010
11.18	1.515	0.029	0.009	0.010
11.20	1.513	0.029	0.009	0.010
11.22	1.513	0.029	0.009	0.010
11.24	1.513	0.029	0.008	0.010
11.26	1.512	0.029	0.009	0.010
11.28	1.511	0.029	0.008	0.010
11.30	1.511	0.029	0.009	0.010
11.32	1.511	0.028	0.008	0.010
11.34	1.510	0.028	0.009	0.010
11.36	1.509	0.028	0.009	0.010
11.38	1.508	0.029	0.009	0.010
11.40	1.509	0.029	0.009	0.010
11.42	1.509	0.028	0.009	0.010
11.44	1.507	0.029	0.009	0.010
11.46	1.507	0.029	0.009	0.010
11.48	1.508	0.029	0.009	0.010
11.50	1.507	0.029	0.009	0.011
11.52	1.507	0.029	0.009	0.011
11.54	1.507	0.028	0.009	0.011
11.56	1.507	0.029	0.008	0.011
11.58	1.507	0.028	0.009	0.011
11.60	1.506	0.027	0.008	0.011
11.62	1.506	0.027	0.009	0.011
11.64	1.506	0.027	0.008	0.011
11.66	1.505	0.027	0.009	0.011
11.68	1.505	0.027	0.008	0.011
11.70	1.505	0.026	0.009	0.011
11.72	1.504	0.026	0.009	0.011
11.74	1.504	0.026	0.009	0.011
11.76	1.504	0.026	0.008	0.011
11.78	1.503	0.025	0.009	0.011
11.80	1.503	0.025	0.008	0.011
11.82	1.502	0.025	0.009	0.011
11.84	1.501	0.025	0.008	0.011
11.86	1.501	0.024	0.008	0.011
11.88	1.500	0.025	0.008	0.011
11.90	1.500	0.025	0.009	0.011
11.92	1.499	0.025	0.009	0.011
11.94	1.499	0.025	0.009	0.011
11.96	1.499	0.025	0.009	0.011
11.98	1.498	0.025	0.009	0.011
12.00	1.498	0.025	0.009	0.011
12.02	1.497	0.026	0.009	0.011
12.04	1.497	0.026	0.009	0.011
12.06	1.496	0.026	0.009	0.012
12.08	1.497	0.026	0.008	0.012
12.10	1.496	0.026	0.008	0.012
12.12	1.495	0.026	0.008	0.012
12.14	1.496	0.026	0.008	0.012
12.16	1.495	0.026	0.008	0.012
12.18	1.495	0.026	0.008	0.012
12.20	1.495	0.026	0.008	0.012
12.22	1.494	0.026	0.008	0.012
12.24	1.494	0.027	0.008	0.012
12.26	1.494	0.027	0.008	0.012
12.28	1.493	0.027	0.008	0.012
12.30	1.494	0.028	0.009	0.012
12.32	1.493	0.028	0.008	0.012
12.34	1.493	0.029	0.008	0.012
12.36	1.493	0.029	0.008	0.012
12.38	1.493	0.029	0.008	0.013
12.40	1.493	0.030	0.008	0.012
12.42	1.493	0.030	0.008	0.012
12.44	1.493	0.030	0.008	0.012
12.46	1.494	0.030	0.008	0.012
12.48	1.494	0.030	0.007	0.012
12.50	1.494	0.030	0.008	0.012
12.52	1.494	0.030	0.007	0.012
12.54	1.494	0.030	0.008	0.012
12.56	1.494	0.030	0.007	0.012
12.58	1.494	0.030	0.008	0.012
12.60	1.494	0.030	0.007	0.012
12.62	1.494	0.030	0.008	0.013
12.64	1.494	0.030	0.007	0.013
12.66	1.494	0.030	0.008	0.013
12.68	1.494	0.030	0.007	0.013
12.70	1.494	0.030	0.007	0.013
12.72	1.494	0.030	0.007	0.013
12.74	1.494	0.030	0.007	0.013
12.76	1.494	0.030	0.007	0.013
12.78	1.495	0.030	0.007	0.013
12.80	1.495	0.030	0.007	0.013
12.82	1.494	0.030	0.007	0.013
12.84	1.495	0.030	0.007	0.013
12.86	1.495	0.030	0.007	0.013
12.88	1.495	0.029	0.006	0.013
12.90	1.495	0.029	0.007	0.013
12.92	1.495	0.029	0.006	0.013
12.94	1.495	0.029	0.006	0.013
12.96	1.496	0.028	0.006	0.013
12.98	1.495	0.028	0.006	0.013
13.00	1.495	0.028	0.006	0.013
13.02	1.495	0.028	0.006	0.013
13.04	1.495	0.027	0.006	0.013
13.06	1.494	0.027	0.006	0.013
13.08	1.494	0.027	0.006	0.013
13.10	1.494	0.027	0.006	0.013
13.12	1.494	0.027	0.006	0.013
13.14	1.494	0.027	0.006	0.013
13.16	1.494	0.027	0.006	0.013
13.18	1.494	0.027	0.006	0.013
13.20	1.494	0.027	0.005	0.013
13.22	1.494	0.027	0.005	0.013
13.24	1.494	0.027	0.005	0.013
13.26	1.494	0.027	0.005	0.013
13.28	1.494	0.027	0.005	0.013
13.30	1.494	0.027	0.005	0.013
13.32	1.494	0.027	0.005	0.013
13.34	1.494	0.027	0.005	0.013
13.36	1.494	0.026	0.004	0.013
13.38	1.493	0.026	0.004	0.012
13.40	1.493	0.026	0.005	0.012
13.42	1.493	0.026	0.004	0.012
13.44	1.493	0.026	0.004	0.012
13.46	1.493	0.026	0.005	0.012
13.48	1.493	0.026	0.005	0.012
13.50	1.493	0.026	0.005	0.012
13.52	1.493	0.026	0.005	0.012
13.54	1.493	0.026	0.005	0.012
13.56	1.493	0.026	0.004	0.012
13.58	1.493	0.026	0.004	0.012
13.60	1.493	0.026	0.004	0.012
13.62	1.492	0.026	0.004	0.012
13.64	1.492	0.026	0.004	0.012
13.66	1.493	0.026	0.005	0.012
13.68	1.493	0.026	0.005	0.012
13.70	1.493	0.026	0.005	0.012
13.72	1.493	0.026	0.005	0.012
13.74	1.493	0.025	0.004	0.012
13.76	1.493	0.025	0.004	0.012
13.78	1.493	0.025	0.004	0.012
13.80	1.493	0.025	0.004	0.012
13.82	1.492	0.025	0.004	0.012
13.84	1.492	0.025	0.004	0.012
13.86	1.492	0.025	0.004	0.012
13.88	1.493	0.025	0.004	0.012
13.90	1.493	0.025	0.004	0.012
13.92	1.492	0.025	0.004	0.012
13.94	1.492	0.024	0.004	0.012
13.96	1.492	0.025	0.004	0.012
13.98	1.492	0.025	0.004	0.012
14.00	1.492	0.025	0.004	0.012
14.02	1.492	0.025	0.004	0.012
14.04	1.492	0.025	0.004	0.012
14.06	1.492	0.025	0.004	0.012
14.08	1.493	0.025	0.004	0.012
14.10	1.492	0.025	0.003	0.012
14.12	1.492	0.025	0.004	0.012
14.14	1.493	0.025	0.003	0.012
14.16	1.493	0.025	0.004	0.012
14.18	1.493	0.025	0.003	0.012
14.20	1.494	0.025	0.004	0.012
14.22	1.494	0.025	0.003	0.012
14.24	1.494	0.025	0.003	0.012
14.26	1.494	0.025	0.002	0.012
14.28	1.494	0.024	0.003	0.012
14.30	1.494	0.024	0.002	0.012
14.32	1.495	0.024	0.002	0.012
14.34	1.496	0.023	0.002	0.012
14.36	1.495	0.023	0.002	0.012
14.38	1.495	0.023	0.001	0.011
14.40	1.496	0.022	0.002	0.011
14.42	1.496	0.021	0.001	0.011
14.44	1.495	0.020	0.002	0.011
14.46	1.495	0.020	0.002	0.010
14.48	1.495	0.020	0.002	0.010
14.50	1.495	0.019	0.002	0.010
14.52	1.494	0.019	0.002	0.010
14.54	1.494	0.019	0.002	0.010
14.56	1.495	0.018	0.003	0.010
14.58	1.494	0.017	0.002	0.010
14.60	1.493	0.017	0.003	0.010
14.62	1.493	0.017	0.002	0.010
14.64	1.493	0.017	0.004	0.010
14.66	1.492	0.017	0.002	0.010
14.68	1.492	0.017	0.004	0.010
14.70	1.492	0.017	0.002	0.010
14.72	1.492	0.017	0.004	0.010
14.74	1.492	0.017	0.002	0.010
14.76	1.492	0.017	0.005	0.010
14.78	1.492	0.017	0.002	0.010
14.80	1.493	0.016	0.005	0.010
14.82	1.492	0.015	0.003	0.009
14.84	1.492	0.014	0.007	0.009
14.86	1.491	0.014	0.003	0.009
14.88	1.491	0.013	0.009	0.009
14.90	1.489	0.012	0.004	0.009
14.92	1.488	0.013	0.013	0.010
14.94	1.487	0.013	0.005	0.010
14.96	1.487	0.014	0.020	0.011
14.98	1.486	0.014	0.008	0.011
15.00	1.486	0.017	0.054	0.012
