# Supplementary material for: Global scale variability of the mineral dust longwave refractive index: a new dataset of in situ measurements for climate modelling and remote sensing
Source: Copernicus journal article supplement (doi:10.5194/acp-2016-616), 2016-10-19
Supplement: Supplementary file 1 [file acp-2016-616-supplement.zip › Supplementary_DiBiagio_ACPD/CRI_results_Kuwait.txt]

wavelength(microns)	real_part(n)	imaginary_part(k)	standard_deviation(n)	standard_deviation(k)
3.00	1.470	0.004	0.014	0.002
3.02	1.455	0.004	0.015	0.002
3.04	1.455	0.004	0.016	0.002
3.06	1.450	0.004	0.018	0.002
3.08	1.450	0.004	0.019	0.002
3.10	1.447	0.004	0.021	0.002
3.12	1.447	0.004	0.023	0.002
3.14	1.444	0.004	0.026	0.002
3.16	1.444	0.004	0.032	0.002
3.18	1.442	0.004	0.038	0.002
3.20	1.442	0.004	0.036	0.002
3.22	1.441	0.004	0.034	0.002
3.24	1.441	0.004	0.031	0.004
3.26	1.439	0.004	0.028	0.002
3.28	1.439	0.004	0.026	0.002
3.30	1.438	0.004	0.024	0.001
3.32	1.438	0.004	0.022	0.002
3.34	1.436	0.004	0.020	0.002
3.36	1.436	0.004	0.019	0.002
3.38	1.435	0.004	0.018	0.002
3.40	1.435	0.004	0.016	0.002
3.42	1.434	0.004	0.015	0.002
3.44	1.434	0.004	0.015	0.002
3.46	1.433	0.004	0.014	0.002
3.48	1.433	0.004	0.013	0.002
3.50	1.432	0.004	0.013	0.002
3.52	1.432	0.004	0.012	0.002
3.54	1.431	0.004	0.011	0.002
3.56	1.431	0.004	0.011	0.002
3.58	1.430	0.004	0.011	0.002
3.60	1.430	0.004	0.010	0.002
3.62	1.429	0.004	0.010	0.002
3.64	1.429	0.004	0.009	0.003
3.66	1.428	0.004	0.009	0.002
3.68	1.428	0.004	0.008	0.002
3.70	1.427	0.004	0.008	0.002
3.72	1.427	0.004	0.008	0.002
3.74	1.427	0.004	0.008	0.002
3.76	1.426	0.004	0.007	0.002
3.78	1.426	0.004	0.007	0.002
3.80	1.426	0.004	0.006	0.002
3.82	1.425	0.004	0.006	0.002
3.84	1.425	0.004	0.006	0.002
3.86	1.424	0.004	0.006	0.002
3.88	1.424	0.004	0.006	0.002
3.90	1.423	0.004	0.005	0.002
3.92	1.423	0.004	0.005	0.002
3.94	1.423	0.004	0.005	0.002
3.96	1.422	0.004	0.005	0.002
3.98	1.422	0.004	0.005	0.002
4.00	1.422	0.004	0.005	0.002
4.02	1.421	0.004	0.004	0.002
4.04	1.421	0.004	0.004	0.002
4.06	1.420	0.004	0.004	0.002
4.08	1.420	0.004	0.004	0.002
4.10	1.419	0.004	0.004	0.002
4.12	1.419	0.004	0.005	0.002
4.14	1.419	0.004	0.004	0.003
4.16	1.419	0.004	0.004	0.003
4.18	1.418	0.004	0.004	0.004
4.20	1.418	0.004	0.003	0.004
4.22	1.417	0.004	0.003	0.004
4.24	1.417	0.004	0.002	0.004
4.26	1.417	0.004	0.002	0.004
4.28	1.416	0.004	0.001	0.004
4.30	1.416	0.004	0.001	0.004
4.32	1.416	0.004	0.001	0.004
4.34	1.415	0.004	0.001	0.004
4.36	1.415	0.004	0.001	0.003
4.38	1.414	0.004	0.001	0.003
4.40	1.414	0.004	0.002	0.002
4.42	1.414	0.004	0.001	0.002
4.44	1.413	0.004	0.001	0.002
4.46	1.413	0.004	0.001	0.002
4.48	1.413	0.004	0.000	0.002
4.50	1.412	0.004	0.001	0.002
4.52	1.412	0.004	0.001	0.002
4.54	1.411	0.004	0.001	0.002
4.56	1.411	0.004	0.001	0.002
4.58	1.411	0.004	0.001	0.002
4.60	1.411	0.004	0.001	0.002
4.62	1.410	0.004	0.001	0.002
4.64	1.410	0.004	0.001	0.002
4.66	1.409	0.004	0.002	0.002
4.68	1.409	0.004	0.002	0.002
4.70	1.409	0.004	0.002	0.002
4.72	1.408	0.004	0.002	0.002
4.74	1.408	0.004	0.002	0.002
4.76	1.408	0.004	0.002	0.002
4.78	1.407	0.004	0.002	0.002
4.80	1.407	0.004	0.002	0.002
4.82	1.406	0.004	0.002	0.002
4.84	1.406	0.004	0.003	0.002
4.86	1.406	0.004	0.003	0.002
4.88	1.405	0.004	0.003	0.002
4.90	1.405	0.004	0.003	0.002
4.92	1.405	0.004	0.003	0.002
4.94	1.404	0.004	0.003	0.002
4.96	1.404	0.004	0.003	0.002
4.98	1.403	0.004	0.004	0.001
5.00	1.403	0.004	0.004	0.001
5.02	1.402	0.004	0.004	0.001
5.04	1.402	0.004	0.004	0.001
5.06	1.402	0.004	0.004	0.001
5.08	1.401	0.004	0.004	0.001
5.10	1.401	0.004	0.004	0.001
5.12	1.400	0.004	0.004	0.001
5.14	1.400	0.004	0.004	0.001
5.16	1.400	0.004	0.004	0.001
5.18	1.399	0.004	0.005	0.001
5.20	1.399	0.004	0.005	0.001
5.22	1.398	0.004	0.005	0.001
5.24	1.398	0.004	0.005	0.001
5.26	1.397	0.004	0.005	0.001
5.28	1.397	0.004	0.005	0.001
5.30	1.396	0.004	0.005	0.001
5.32	1.396	0.004	0.005	0.001
5.34	1.395	0.004	0.006	0.001
5.36	1.395	0.004	0.005	0.001
5.38	1.394	0.004	0.006	0.001
5.40	1.394	0.004	0.006	0.001
5.42	1.393	0.004	0.006	0.001
5.44	1.393	0.004	0.006	0.001
5.46	1.392	0.004	0.006	0.001
5.48	1.392	0.004	0.006	0.001
5.50	1.391	0.004	0.006	0.001
5.52	1.391	0.004	0.007	0.001
5.54	1.390	0.004	0.007	0.001
5.56	1.390	0.004	0.007	0.001
5.58	1.389	0.004	0.007	0.001
5.60	1.388	0.004	0.007	0.001
5.62	1.388	0.004	0.008	0.001
5.64	1.387	0.004	0.008	0.001
5.66	1.386	0.004	0.008	0.001
5.68	1.385	0.004	0.008	0.001
5.70	1.385	0.004	0.008	0.001
5.72	1.384	0.004	0.008	0.001
5.74	1.383	0.004	0.009	0.001
5.76	1.381	0.004	0.009	0.001
5.78	1.380	0.005	0.009	0.001
5.80	1.380	0.006	0.009	0.002
5.82	1.379	0.006	0.009	0.002
5.84	1.378	0.007	0.009	0.002
5.86	1.377	0.007	0.010	0.002
5.88	1.377	0.008	0.010	0.003
5.90	1.376	0.008	0.010	0.003
5.92	1.375	0.009	0.010	0.004
5.94	1.375	0.009	0.010	0.004
5.96	1.374	0.010	0.010	0.005
5.98	1.374	0.010	0.009	0.005
6.00	1.372	0.011	0.009	0.005
6.02	1.373	0.011	0.009	0.006
6.04	1.371	0.011	0.008	0.006
6.06	1.370	0.012	0.008	0.006
6.08	1.368	0.012	0.007	0.006
6.10	1.366	0.014	0.007	0.006
6.12	1.366	0.016	0.007	0.006
6.14	1.365	0.018	0.006	0.006
6.16	1.365	0.020	0.006	0.006
6.18	1.366	0.022	0.006	0.005
6.20	1.368	0.023	0.006	0.005
6.22	1.370	0.022	0.006	0.005
6.24	1.369	0.021	0.006	0.005
6.26	1.368	0.020	0.007	0.005
6.28	1.365	0.021	0.007	0.005
6.30	1.365	0.022	0.008	0.005
6.32	1.363	0.023	0.007	0.006
6.34	1.364	0.024	0.007	0.006
6.36	1.360	0.025	0.007	0.006
6.38	1.361	0.028	0.007	0.007
6.40	1.358	0.029	0.006	0.007
6.42	1.361	0.037	0.006	0.007
6.44	1.365	0.033	0.006	0.008
6.46	1.362	0.035	0.005	0.008
6.48	1.364	0.037	0.005	0.008
6.50	1.364	0.037	0.004	0.008
6.52	1.365	0.038	0.003	0.008
6.54	1.364	0.038	0.003	0.007
6.56	1.362	0.041	0.003	0.007
6.58	1.366	0.046	0.002	0.006
6.60	1.368	0.045	0.003	0.006
6.62	1.369	0.048	0.002	0.005
6.64	1.375	0.047	0.003	0.005
6.66	1.374	0.043	0.003	0.005
6.68	1.372	0.045	0.002	0.005
6.70	1.375	0.047	0.002	0.005
6.72	1.377	0.046	0.002	0.005
6.74	1.377	0.046	0.002	0.004
6.76	1.377	0.047	0.003	0.004
6.78	1.380	0.048	0.003	0.004
6.80	1.381	0.047	0.003	0.004
6.82	1.383	0.047	0.002	0.004
6.84	1.384	0.045	0.003	0.003
6.86	1.384	0.046	0.003	0.004
6.88	1.387	0.045	0.003	0.004
6.90	1.388	0.043	0.003	0.004
6.92	1.387	0.042	0.003	0.003
6.94	1.388	0.043	0.003	0.003
6.96	1.391	0.041	0.003	0.004
6.98	1.390	0.038	0.002	0.003
7.00	1.390	0.038	0.002	0.003
7.02	1.391	0.036	0.003	0.003
7.04	1.389	0.035	0.003	0.002
7.06	1.390	0.036	0.003	0.003
7.08	1.391	0.034	0.003	0.003
7.10	1.391	0.033	0.003	0.003
7.12	1.391	0.031	0.003	0.002
7.14	1.390	0.031	0.003	0.002
7.16	1.392	0.029	0.003	0.002
7.18	1.390	0.027	0.003	0.002
7.20	1.389	0.026	0.003	0.002
7.22	1.389	0.026	0.003	0.001
7.24	1.389	0.024	0.004	0.002
7.26	1.388	0.023	0.004	0.001
7.28	1.387	0.021	0.004	0.002
7.30	1.385	0.021	0.004	0.001
7.32	1.386	0.020	0.004	0.001
7.34	1.384	0.018	0.004	0.002
7.36	1.382	0.018	0.004	0.001
7.38	1.382	0.017	0.004	0.001
7.40	1.380	0.016	0.005	0.001
7.42	1.379	0.016	0.005	0.001
7.44	1.378	0.015	0.005	0.001
7.46	1.376	0.014	0.005	0.002
7.48	1.374	0.013	0.004	0.002
7.50	1.372	0.014	0.004	0.001
7.52	1.371	0.013	0.005	0.001
7.54	1.369	0.013	0.005	0.001
7.56	1.364	0.013	0.005	0.001
7.58	1.363	0.020	0.005	0.002
7.60	1.367	0.019	0.005	0.002
7.62	1.366	0.019	0.005	0.002
7.64	1.368	0.017	0.005	0.002
7.66	1.365	0.016	0.005	0.001
7.68	1.365	0.015	0.006	0.001
7.70	1.362	0.015	0.006	0.002
7.72	1.362	0.015	0.006	0.002
7.74	1.361	0.015	0.006	0.002
7.76	1.360	0.014	0.006	0.002
7.78	1.358	0.014	0.006	0.002
7.80	1.358	0.013	0.006	0.002
7.82	1.355	0.013	0.006	0.002
7.84	1.354	0.013	0.006	0.002
7.86	1.351	0.014	0.006	0.002
7.88	1.352	0.014	0.006	0.002
7.90	1.349	0.013	0.006	0.002
7.92	1.348	0.014	0.006	0.002
7.94	1.346	0.013	0.006	0.002
7.96	1.344	0.014	0.006	0.002
7.98	1.343	0.014	0.006	0.002
8.00	1.341	0.014	0.006	0.002
8.02	1.339	0.014	0.006	0.002
8.04	1.337	0.015	0.006	0.002
8.06	1.336	0.015	0.006	0.002
8.08	1.334	0.015	0.006	0.002
8.10	1.331	0.015	0.006	0.002
8.12	1.330	0.016	0.006	0.002
8.14	1.327	0.016	0.006	0.002
8.16	1.325	0.017	0.006	0.002
8.18	1.322	0.018	0.006	0.002
8.20	1.320	0.019	0.006	0.002
8.22	1.317	0.020	0.006	0.002
8.24	1.316	0.022	0.006	0.002
8.26	1.313	0.023	0.006	0.002
8.28	1.312	0.025	0.006	0.002
8.30	1.309	0.026	0.006	0.002
8.32	1.308	0.028	0.007	0.002
8.34	1.306	0.029	0.007	0.002
8.36	1.303	0.031	0.007	0.002
8.38	1.301	0.033	0.007	0.002
8.40	1.299	0.035	0.007	0.002
8.42	1.297	0.037	0.007	0.002
8.44	1.295	0.040	0.007	0.001
8.46	1.294	0.042	0.007	0.001
8.48	1.292	0.044	0.007	0.001
8.50	1.290	0.046	0.007	0.001
8.52	1.288	0.049	0.007	0.001
8.54	1.288	0.052	0.007	0.001
8.56	1.287	0.054	0.007	0.001
8.58	1.286	0.056	0.007	0.001
8.60	1.285	0.057	0.007	0.001
8.62	1.282	0.059	0.007	0.001
8.64	1.281	0.061	0.007	0.001
8.66	1.278	0.063	0.008	0.001
8.68	1.276	0.067	0.008	0.001
8.70	1.274	0.070	0.008	0.001
8.72	1.273	0.073	0.008	0.001
8.74	1.271	0.076	0.008	0.001
8.76	1.270	0.080	0.008	0.001
8.78	1.268	0.083	0.008	0.001
8.80	1.267	0.086	0.008	0.001
8.82	1.264	0.089	0.008	0.001
8.84	1.262	0.094	0.008	0.001
8.86	1.260	0.098	0.008	0.001
8.88	1.258	0.104	0.009	0.001
8.90	1.256	0.111	0.009	0.001
8.92	1.256	0.120	0.009	0.002
8.94	1.260	0.128	0.009	0.003
8.96	1.266	0.134	0.009	0.003
8.98	1.273	0.136	0.008	0.003
9.00	1.275	0.135	0.008	0.003
9.02	1.277	0.136	0.008	0.002
9.04	1.278	0.136	0.008	0.002
9.06	1.278	0.137	0.008	0.001
9.08	1.278	0.137	0.009	0.001
9.10	1.277	0.139	0.010	0.001
9.12	1.276	0.140	0.010	0.001
9.14	1.273	0.141	0.010	0.002
9.16	1.271	0.144	0.010	0.003
9.18	1.268	0.147	0.010	0.003
9.20	1.264	0.151	0.010	0.004
9.22	1.261	0.157	0.010	0.004
9.24	1.259	0.163	0.010	0.004
9.26	1.256	0.169	0.009	0.004
9.28	1.253	0.177	0.009	0.004
9.30	1.252	0.186	0.009	0.005
9.32	1.251	0.195	0.009	0.005
9.34	1.251	0.205	0.009	0.005
9.36	1.252	0.216	0.009	0.005
9.38	1.254	0.227	0.009	0.005
9.40	1.257	0.239	0.008	0.006
9.42	1.262	0.251	0.008	0.006
9.44	1.269	0.262	0.008	0.006
9.46	1.277	0.273	0.008	0.006
9.48	1.287	0.283	0.008	0.007
9.50	1.296	0.292	0.008	0.006
9.52	1.307	0.302	0.008	0.006
9.54	1.320	0.309	0.007	0.007
9.56	1.333	0.316	0.007	0.007
9.58	1.348	0.321	0.007	0.008
9.60	1.363	0.324	0.007	0.008
9.62	1.379	0.325	0.008	0.008
9.64	1.393	0.324	0.008	0.009
9.66	1.407	0.322	0.008	0.008
9.68	1.421	0.319	0.008	0.009
9.70	1.434	0.314	0.009	0.008
9.72	1.445	0.308	0.009	0.008
9.74	1.455	0.302	0.009	0.008
9.76	1.464	0.295	0.009	0.008
9.78	1.472	0.288	0.010	0.008
9.80	1.478	0.281	0.010	0.008
9.82	1.484	0.274	0.010	0.008
9.84	1.488	0.267	0.011	0.008
9.86	1.491	0.262	0.012	0.007
9.88	1.495	0.258	0.013	0.006
9.90	1.499	0.256	0.013	0.005
9.92	1.506	0.254	0.013	0.004
9.94	1.514	0.249	0.012	0.003
9.96	1.521	0.242	0.012	0.003
9.98	1.527	0.234	0.012	0.003
10.00	1.530	0.226	0.012	0.004
10.02	1.534	0.220	0.012	0.004
10.04	1.538	0.212	0.012	0.004
10.06	1.540	0.205	0.012	0.004
10.08	1.543	0.198	0.013	0.003
10.10	1.545	0.190	0.013	0.003
10.12	1.546	0.183	0.013	0.003
10.14	1.546	0.176	0.014	0.003
10.16	1.547	0.169	0.014	0.002
10.18	1.547	0.162	0.014	0.002
10.20	1.545	0.155	0.014	0.001
10.22	1.544	0.150	0.014	0.001
10.24	1.543	0.144	0.014	0.001
10.26	1.541	0.138	0.014	0.001
10.28	1.539	0.134	0.014	0.001
10.30	1.537	0.129	0.014	0.001
10.32	1.535	0.125	0.014	0.001
10.34	1.533	0.120	0.014	0.001
10.36	1.530	0.116	0.014	0.001
10.38	1.527	0.113	0.014	0.001
10.40	1.524	0.111	0.014	0.001
10.42	1.523	0.108	0.014	0.001
10.44	1.521	0.105	0.014	0.001
10.46	1.518	0.101	0.014	0.001
10.48	1.513	0.099	0.014	0.001
10.50	1.511	0.098	0.015	0.001
10.52	1.507	0.096	0.015	0.001
10.54	1.503	0.096	0.015	0.001
10.56	1.501	0.097	0.015	0.001
10.58	1.499	0.097	0.016	0.001
10.60	1.498	0.099	0.016	0.001
10.62	1.498	0.098	0.016	0.002
10.64	1.497	0.098	0.016	0.002
10.66	1.496	0.098	0.016	0.003
10.68	1.496	0.098	0.016	0.003
10.70	1.496	0.097	0.015	0.003
10.72	1.495	0.096	0.015	0.002
10.74	1.494	0.095	0.016	0.002
10.76	1.492	0.095	0.016	0.003
10.78	1.491	0.096	0.016	0.003
10.80	1.490	0.097	0.016	0.004
10.82	1.491	0.098	0.016	0.004
10.84	1.492	0.098	0.015	0.004
10.86	1.493	0.097	0.015	0.004
10.88	1.492	0.097	0.016	0.004
10.90	1.494	0.097	0.016	0.004
10.92	1.493	0.096	0.016	0.004
10.94	1.494	0.097	0.016	0.004
10.96	1.495	0.096	0.016	0.004
10.98	1.496	0.096	0.016	0.005
11.00	1.497	0.095	0.016	0.005
11.02	1.499	0.095	0.015	0.005
11.04	1.501	0.093	0.015	0.005
11.06	1.503	0.091	0.014	0.005
11.08	1.504	0.087	0.014	0.004
11.10	1.503	0.084	0.014	0.004
11.12	1.503	0.082	0.015	0.003
11.14	1.502	0.079	0.016	0.003
11.16	1.501	0.077	0.016	0.003
11.18	1.499	0.075	0.017	0.003
11.20	1.498	0.074	0.017	0.003
11.22	1.497	0.072	0.017	0.003
11.24	1.494	0.071	0.018	0.003
11.26	1.492	0.071	0.018	0.003
11.28	1.491	0.071	0.018	0.004
11.30	1.490	0.071	0.018	0.004
11.32	1.488	0.071	0.018	0.004
11.34	1.487	0.072	0.018	0.005
11.36	1.485	0.073	0.018	0.005
11.38	1.485	0.075	0.017	0.005
11.40	1.485	0.076	0.017	0.004
11.42	1.486	0.079	0.017	0.004
11.44	1.488	0.081	0.018	0.004
11.46	1.492	0.082	0.018	0.004
11.48	1.496	0.081	0.019	0.004
11.50	1.499	0.078	0.020	0.004
11.52	1.500	0.074	0.020	0.005
11.54	1.500	0.072	0.021	0.006
11.56	1.500	0.070	0.020	0.006
11.58	1.500	0.069	0.020	0.006
11.60	1.500	0.067	0.021	0.007
11.62	1.500	0.066	0.020	0.007
11.64	1.500	0.065	0.020	0.008
11.66	1.500	0.064	0.020	0.008
11.68	1.501	0.063	0.020	0.009
11.70	1.501	0.062	0.020	0.009
11.72	1.502	0.061	0.019	0.009
11.74	1.504	0.060	0.019	0.009
11.76	1.505	0.059	0.019	0.009
11.78	1.513	0.058	0.019	0.009
11.80	1.517	0.044	0.019	0.009
11.82	1.508	0.035	0.019	0.009
11.84	1.502	0.033	0.019	0.010
11.86	1.497	0.033	0.019	0.009
11.88	1.495	0.033	0.019	0.010
11.90	1.492	0.031	0.019	0.008
11.92	1.489	0.031	0.019	0.010
11.94	1.488	0.031	0.019	0.010
11.96	1.485	0.030	0.019	0.009
11.98	1.483	0.031	0.019	0.010
12.00	1.483	0.030	0.019	0.008
12.02	1.480	0.029	0.019	0.010
12.04	1.478	0.030	0.018	0.009
12.06	1.477	0.029	0.019	0.009
12.08	1.474	0.030	0.018	0.010
12.10	1.474	0.031	0.018	0.010
12.12	1.472	0.030	0.018	0.009
12.14	1.471	0.031	0.018	0.010
12.16	1.470	0.030	0.017	0.010
12.18	1.467	0.031	0.017	0.010
12.20	1.467	0.032	0.017	0.010
12.22	1.466	0.033	0.017	0.010
12.24	1.466	0.032	0.017	0.010
12.26	1.463	0.033	0.017	0.010
12.28	1.464	0.034	0.016	0.008
12.30	1.463	0.033	0.016	0.010
12.32	1.462	0.034	0.016	0.008
12.34	1.460	0.034	0.016	0.010
12.36	1.460	0.036	0.016	0.010
12.38	1.459	0.036	0.016	0.010
12.40	1.459	0.038	0.016	0.009
12.42	1.458	0.038	0.015	0.010
12.44	1.458	0.040	0.015	0.008
12.46	1.458	0.040	0.015	0.010
12.48	1.458	0.042	0.015	0.009
12.50	1.460	0.042	0.015	0.010
12.52	1.459	0.042	0.015	0.010
12.54	1.460	0.044	0.015	0.009
12.56	1.462	0.044	0.015	0.010
12.58	1.463	0.042	0.015	0.010
12.60	1.462	0.042	0.015	0.010
12.62	1.464	0.042	0.015	0.010
12.64	1.464	0.040	0.015	0.010
12.66	1.462	0.040	0.016	0.010
12.68	1.462	0.040	0.016	0.010
12.70	1.462	0.040	0.016	0.008
12.72	1.462	0.040	0.016	0.010
12.74	1.462	0.040	0.016	0.008
12.76	1.464	0.040	0.016	0.010
12.78	1.463	0.038	0.016	0.008
12.80	1.462	0.038	0.016	0.010
12.82	1.462	0.038	0.016	0.009
12.84	1.462	0.038	0.016	0.010
12.86	1.462	0.038	0.016	0.010
12.88	1.462	0.038	0.015	0.009
12.90	1.462	0.038	0.015	0.010
12.92	1.463	0.038	0.015	0.009
12.94	1.463	0.036	0.015	0.010
12.96	1.462	0.036	0.014	0.010
12.98	1.462	0.036	0.014	0.008
13.00	1.463	0.036	0.014	0.008
13.02	1.463	0.034	0.014	0.009
13.04	1.461	0.034	0.014	0.010
13.06	1.462	0.034	0.014	0.010
13.08	1.462	0.032	0.014	0.009
13.10	1.460	0.032	0.013	0.010
13.12	1.460	0.032	0.013	0.010
13.14	1.459	0.032	0.013	0.009
13.16	1.459	0.032	0.014	0.010
13.18	1.459	0.032	0.014	0.008
13.20	1.460	0.032	0.014	0.010
13.22	1.460	0.030	0.013	0.008
13.24	1.458	0.030	0.013	0.009
13.26	1.458	0.030	0.013	0.010
13.28	1.457	0.030	0.013	0.010
13.30	1.457	0.030	0.013	0.008
13.32	1.456	0.030	0.013	0.009
13.34	1.456	0.030	0.013	0.010
13.36	1.456	0.030	0.013	0.009
13.38	1.456	0.030	0.013	0.010
13.40	1.457	0.030	0.013	0.010
13.42	1.457	0.028	0.013	0.008
13.44	1.455	0.028	0.013	0.008
13.46	1.455	0.028	0.013	0.010
13.48	1.454	0.028	0.013	0.010
13.50	1.454	0.028	0.013	0.010
13.52	1.453	0.028	0.014	0.009
13.54	1.454	0.028	0.014	0.010
13.56	1.453	0.028	0.014	0.008
13.58	1.453	0.028	0.015	0.008
13.60	1.453	0.028	0.015	0.010
13.62	1.454	0.028	0.014	0.009
13.64	1.453	0.026	0.014	0.010
13.66	1.452	0.026	0.013	0.008
13.68	1.452	0.026	0.013	0.009
13.70	1.451	0.026	0.013	0.010
13.72	1.451	0.026	0.012	0.010
13.74	1.450	0.026	0.012	0.010
13.76	1.450	0.026	0.011	0.009
13.78	1.450	0.026	0.010	0.010
13.80	1.449	0.026	0.010	0.009
13.82	1.449	0.026	0.009	0.008
13.84	1.449	0.026	0.010	0.010
13.86	1.449	0.026	0.009	0.010
13.88	1.448	0.026	0.009	0.008
13.90	1.448	0.026	0.009	0.010
13.92	1.448	0.026	0.009	0.008
13.94	1.448	0.026	0.009	0.010
13.96	1.447	0.026	0.009	0.010
13.98	1.447	0.026	0.009	0.010
14.00	1.447	0.026	0.009	0.008
14.02	1.447	0.026	0.008	0.010
14.04	1.447	0.026	0.008	0.010
14.06	1.447	0.026	0.008	0.008
14.08	1.446	0.026	0.008	0.009
14.10	1.446	0.026	0.009	0.010
14.12	1.446	0.026	0.008	0.008
14.14	1.446	0.026	0.008	0.010
14.16	1.446	0.026	0.009	0.009
14.18	1.446	0.026	0.008	0.010
14.20	1.445	0.026	0.008	0.010
14.22	1.445	0.026	0.008	0.010
14.24	1.445	0.026	0.008	0.010
14.26	1.445	0.026	0.008	0.008
14.28	1.445	0.026	0.007	0.008
14.30	1.445	0.026	0.006	0.010
14.32	1.445	0.026	0.006	0.009
14.34	1.445	0.026	0.006	0.010
14.36	1.445	0.026	0.005	0.010
14.38	1.445	0.026	0.005	0.010
14.40	1.445	0.026	0.005	0.010
14.42	1.445	0.026	0.004	0.010
14.44	1.445	0.026	0.004	0.009
14.46	1.445	0.026	0.004	0.010
14.48	1.445	0.026	0.004	0.010
14.50	1.444	0.026	0.004	0.008
14.52	1.445	0.026	0.004	0.010
14.54	1.445	0.026	0.004	0.010
14.56	1.445	0.026	0.004	0.009
14.58	1.445	0.026	0.004	0.010
14.60	1.445	0.026	0.004	0.010
14.62	1.445	0.026	0.004	0.010
14.64	1.445	0.026	0.004	0.009
14.66	1.445	0.026	0.004	0.010
14.68	1.445	0.026	0.004	0.010
14.70	1.445	0.026	0.005	0.010
14.72	1.446	0.026	0.005	0.010
14.74	1.446	0.026	0.005	0.010
14.76	1.446	0.026	0.006	0.010
14.78	1.446	0.026	0.006	0.010
14.80	1.447	0.026	0.007	0.010
14.82	1.447	0.026	0.007	0.010
14.84	1.448	0.026	0.008	0.009
14.86	1.448	0.026	0.008	0.010
14.88	1.450	0.026	0.009	0.010
14.90	1.450	0.026	0.010	0.010
14.92	1.452	0.026	0.010	0.010
14.94	1.452	0.026	0.011	0.009
14.96	1.456	0.026	0.012	0.009
14.98	1.456	0.026	0.012	0.010
15.00	1.470	0.026	0.013	0.008
