# Supplementary material for: Global scale variability of the mineral dust longwave refractive index: a new dataset of in situ measurements for climate modelling and remote sensing
Source: Copernicus journal article supplement (doi:10.5194/acp-2016-616), 2016-10-19
Supplement: Supplementary file 1 [file acp-2016-616-supplement.zip › Supplementary_DiBiagio_ACPD/CRI_results_Niger.txt]

wavelength(microns)	real_part(n)	imaginary_part(k)	standard_deviation(n)	standard_deviation(k)
3.00	1.477	0.015	0.095	0.005
3.02	1.461	0.015	0.141	0.005
3.04	1.460	0.015	0.054	0.005
3.06	1.454	0.015	0.061	0.005
3.08	1.454	0.015	0.040	0.005
3.10	1.450	0.015	0.042	0.005
3.12	1.450	0.015	0.027	0.005
3.14	1.447	0.015	0.029	0.005
3.16	1.447	0.015	0.029	0.005
3.18	1.444	0.015	0.027	0.005
3.20	1.444	0.015	0.026	0.005
3.22	1.442	0.015	0.029	0.005
3.24	1.441	0.015	0.024	0.005
3.26	1.440	0.015	0.026	0.005
3.28	1.439	0.015	0.019	0.005
3.30	1.438	0.015	0.023	0.005
3.32	1.437	0.015	0.016	0.005
3.34	1.436	0.015	0.018	0.005
3.36	1.435	0.015	0.011	0.005
3.38	1.434	0.015	0.014	0.005
3.40	1.434	0.015	0.008	0.005
3.42	1.432	0.015	0.010	0.005
3.44	1.432	0.015	0.002	0.005
3.46	1.431	0.015	0.004	0.005
3.48	1.430	0.015	0.003	0.005
3.50	1.429	0.015	0.004	0.005
3.52	1.429	0.015	0.011	0.005
3.54	1.428	0.015	0.010	0.005
3.56	1.427	0.015	0.027	0.005
3.58	1.426	0.015	0.033	0.005
3.60	1.426	0.015	0.037	0.005
3.62	1.425	0.015	0.025	0.007
3.64	1.424	0.015	0.019	0.008
3.66	1.423	0.015	0.012	0.007
3.68	1.423	0.015	0.013	0.008
3.70	1.422	0.015	0.009	0.009
3.72	1.421	0.015	0.009	0.009
3.74	1.420	0.015	0.008	0.008
3.76	1.420	0.015	0.009	0.008
3.78	1.419	0.015	0.006	0.010
3.80	1.419	0.015	0.009	0.008
3.82	1.418	0.015	0.007	0.010
3.84	1.417	0.015	0.011	0.008
3.86	1.416	0.015	0.008	0.008
3.88	1.416	0.015	0.009	0.008
3.90	1.415	0.015	0.009	0.006
3.92	1.415	0.015	0.009	0.008
3.94	1.414	0.015	0.010	0.006
3.96	1.413	0.015	0.009	0.006
3.98	1.413	0.015	0.011	0.006
4.00	1.412	0.015	0.009	0.008
4.02	1.411	0.015	0.015	0.006
4.04	1.411	0.015	0.010	0.006
4.06	1.410	0.015	0.013	0.006
4.08	1.410	0.015	0.012	0.006
4.10	1.409	0.015	0.014	0.006
4.12	1.408	0.015	0.013	0.007
4.14	1.408	0.015	0.020	0.013
4.16	1.407	0.015	0.016	0.010
4.18	1.406	0.015	0.016	0.010
4.20	1.406	0.015	0.014	0.012
4.22	1.405	0.015	0.013	0.014
4.24	1.405	0.015	0.010	0.017
4.26	1.404	0.015	0.011	0.017
4.28	1.404	0.015	0.008	0.018
4.30	1.403	0.015	0.007	0.016
4.32	1.402	0.015	0.002	0.014
4.34	1.402	0.015	0.003	0.012
4.36	1.401	0.015	0.006	0.011
4.38	1.400	0.015	0.004	0.007
4.40	1.400	0.015	0.003	0.007
4.42	1.399	0.015	0.004	0.005
4.44	1.399	0.015	0.003	0.006
4.46	1.398	0.015	0.003	0.004
4.48	1.398	0.015	0.004	0.004
4.50	1.397	0.015	0.005	0.004
4.52	1.396	0.015	0.005	0.004
4.54	1.396	0.015	0.006	0.004
4.56	1.395	0.015	0.006	0.004
4.58	1.394	0.015	0.006	0.004
4.60	1.394	0.015	0.006	0.004
4.62	1.393	0.015	0.006	0.004
4.64	1.393	0.015	0.006	0.004
4.66	1.392	0.015	0.005	0.004
4.68	1.392	0.015	0.006	0.004
4.70	1.391	0.015	0.007	0.004
4.72	1.390	0.015	0.006	0.004
4.74	1.390	0.015	0.008	0.004
4.76	1.389	0.015	0.004	0.004
4.78	1.388	0.015	0.009	0.004
4.80	1.388	0.015	0.007	0.004
4.82	1.387	0.015	0.009	0.004
4.84	1.387	0.015	0.008	0.004
4.86	1.386	0.015	0.010	0.004
4.88	1.385	0.015	0.008	0.004
4.90	1.385	0.015	0.010	0.004
4.92	1.384	0.015	0.009	0.004
4.94	1.383	0.015	0.010	0.004
4.96	1.383	0.015	0.009	0.004
4.98	1.382	0.015	0.009	0.004
5.00	1.382	0.015	0.009	0.004
5.02	1.381	0.015	0.013	0.004
5.04	1.380	0.015	0.012	0.004
5.06	1.380	0.015	0.015	0.004
5.08	1.379	0.015	0.013	0.005
5.10	1.378	0.015	0.015	0.005
5.12	1.378	0.015	0.014	0.006
5.14	1.377	0.015	0.015	0.006
5.16	1.377	0.015	0.014	0.006
5.18	1.376	0.015	0.017	0.006
5.20	1.375	0.015	0.014	0.004
5.22	1.375	0.015	0.013	0.004
5.24	1.374	0.015	0.015	0.004
5.26	1.373	0.015	0.015	0.004
5.28	1.373	0.015	0.015	0.004
5.30	1.372	0.015	0.015	0.004
5.32	1.372	0.015	0.015	0.004
5.34	1.371	0.015	0.015	0.004
5.36	1.370	0.015	0.015	0.004
5.38	1.369	0.015	0.016	0.004
5.40	1.369	0.015	0.015	0.004
5.42	1.368	0.015	0.014	0.001
5.44	1.368	0.015	0.014	0.004
5.46	1.367	0.015	0.017	0.005
5.48	1.366	0.015	0.016	0.005
5.50	1.365	0.015	0.019	0.005
5.52	1.365	0.015	0.018	0.006
5.54	1.364	0.015	0.019	0.006
5.56	1.363	0.015	0.019	0.006
5.58	1.362	0.015	0.021	0.006
5.60	1.362	0.015	0.021	0.008
5.62	1.361	0.015	0.022	0.005
5.64	1.361	0.015	0.021	0.006
5.66	1.360	0.015	0.021	0.006
5.68	1.359	0.015	0.020	0.006
5.70	1.358	0.015	0.020	0.006
5.72	1.358	0.015	0.021	0.007
5.74	1.357	0.015	0.021	0.008
5.76	1.356	0.015	0.021	0.008
5.78	1.355	0.015	0.020	0.006
5.80	1.355	0.015	0.019	0.011
5.82	1.354	0.015	0.022	0.012
5.84	1.353	0.015	0.020	0.012
5.86	1.352	0.015	0.023	0.012
5.88	1.352	0.015	0.022	0.013
5.90	1.351	0.015	0.022	0.014
5.92	1.350	0.015	0.022	0.016
5.94	1.349	0.015	0.022	0.017
5.96	1.349	0.015	0.020	0.017
5.98	1.348	0.015	0.018	0.017
6.00	1.347	0.015	0.018	0.016
6.02	1.346	0.015	0.020	0.017
6.04	1.345	0.015	0.016	0.017
6.06	1.344	0.015	0.016	0.017
6.08	1.344	0.015	0.015	0.016
6.10	1.343	0.015	0.017	0.016
6.12	1.342	0.015	0.015	0.015
6.14	1.341	0.015	0.017	0.013
6.16	1.340	0.015	0.014	0.009
6.18	1.339	0.015	0.014	0.011
6.20	1.339	0.015	0.015	0.011
6.22	1.337	0.015	0.015	0.009
6.24	1.337	0.015	0.018	0.007
6.26	1.336	0.015	0.020	0.009
6.28	1.335	0.015	0.022	0.005
6.30	1.334	0.015	0.024	0.008
6.32	1.333	0.015	0.023	0.009
6.34	1.332	0.015	0.025	0.010
6.36	1.331	0.015	0.024	0.012
6.38	1.330	0.015	0.026	0.014
6.40	1.329	0.015	0.026	0.014
6.42	1.328	0.015	0.024	0.016
6.44	1.327	0.015	0.023	0.018
6.46	1.326	0.015	0.021	0.020
6.48	1.325	0.015	0.019	0.020
6.50	1.324	0.015	0.016	0.022
6.52	1.323	0.015	0.014	0.022
6.54	1.322	0.015	0.015	0.022
6.56	1.321	0.015	0.013	0.022
6.58	1.320	0.015	0.013	0.020
6.60	1.319	0.015	0.014	0.020
6.62	1.318	0.015	0.014	0.018
6.64	1.317	0.015	0.014	0.018
6.66	1.316	0.015	0.014	0.015
6.68	1.315	0.015	0.012	0.015
6.70	1.313	0.015	0.015	0.014
6.72	1.312	0.015	0.014	0.014
6.74	1.311	0.015	0.015	0.010
6.76	1.310	0.015	0.014	0.009
6.78	1.309	0.015	0.015	0.009
6.80	1.308	0.015	0.014	0.009
6.82	1.306	0.015	0.015	0.009
6.84	1.305	0.015	0.015	0.006
6.86	1.304	0.015	0.013	0.006
6.88	1.303	0.015	0.013	0.006
6.90	1.301	0.015	0.014	0.005
6.92	1.300	0.015	0.012	0.005
6.94	1.298	0.015	0.012	0.008
6.96	1.297	0.015	0.013	0.008
6.98	1.295	0.015	0.014	0.005
7.00	1.294	0.015	0.015	0.005
7.02	1.293	0.015	0.016	0.005
7.04	1.292	0.015	0.017	0.005
7.06	1.290	0.015	0.018	0.008
7.08	1.289	0.015	0.017	0.008
7.10	1.287	0.015	0.017	0.008
7.12	1.285	0.015	0.017	0.007
7.14	1.283	0.015	0.017	0.007
7.16	1.282	0.015	0.016	0.007
7.18	1.280	0.015	0.019	0.005
7.20	1.279	0.015	0.019	0.007
7.22	1.277	0.015	0.019	0.007
7.24	1.276	0.015	0.019	0.008
7.26	1.273	0.015	0.018	0.007
7.28	1.272	0.015	0.018	0.005
7.30	1.270	0.015	0.019	0.005
7.32	1.268	0.015	0.019	0.005
7.34	1.266	0.015	0.020	0.005
7.36	1.264	0.015	0.020	0.005
7.38	1.262	0.015	0.021	0.005
7.40	1.260	0.015	0.021	0.005
7.42	1.258	0.015	0.021	0.005
7.44	1.256	0.015	0.021	0.004
7.46	1.253	0.015	0.022	0.001
7.48	1.252	0.015	0.022	0.001
7.50	1.249	0.015	0.023	0.001
7.52	1.247	0.015	0.023	0.001
7.54	1.244	0.015	0.024	0.001
7.56	1.243	0.015	0.023	0.001
7.58	1.239	0.014	0.024	0.001
7.60	1.237	0.014	0.024	0.001
7.62	1.233	0.014	0.025	0.001
7.64	1.231	0.014	0.025	0.001
7.66	1.227	0.014	0.026	0.001
7.68	1.225	0.014	0.026	0.001
7.70	1.220	0.014	0.027	0.001
7.72	1.218	0.014	0.026	0.001
7.74	1.212	0.014	0.028	0.001
7.76	1.211	0.015	0.027	0.001
7.78	1.205	0.015	0.029	0.001
7.80	1.205	0.016	0.028	0.001
7.82	1.196	0.013	0.032	0.004
7.84	1.194	0.018	0.029	0.001
7.86	1.188	0.015	0.031	0.004
7.88	1.184	0.020	0.030	0.001
7.90	1.180	0.017	0.031	0.004
7.92	1.174	0.022	0.031	0.001
7.94	1.171	0.020	0.030	0.004
7.96	1.163	0.023	0.033	0.001
7.98	1.160	0.025	0.033	0.001
8.00	1.156	0.026	0.034	0.001
8.02	1.148	0.025	0.036	0.005
8.04	1.143	0.031	0.035	0.001
8.06	1.137	0.029	0.035	0.005
8.08	1.129	0.036	0.036	0.001
8.10	1.125	0.035	0.035	0.005
8.12	1.116	0.042	0.038	0.001
8.14	1.114	0.042	0.036	0.005
8.16	1.102	0.046	0.042	0.005
8.18	1.097	0.051	0.039	0.005
8.20	1.088	0.058	0.042	0.006
8.22	1.086	0.064	0.038	0.006
8.24	1.078	0.067	0.043	0.007
8.26	1.072	0.073	0.042	0.007
8.28	1.062	0.079	0.044	0.007
8.30	1.056	0.090	0.042	0.010
8.32	1.053	0.098	0.044	0.011
8.34	1.049	0.104	0.046	0.011
8.36	1.042	0.113	0.046	0.012
8.38	1.041	0.121	0.044	0.011
8.40	1.035	0.126	0.044	0.015
8.42	1.029	0.134	0.045	0.016
8.44	1.023	0.146	0.047	0.014
8.46	1.024	0.154	0.047	0.016
8.48	1.017	0.161	0.048	0.017
8.50	1.016	0.173	0.045	0.019
8.52	1.013	0.179	0.046	0.017
8.54	1.010	0.189	0.047	0.019
8.56	1.008	0.195	0.047	0.020
8.58	1.001	0.202	0.046	0.022
8.60	0.997	0.215	0.046	0.020
8.62	0.998	0.223	0.049	0.022
8.64	0.990	0.228	0.047	0.024
8.66	0.983	0.242	0.049	0.023
8.68	0.981	0.254	0.049	0.026
8.70	0.976	0.263	0.049	0.026
8.72	0.967	0.277	0.050	0.029
8.74	0.964	0.294	0.049	0.029
8.76	0.960	0.309	0.050	0.032
8.78	0.956	0.326	0.047	0.034
8.80	0.953	0.346	0.048	0.034
8.82	0.954	0.368	0.046	0.035
8.84	0.957	0.389	0.047	0.036
8.86	0.962	0.411	0.045	0.038
8.88	0.971	0.433	0.044	0.039
8.90	0.982	0.449	0.043	0.040
8.92	0.989	0.468	0.042	0.040
8.94	1.004	0.486	0.043	0.040
8.96	1.015	0.500	0.043	0.043
8.98	1.029	0.518	0.039	0.043
9.00	1.046	0.532	0.040	0.043
9.02	1.065	0.543	0.040	0.045
9.04	1.079	0.550	0.037	0.046
9.06	1.098	0.563	0.038	0.045
9.08	1.119	0.563	0.037	0.048
9.10	1.131	0.566	0.034	0.048
9.12	1.146	0.569	0.033	0.048
9.14	1.162	0.569	0.030	0.048
9.16	1.172	0.565	0.030	0.046
9.18	1.180	0.566	0.030	0.046
9.20	1.187	0.565	0.029	0.046
9.22	1.196	0.568	0.031	0.044
9.24	1.205	0.562	0.030	0.048
9.26	1.203	0.560	0.027	0.046
9.28	1.202	0.562	0.028	0.046
9.30	1.201	0.570	0.027	0.045
9.32	1.206	0.574	0.029	0.046
9.34	1.200	0.578	0.028	0.046
9.36	1.197	0.593	0.029	0.046
9.38	1.199	0.608	0.029	0.046
9.40	1.203	0.622	0.030	0.047
9.42	1.203	0.639	0.030	0.047
9.44	1.210	0.660	0.031	0.050
9.46	1.217	0.680	0.030	0.048
9.48	1.230	0.704	0.034	0.051
9.50	1.241	0.723	0.031	0.054
9.52	1.256	0.753	0.032	0.055
9.54	1.281	0.778	0.032	0.056
9.56	1.309	0.802	0.034	0.058
9.58	1.339	0.822	0.032	0.062
9.60	1.375	0.844	0.032	0.063
9.62	1.414	0.859	0.033	0.067
9.64	1.461	0.876	0.032	0.073
9.66	1.515	0.876	0.027	0.076
9.68	1.565	0.871	0.025	0.083
9.70	1.614	0.853	0.020	0.086
9.72	1.655	0.836	0.017	0.087
9.74	1.698	0.806	0.010	0.091
9.76	1.723	0.776	0.008	0.090
9.78	1.748	0.748	0.010	0.087
9.80	1.766	0.723	0.013	0.084
9.82	1.787	0.695	0.017	0.082
9.84	1.793	0.672	0.019	0.078
9.86	1.812	0.659	0.022	0.075
9.88	1.829	0.637	0.023	0.075
9.90	1.848	0.620	0.029	0.073
9.92	1.869	0.597	0.029	0.070
9.94	1.889	0.571	0.035	0.066
9.96	1.907	0.542	0.033	0.060
9.98	1.924	0.506	0.035	0.063
10.00	1.930	0.472	0.040	0.060
10.02	1.940	0.435	0.041	0.054
10.04	1.932	0.398	0.040	0.051
10.06	1.930	0.371	0.041	0.052
10.08	1.917	0.347	0.042	0.056
10.10	1.933	0.336	0.056	0.056
10.12	1.942	0.276	0.068	0.037
10.14	1.908	0.236	0.060	0.019
10.16	1.885	0.216	0.045	0.015
10.18	1.863	0.198	0.042	0.017
10.20	1.840	0.186	0.039	0.015
10.22	1.825	0.180	0.037	0.013
10.24	1.813	0.168	0.036	0.011
10.26	1.798	0.160	0.033	0.011
10.28	1.785	0.152	0.029	0.011
10.30	1.773	0.144	0.028	0.011
10.32	1.759	0.137	0.027	0.011
10.34	1.748	0.133	0.027	0.011
10.36	1.735	0.127	0.023	0.011
10.38	1.727	0.124	0.023	0.008
10.40	1.712	0.118	0.021	0.008
10.42	1.705	0.121	0.022	0.006
10.44	1.697	0.112	0.020	0.009
10.46	1.685	0.112	0.018	0.006
10.48	1.673	0.108	0.016	0.006
10.50	1.664	0.116	0.016	0.006
10.52	1.662	0.110	0.016	0.009
10.54	1.648	0.112	0.015	0.006
10.56	1.646	0.114	0.014	0.007
10.58	1.637	0.113	0.012	0.007
10.60	1.631	0.115	0.011	0.009
10.62	1.625	0.118	0.013	0.006
10.64	1.623	0.121	0.012	0.007
10.66	1.620	0.121	0.011	0.007
10.68	1.615	0.121	0.009	0.007
10.70	1.611	0.123	0.008	0.009
10.72	1.605	0.123	0.011	0.009
10.74	1.601	0.130	0.010	0.007
10.76	1.603	0.131	0.010	0.007
10.78	1.598	0.132	0.009	0.007
10.80	1.595	0.136	0.008	0.009
10.82	1.594	0.142	0.009	0.011
10.84	1.597	0.145	0.007	0.011
10.86	1.597	0.148	0.008	0.011
10.88	1.600	0.151	0.006	0.011
10.90	1.603	0.155	0.007	0.012
10.92	1.610	0.157	0.009	0.012
10.94	1.616	0.154	0.010	0.011
10.96	1.620	0.153	0.008	0.011
10.98	1.629	0.151	0.009	0.011
11.00	1.633	0.140	0.008	0.012
11.02	1.634	0.137	0.010	0.007
11.04	1.638	0.128	0.009	0.011
11.06	1.636	0.122	0.008	0.011
11.08	1.635	0.115	0.007	0.011
11.10	1.633	0.112	0.007	0.007
11.12	1.636	0.105	0.007	0.007
11.14	1.632	0.098	0.007	0.007
11.16	1.630	0.092	0.006	0.007
11.18	1.626	0.087	0.008	0.007
11.20	1.622	0.081	0.006	0.007
11.22	1.616	0.080	0.006	0.004
11.24	1.616	0.076	0.008	0.004
11.26	1.611	0.072	0.007	0.004
11.28	1.607	0.068	0.007	0.004
11.30	1.600	0.068	0.007	0.006
11.32	1.600	0.068	0.005	0.004
11.34	1.597	0.065	0.005	0.004
11.36	1.594	0.062	0.004	0.004
11.38	1.590	0.062	0.004	0.004
11.40	1.590	0.059	0.004	0.004
11.42	1.583	0.056	0.005	0.004
11.44	1.582	0.059	0.005	0.001
11.46	1.582	0.056	0.005	0.001
11.48	1.578	0.053	0.005	0.001
11.50	1.575	0.053	0.006	0.004
11.52	1.575	0.051	0.004	0.004
11.54	1.571	0.048	0.004	0.004
11.56	1.568	0.045	0.003	0.004
11.58	1.561	0.046	0.003	0.004
11.60	1.561	0.048	0.005	0.001
11.62	1.561	0.046	0.003	0.001
11.64	1.559	0.044	0.004	0.001
11.66	1.557	0.042	0.004	0.001
11.68	1.553	0.039	0.006	0.001
11.70	1.549	0.040	0.006	0.004
11.72	1.549	0.038	0.005	0.004
11.74	1.542	0.036	0.006	0.004
11.76	1.540	0.039	0.005	0.002
11.78	1.540	0.038	0.004	0.002
11.80	1.538	0.036	0.003	0.002
11.82	1.535	0.035	0.003	0.002
11.84	1.533	0.034	0.004	0.002
11.86	1.530	0.033	0.004	0.002
11.88	1.528	0.031	0.005	0.002
11.90	1.522	0.030	0.005	0.002
11.92	1.519	0.032	0.007	0.001
11.94	1.517	0.033	0.007	0.004
11.96	1.516	0.032	0.006	0.004
11.98	1.513	0.031	0.006	0.004
12.00	1.510	0.031	0.005	0.004
12.02	1.508	0.030	0.005	0.004
12.04	1.503	0.029	0.004	0.004
12.06	1.500	0.032	0.004	0.004
12.08	1.499	0.031	0.006	0.004
12.10	1.495	0.031	0.006	0.004
12.12	1.493	0.030	0.008	0.004
12.14	1.488	0.030	0.008	0.004
12.16	1.485	0.030	0.010	0.004
12.18	1.480	0.032	0.010	0.004
12.20	1.478	0.033	0.010	0.004
12.22	1.473	0.033	0.010	0.004
12.24	1.469	0.035	0.011	0.004
12.26	1.463	0.037	0.011	0.004
12.28	1.460	0.041	0.013	0.004
12.30	1.454	0.043	0.014	0.006
12.32	1.450	0.050	0.014	0.002
12.34	1.447	0.054	0.012	0.004
12.36	1.442	0.062	0.012	0.004
12.38	1.442	0.071	0.014	0.004
12.40	1.443	0.076	0.014	0.006
12.42	1.441	0.086	0.012	0.006
12.44	1.449	0.096	0.012	0.006
12.46	1.455	0.098	0.013	0.008
12.48	1.459	0.101	0.013	0.009
12.50	1.461	0.107	0.010	0.009
12.52	1.474	0.113	0.008	0.007
12.54	1.482	0.106	0.010	0.008
12.56	1.485	0.106	0.010	0.006
12.58	1.491	0.101	0.006	0.009
12.60	1.491	0.099	0.011	0.009
12.62	1.497	0.098	0.007	0.005
12.64	1.499	0.091	0.007	0.007
12.66	1.496	0.087	0.008	0.006
12.68	1.495	0.086	0.010	0.006
12.70	1.493	0.085	0.010	0.006
12.72	1.492	0.086	0.011	0.006
12.74	1.492	0.087	0.011	0.006
12.76	1.493	0.088	0.012	0.006
12.78	1.494	0.089	0.013	0.006
12.80	1.496	0.090	0.014	0.006
12.82	1.499	0.090	0.011	0.006
12.84	1.502	0.089	0.011	0.006
12.86	1.505	0.087	0.011	0.006
12.88	1.507	0.085	0.011	0.006
12.90	1.510	0.082	0.011	0.006
12.92	1.510	0.078	0.012	0.006
12.94	1.511	0.077	0.011	0.005
12.96	1.514	0.072	0.011	0.005
12.98	1.511	0.067	0.010	0.005
13.00	1.510	0.066	0.011	0.005
13.02	1.509	0.062	0.011	0.005
13.04	1.506	0.061	0.012	0.004
13.06	1.507	0.058	0.011	0.004
13.08	1.502	0.055	0.012	0.004
13.10	1.499	0.056	0.011	0.002
13.12	1.497	0.056	0.012	0.005
13.14	1.497	0.058	0.012	0.004
13.16	1.498	0.056	0.012	0.004
13.18	1.497	0.055	0.012	0.004
13.20	1.497	0.053	0.010	0.004
13.22	1.493	0.052	0.012	0.004
13.24	1.492	0.055	0.015	0.002
13.26	1.494	0.054	0.012	0.002
13.28	1.492	0.053	0.014	0.002
13.30	1.493	0.054	0.012	0.004
13.32	1.494	0.050	0.012	0.005
13.34	1.490	0.049	0.014	0.005
13.36	1.489	0.050	0.014	0.005
13.38	1.489	0.049	0.013	0.005
13.40	1.487	0.048	0.014	0.005
13.42	1.485	0.050	0.014	0.004
13.44	1.487	0.051	0.014	0.006
13.46	1.487	0.049	0.012	0.006
13.48	1.486	0.051	0.013	0.004
13.50	1.490	0.050	0.011	0.004
13.52	1.490	0.045	0.011	0.004
13.54	1.488	0.043	0.012	0.004
13.56	1.484	0.042	0.012	0.004
13.58	1.485	0.045	0.010	0.003
13.60	1.486	0.040	0.011	0.004
13.62	1.482	0.039	0.013	0.004
13.64	1.482	0.038	0.014	0.004
13.66	1.477	0.037	0.015	0.004
13.68	1.476	0.040	0.015	0.003
13.70	1.476	0.040	0.016	0.003
13.72	1.476	0.039	0.016	0.003
13.74	1.475	0.039	0.017	0.003
13.76	1.474	0.038	0.018	0.002
13.78	1.472	0.038	0.018	0.003
13.80	1.470	0.038	0.019	0.003
13.82	1.469	0.040	0.020	0.001
13.84	1.470	0.040	0.019	0.001
13.86	1.469	0.039	0.020	0.001
13.88	1.468	0.039	0.020	0.001
13.90	1.467	0.039	0.020	0.001
13.92	1.467	0.039	0.021	0.001
13.94	1.465	0.039	0.021	0.001
13.96	1.465	0.040	0.022	0.001
13.98	1.465	0.040	0.022	0.001
14.00	1.464	0.040	0.023	0.001
14.02	1.464	0.040	0.023	0.001
14.04	1.463	0.040	0.025	0.001
14.06	1.463	0.040	0.026	0.004
14.08	1.462	0.040	0.025	0.004
14.10	1.462	0.040	0.027	0.004
14.12	1.462	0.040	0.026	0.004
14.14	1.461	0.040	0.027	0.004
14.16	1.461	0.040	0.027	0.004
14.18	1.460	0.040	0.029	0.004
14.20	1.460	0.040	0.029	0.004
14.22	1.459	0.040	0.029	0.004
14.24	1.459	0.040	0.031	0.004
14.26	1.458	0.040	0.032	0.005
14.28	1.458	0.040	0.034	0.005
14.30	1.458	0.040	0.036	0.010
14.32	1.458	0.040	0.032	0.010
14.34	1.457	0.040	0.035	0.012
14.36	1.457	0.040	0.033	0.014
14.38	1.456	0.040	0.035	0.014
14.40	1.456	0.040	0.034	0.015
14.42	1.456	0.040	0.035	0.017
14.44	1.456	0.040	0.034	0.019
14.46	1.455	0.040	0.034	0.022
14.48	1.455	0.040	0.032	0.024
14.50	1.454	0.040	0.032	0.026
14.52	1.455	0.040	0.028	0.026
14.54	1.454	0.040	0.031	0.026
14.56	1.454	0.040	0.029	0.029
14.58	1.454	0.040	0.031	0.031
14.60	1.454	0.040	0.027	0.033
14.62	1.453	0.040	0.029	0.034
14.64	1.454	0.040	0.025	0.035
14.66	1.453	0.040	0.026	0.033
14.68	1.454	0.040	0.025	0.033
14.70	1.453	0.040	0.028	0.036
14.72	1.454	0.040	0.024	0.033
14.74	1.453	0.040	0.029	0.033
14.76	1.454	0.040	0.025	0.033
14.78	1.453	0.040	0.031	0.034
14.80	1.454	0.040	0.027	0.034
14.82	1.454	0.040	0.034	0.037
14.84	1.455	0.040	0.027	0.034
14.86	1.454	0.040	0.038	0.029
14.88	1.456	0.040	0.028	0.030
14.90	1.456	0.040	0.042	0.024
14.92	1.458	0.040	0.036	0.022
14.94	1.458	0.040	0.052	0.034
14.96	1.463	0.040	0.045	0.035
14.98	1.462	0.040	0.071	0.034
15.00	1.478	0.040	0.069	0.033
