# Supplementary material for: Global scale variability of the mineral dust longwave refractive index: a new dataset of in situ measurements for climate modelling and remote sensing
Source: Copernicus journal article supplement (doi:10.5194/acp-2016-616), 2016-10-19
Supplement: Supplementary file 1 [file acp-2016-616-supplement.zip › Supplementary_DiBiagio_ACPD/CRI_results_Patagonia.txt]

wavelength(microns)	real_part(n)	imaginary_part(k)	standard_deviation(n)	standard_deviation(k)
3.00	1.464	0.002	0.060	0.001
3.02	1.442	0.002	0.013	0.001
3.04	1.444	0.002	0.029	0.001
3.06	1.435	0.002	0.014	0.001
3.08	1.436	0.002	0.017	0.001
3.10	1.430	0.002	0.018	0.001
3.12	1.431	0.002	0.021	0.001
3.14	1.426	0.002	0.027	0.001
3.16	1.427	0.002	0.024	0.001
3.18	1.423	0.002	0.027	0.001
3.20	1.423	0.002	0.021	0.001
3.22	1.420	0.002	0.023	0.001
3.24	1.420	0.002	0.017	0.001
3.26	1.417	0.002	0.018	0.001
3.28	1.417	0.002	0.014	0.001
3.30	1.415	0.002	0.014	0.001
3.32	1.415	0.002	0.011	0.001
3.34	1.413	0.002	0.010	0.001
3.36	1.412	0.002	0.010	0.001
3.38	1.410	0.002	0.008	0.001
3.40	1.410	0.002	0.009	0.001
3.42	1.408	0.002	0.007	0.001
3.44	1.408	0.002	0.009	0.001
3.46	1.406	0.002	0.007	0.001
3.48	1.406	0.002	0.010	0.001
3.50	1.404	0.002	0.007	0.001
3.52	1.404	0.002	0.010	0.001
3.54	1.402	0.002	0.008	0.001
3.56	1.402	0.002	0.011	0.001
3.58	1.400	0.002	0.008	0.001
3.60	1.400	0.002	0.012	0.001
3.62	1.398	0.002	0.009	0.001
3.64	1.398	0.002	0.012	0.001
3.66	1.397	0.002	0.010	0.001
3.68	1.396	0.002	0.013	0.001
3.70	1.395	0.002	0.010	0.001
3.72	1.394	0.002	0.013	0.001
3.74	1.393	0.002	0.011	0.001
3.76	1.393	0.002	0.014	0.001
3.78	1.391	0.002	0.011	0.001
3.80	1.391	0.002	0.014	0.001
3.82	1.390	0.002	0.012	0.001
3.84	1.389	0.002	0.014	0.001
3.86	1.388	0.002	0.012	0.001
3.88	1.388	0.002	0.015	0.001
3.90	1.386	0.002	0.013	0.001
3.92	1.386	0.002	0.016	0.001
3.94	1.385	0.002	0.014	0.001
3.96	1.384	0.002	0.016	0.001
3.98	1.383	0.002	0.014	0.001
4.00	1.383	0.002	0.016	0.001
4.02	1.381	0.002	0.014	0.001
4.04	1.381	0.002	0.017	0.001
4.06	1.380	0.002	0.015	0.001
4.08	1.380	0.002	0.017	0.001
4.10	1.378	0.002	0.015	0.001
4.12	1.378	0.002	0.017	0.001
4.14	1.377	0.002	0.015	0.001
4.16	1.376	0.002	0.017	0.001
4.18	1.375	0.002	0.016	0.001
4.20	1.375	0.002	0.018	0.001
4.22	1.374	0.002	0.017	0.001
4.24	1.373	0.002	0.019	0.001
4.26	1.372	0.002	0.018	0.001
4.28	1.372	0.002	0.020	0.001
4.30	1.371	0.002	0.019	0.001
4.32	1.370	0.002	0.021	0.001
4.34	1.369	0.002	0.020	0.001
4.36	1.369	0.002	0.022	0.001
4.38	1.367	0.002	0.020	0.001
4.40	1.367	0.002	0.022	0.001
4.42	1.366	0.002	0.021	0.001
4.44	1.366	0.002	0.023	0.001
4.46	1.364	0.002	0.021	0.001
4.48	1.364	0.002	0.023	0.001
4.50	1.363	0.002	0.021	0.001
4.52	1.362	0.002	0.023	0.001
4.54	1.361	0.002	0.022	0.001
4.56	1.361	0.002	0.024	0.001
4.58	1.360	0.002	0.022	0.001
4.60	1.359	0.002	0.024	0.001
4.62	1.358	0.002	0.023	0.001
4.64	1.358	0.002	0.024	0.001
4.66	1.357	0.002	0.023	0.001
4.68	1.356	0.002	0.024	0.001
4.70	1.355	0.002	0.023	0.001
4.72	1.355	0.002	0.025	0.001
4.74	1.354	0.002	0.024	0.001
4.76	1.353	0.002	0.024	0.001
4.78	1.352	0.002	0.023	0.001
4.80	1.352	0.002	0.026	0.001
4.82	1.351	0.002	0.024	0.001
4.84	1.350	0.002	0.026	0.001
4.86	1.349	0.002	0.025	0.001
4.88	1.349	0.002	0.025	0.001
4.90	1.347	0.002	0.024	0.001
4.92	1.347	0.002	0.026	0.001
4.94	1.346	0.002	0.025	0.001
4.96	1.345	0.002	0.027	0.001
4.98	1.344	0.002	0.026	0.001
5.00	1.344	0.002	0.028	0.001
5.02	1.343	0.002	0.027	0.001
5.04	1.342	0.002	0.028	0.001
5.06	1.341	0.002	0.027	0.001
5.08	1.341	0.002	0.028	0.001
5.10	1.340	0.002	0.027	0.001
5.12	1.339	0.002	0.029	0.001
5.14	1.338	0.002	0.027	0.001
5.16	1.337	0.002	0.029	0.001
5.18	1.336	0.002	0.029	0.001
5.20	1.336	0.002	0.029	0.001
5.22	1.335	0.002	0.029	0.001
5.24	1.334	0.002	0.030	0.001
5.26	1.333	0.002	0.029	0.001
5.28	1.332	0.002	0.030	0.001
5.30	1.331	0.002	0.029	0.001
5.32	1.331	0.002	0.030	0.001
5.34	1.330	0.002	0.030	0.001
5.36	1.329	0.002	0.031	0.001
5.38	1.328	0.002	0.030	0.001
5.40	1.327	0.002	0.031	0.001
5.42	1.326	0.002	0.031	0.001
5.44	1.326	0.002	0.032	0.001
5.46	1.324	0.002	0.031	0.001
5.48	1.324	0.002	0.032	0.001
5.50	1.323	0.002	0.031	0.001
5.52	1.322	0.002	0.033	0.001
5.54	1.321	0.002	0.032	0.001
5.56	1.320	0.002	0.032	0.001
5.58	1.319	0.002	0.031	0.001
5.60	1.318	0.002	0.033	0.001
5.62	1.317	0.002	0.033	0.001
5.64	1.317	0.002	0.033	0.001
5.66	1.315	0.002	0.033	0.001
5.68	1.315	0.002	0.033	0.001
5.70	1.314	0.002	0.033	0.001
5.72	1.313	0.002	0.034	0.001
5.74	1.312	0.002	0.034	0.001
5.76	1.311	0.002	0.035	0.001
5.78	1.310	0.002	0.035	0.001
5.80	1.309	0.002	0.035	0.001
5.82	1.308	0.002	0.035	0.001
5.84	1.307	0.002	0.035	0.001
5.86	1.306	0.002	0.035	0.001
5.88	1.305	0.002	0.035	0.001
5.90	1.304	0.002	0.035	0.001
5.92	1.303	0.002	0.035	0.001
5.94	1.302	0.002	0.035	0.001
5.96	1.301	0.002	0.036	0.001
5.98	1.300	0.002	0.034	0.001
6.00	1.299	0.002	0.035	0.001
6.02	1.298	0.002	0.033	0.001
6.04	1.297	0.002	0.034	0.001
6.06	1.295	0.002	0.033	0.001
6.08	1.295	0.002	0.034	0.001
6.10	1.293	0.002	0.033	0.001
6.12	1.292	0.002	0.034	0.001
6.14	1.291	0.002	0.032	0.001
6.16	1.290	0.002	0.033	0.001
6.18	1.289	0.002	0.033	0.001
6.20	1.288	0.002	0.033	0.001
6.22	1.287	0.002	0.033	0.001
6.24	1.285	0.002	0.035	0.001
6.26	1.284	0.002	0.035	0.001
6.28	1.283	0.002	0.036	0.001
6.30	1.282	0.002	0.037	0.001
6.32	1.281	0.002	0.037	0.001
6.34	1.279	0.002	0.037	0.001
6.36	1.278	0.002	0.038	0.001
6.38	1.277	0.002	0.038	0.001
6.40	1.276	0.002	0.039	0.001
6.42	1.274	0.002	0.038	0.001
6.44	1.273	0.002	0.038	0.001
6.46	1.272	0.002	0.037	0.001
6.48	1.270	0.002	0.038	0.001
6.50	1.269	0.002	0.037	0.001
6.52	1.268	0.002	0.036	0.001
6.54	1.266	0.002	0.035	0.001
6.56	1.265	0.002	0.036	0.001
6.58	1.263	0.002	0.035	0.001
6.60	1.262	0.002	0.035	0.001
6.62	1.260	0.002	0.035	0.001
6.64	1.259	0.002	0.035	0.001
6.66	1.257	0.002	0.035	0.001
6.68	1.256	0.002	0.035	0.001
6.70	1.254	0.002	0.035	0.001
6.72	1.253	0.002	0.035	0.001
6.74	1.251	0.002	0.035	0.001
6.76	1.250	0.002	0.036	0.001
6.78	1.248	0.002	0.036	0.001
6.80	1.246	0.002	0.037	0.001
6.82	1.245	0.002	0.036	0.001
6.84	1.243	0.002	0.037	0.001
6.86	1.241	0.002	0.038	0.001
6.88	1.240	0.002	0.038	0.001
6.90	1.238	0.002	0.039	0.001
6.92	1.236	0.002	0.039	0.001
6.94	1.234	0.002	0.039	0.001
6.96	1.232	0.002	0.040	0.001
6.98	1.230	0.002	0.039	0.001
7.00	1.228	0.002	0.040	0.001
7.02	1.226	0.002	0.041	0.001
7.04	1.224	0.002	0.041	0.001
7.06	1.222	0.002	0.041	0.001
7.08	1.220	0.002	0.042	0.001
7.10	1.218	0.002	0.042	0.001
7.12	1.216	0.002	0.042	0.001
7.14	1.213	0.002	0.042	0.001
7.16	1.211	0.002	0.042	0.001
7.18	1.209	0.002	0.042	0.001
7.20	1.206	0.002	0.043	0.001
7.22	1.204	0.002	0.043	0.001
7.24	1.201	0.002	0.044	0.001
7.26	1.199	0.002	0.044	0.001
7.28	1.196	0.002	0.044	0.001
7.30	1.193	0.002	0.045	0.001
7.32	1.191	0.002	0.045	0.001
7.34	1.188	0.002	0.045	0.001
7.36	1.185	0.002	0.046	0.001
7.38	1.182	0.002	0.046	0.001
7.40	1.179	0.002	0.047	0.001
7.42	1.176	0.002	0.047	0.001
7.44	1.172	0.002	0.048	0.001
7.46	1.169	0.002	0.048	0.001
7.48	1.165	0.002	0.049	0.001
7.50	1.161	0.002	0.049	0.001
7.52	1.158	0.002	0.050	0.001
7.54	1.153	0.002	0.050	0.001
7.56	1.149	0.002	0.050	0.001
7.58	1.143	0.002	0.051	0.001
7.60	1.139	0.004	0.052	0.002
7.62	1.134	0.005	0.052	0.003
7.64	1.130	0.007	0.053	0.003
7.66	1.125	0.008	0.054	0.005
7.68	1.121	0.010	0.055	0.005
7.70	1.116	0.011	0.055	0.005
7.72	1.112	0.013	0.056	0.004
7.74	1.108	0.014	0.057	0.004
7.76	1.103	0.016	0.058	0.004
7.78	1.099	0.017	0.059	0.004
7.80	1.094	0.019	0.060	0.004
7.82	1.090	0.020	0.061	0.004
7.84	1.086	0.022	0.062	0.004
7.86	1.082	0.020	0.063	0.004
7.88	1.073	0.020	0.064	0.004
7.90	1.066	0.023	0.066	0.005
7.92	1.060	0.024	0.066	0.005
7.94	1.052	0.026	0.068	0.005
7.96	1.045	0.029	0.069	0.005
7.98	1.038	0.031	0.071	0.006
8.00	1.031	0.034	0.072	0.006
8.02	1.022	0.035	0.073	0.007
8.04	1.013	0.039	0.074	0.007
8.06	1.004	0.042	0.076	0.008
8.08	0.993	0.048	0.078	0.008
8.10	0.986	0.053	0.079	0.009
8.12	0.975	0.057	0.081	0.010
8.14	0.965	0.064	0.083	0.011
8.16	0.954	0.070	0.084	0.012
8.18	0.944	0.078	0.085	0.014
8.20	0.932	0.085	0.087	0.015
8.22	0.920	0.097	0.090	0.016
8.24	0.911	0.108	0.091	0.019
8.26	0.900	0.120	0.093	0.021
8.28	0.891	0.134	0.094	0.023
8.30	0.882	0.147	0.095	0.025
8.32	0.872	0.161	0.096	0.029
8.34	0.863	0.178	0.098	0.031
8.36	0.857	0.197	0.099	0.033
8.38	0.853	0.213	0.099	0.037
8.40	0.847	0.232	0.099	0.040
8.42	0.845	0.251	0.100	0.044
8.44	0.841	0.269	0.099	0.046
8.46	0.842	0.291	0.099	0.049
8.48	0.844	0.310	0.098	0.051
8.50	0.849	0.328	0.097	0.053
8.52	0.853	0.342	0.096	0.056
8.54	0.856	0.357	0.095	0.058
8.56	0.858	0.371	0.094	0.060
8.58	0.860	0.387	0.093	0.062
8.60	0.863	0.403	0.093	0.064
8.62	0.867	0.419	0.092	0.067
8.64	0.871	0.434	0.090	0.068
8.66	0.874	0.449	0.090	0.069
8.68	0.877	0.465	0.089	0.072
8.70	0.881	0.481	0.088	0.074
8.72	0.883	0.499	0.087	0.075
8.74	0.887	0.519	0.087	0.078
8.76	0.893	0.541	0.085	0.081
8.78	0.904	0.563	0.084	0.083
8.80	0.915	0.582	0.082	0.085
8.82	0.927	0.603	0.080	0.088
8.84	0.941	0.622	0.078	0.089
8.86	0.958	0.642	0.076	0.091
8.88	0.975	0.656	0.074	0.093
8.90	0.990	0.674	0.072	0.095
8.92	1.010	0.691	0.070	0.097
8.94	1.031	0.707	0.067	0.098
8.96	1.055	0.720	0.065	0.100
8.98	1.078	0.732	0.062	0.102
9.00	1.104	0.742	0.059	0.103
9.02	1.130	0.749	0.057	0.103
9.04	1.158	0.753	0.053	0.105
9.06	1.183	0.754	0.050	0.105
9.08	1.209	0.754	0.046	0.105
9.10	1.236	0.749	0.043	0.104
9.12	1.258	0.740	0.040	0.103
9.14	1.278	0.731	0.038	0.102
9.16	1.296	0.719	0.035	0.100
9.18	1.308	0.706	0.034	0.099
9.20	1.319	0.695	0.032	0.097
9.22	1.326	0.682	0.032	0.095
9.24	1.329	0.673	0.031	0.094
9.26	1.329	0.666	0.031	0.092
9.28	1.328	0.663	0.031	0.092
9.30	1.326	0.663	0.032	0.092
9.32	1.325	0.668	0.031	0.093
9.34	1.326	0.676	0.032	0.093
9.36	1.330	0.687	0.031	0.094
9.38	1.338	0.697	0.031	0.096
9.40	1.346	0.707	0.030	0.097
9.42	1.356	0.721	0.030	0.099
9.44	1.371	0.734	0.028	0.101
9.46	1.388	0.747	0.027	0.102
9.48	1.411	0.758	0.025	0.104
9.50	1.433	0.766	0.023	0.106
9.52	1.461	0.774	0.021	0.107
9.54	1.490	0.775	0.019	0.108
9.56	1.518	0.774	0.018	0.108
9.58	1.545	0.769	0.018	0.108
9.60	1.573	0.764	0.018	0.107
9.62	1.600	0.754	0.020	0.107
9.64	1.627	0.744	0.022	0.105
9.66	1.656	0.727	0.024	0.103
9.68	1.677	0.708	0.026	0.100
9.70	1.699	0.688	0.028	0.098
9.72	1.717	0.665	0.030	0.094
9.74	1.731	0.641	0.031	0.090
9.76	1.740	0.619	0.032	0.087
9.78	1.750	0.597	0.033	0.084
9.80	1.754	0.575	0.033	0.080
9.82	1.758	0.557	0.034	0.078
9.84	1.762	0.539	0.034	0.074
9.86	1.764	0.522	0.034	0.072
9.88	1.764	0.506	0.034	0.069
9.90	1.764	0.494	0.033	0.068
9.92	1.766	0.482	0.034	0.066
9.94	1.768	0.470	0.034	0.065
9.96	1.769	0.460	0.035	0.064
9.98	1.771	0.450	0.035	0.063
10.00	1.776	0.443	0.035	0.062
10.02	1.784	0.430	0.036	0.061
10.04	1.785	0.418	0.037	0.059
10.06	1.792	0.407	0.036	0.058
10.08	1.795	0.393	0.036	0.056
10.10	1.801	0.380	0.037	0.054
10.12	1.804	0.363	0.037	0.052
10.14	1.806	0.349	0.037	0.049
10.16	1.806	0.331	0.037	0.046
10.18	1.804	0.317	0.036	0.044
10.20	1.803	0.303	0.036	0.041
10.22	1.802	0.287	0.035	0.039
10.24	1.796	0.272	0.034	0.036
10.26	1.792	0.260	0.033	0.034
10.28	1.787	0.245	0.032	0.032
10.30	1.778	0.235	0.030	0.031
10.32	1.773	0.225	0.030	0.029
10.34	1.766	0.216	0.027	0.028
10.36	1.761	0.208	0.027	0.027
10.38	1.754	0.198	0.026	0.026
10.40	1.745	0.195	0.025	0.025
10.42	1.747	0.190	0.024	0.024
10.44	1.741	0.175	0.023	0.023
10.46	1.731	0.170	0.022	0.023
10.48	1.723	0.165	0.021	0.022
10.50	1.720	0.165	0.020	0.022
10.52	1.720	0.155	0.020	0.022
10.54	1.711	0.150	0.018	0.022
10.56	1.711	0.145	0.018	0.021
10.58	1.705	0.135	0.018	0.022
10.60	1.697	0.130	0.017	0.021
10.62	1.692	0.125	0.016	0.021
10.64	1.684	0.118	0.016	0.021
10.66	1.675	0.116	0.015	0.021
10.68	1.670	0.114	0.016	0.021
10.70	1.664	0.112	0.015	0.021
10.72	1.659	0.110	0.015	0.021
10.74	1.654	0.108	0.014	0.021
10.76	1.650	0.106	0.015	0.021
10.78	1.645	0.104	0.014	0.020
10.80	1.641	0.102	0.014	0.021
10.82	1.636	0.100	0.014	0.021
10.84	1.632	0.100	0.014	0.021
10.86	1.630	0.098	0.013	0.021
10.88	1.624	0.095	0.013	0.021
10.90	1.619	0.099	0.014	0.020
10.92	1.623	0.096	0.013	0.020
10.94	1.614	0.090	0.013	0.021
10.96	1.610	0.095	0.013	0.019
10.98	1.611	0.094	0.013	0.019
11.00	1.609	0.093	0.014	0.019
11.02	1.610	0.091	0.014	0.019
11.04	1.607	0.085	0.013	0.019
11.06	1.600	0.085	0.013	0.019
11.08	1.602	0.086	0.013	0.019
11.10	1.599	0.080	0.013	0.019
11.12	1.595	0.081	0.013	0.018
11.14	1.595	0.078	0.013	0.019
11.16	1.592	0.075	0.014	0.018
11.18	1.588	0.072	0.013	0.018
11.20	1.584	0.073	0.014	0.018
11.22	1.583	0.071	0.014	0.018
11.24	1.579	0.069	0.013	0.018
11.26	1.577	0.068	0.013	0.018
11.28	1.573	0.066	0.013	0.018
11.30	1.571	0.067	0.014	0.018
11.32	1.569	0.065	0.013	0.017
11.34	1.565	0.065	0.014	0.017
11.36	1.566	0.065	0.014	0.017
11.38	1.563	0.060	0.015	0.018
11.40	1.559	0.062	0.014	0.017
11.42	1.560	0.061	0.014	0.017
11.44	1.557	0.057	0.014	0.018
11.46	1.554	0.056	0.015	0.018
11.48	1.551	0.055	0.014	0.018
11.50	1.547	0.055	0.015	0.017
11.52	1.546	0.057	0.015	0.017
11.54	1.547	0.053	0.015	0.017
11.56	1.542	0.051	0.015	0.018
11.58	1.540	0.050	0.015	0.017
11.60	1.535	0.050	0.015	0.017
11.62	1.535	0.051	0.016	0.017
11.64	1.534	0.049	0.016	0.017
11.66	1.530	0.047	0.016	0.017
11.68	1.527	0.048	0.017	0.017
11.70	1.527	0.047	0.017	0.016
11.72	1.523	0.045	0.017	0.017
11.74	1.520	0.046	0.017	0.017
11.76	1.518	0.047	0.018	0.016
11.78	1.519	0.045	0.018	0.016
11.80	1.514	0.042	0.018	0.017
11.82	1.512	0.043	0.018	0.017
11.84	1.509	0.042	0.019	0.017
11.86	1.508	0.043	0.019	0.016
11.88	1.503	0.041	0.019	0.017
11.90	1.502	0.047	0.019	0.016
11.92	1.505	0.042	0.018	0.016
11.94	1.498	0.040	0.020	0.016
11.96	1.496	0.042	0.020	0.016
11.98	1.494	0.041	0.021	0.016
12.00	1.491	0.041	0.021	0.016
12.02	1.489	0.043	0.021	0.016
12.04	1.488	0.042	0.022	0.017
12.06	1.486	0.041	0.022	0.017
12.08	1.483	0.040	0.021	0.017
12.10	1.479	0.041	0.023	0.017
12.12	1.477	0.041	0.022	0.017
12.14	1.475	0.042	0.022	0.017
12.16	1.474	0.041	0.023	0.017
12.18	1.468	0.040	0.024	0.017
12.20	1.466	0.042	0.024	0.017
12.22	1.462	0.041	0.025	0.017
12.24	1.457	0.043	0.025	0.018
12.26	1.455	0.045	0.027	0.018
12.28	1.451	0.044	0.026	0.019
12.30	1.442	0.048	0.028	0.019
12.32	1.439	0.056	0.028	0.019
12.34	1.438	0.061	0.029	0.021
12.36	1.437	0.066	0.029	0.022
12.38	1.434	0.070	0.029	0.023
12.40	1.434	0.080	0.029	0.024
12.42	1.440	0.085	0.028	0.026
12.44	1.441	0.087	0.028	0.027
12.46	1.443	0.094	0.027	0.027
12.48	1.451	0.096	0.026	0.028
12.50	1.453	0.096	0.025	0.029
12.52	1.458	0.099	0.024	0.029
12.54	1.462	0.096	0.023	0.029
12.56	1.464	0.096	0.022	0.028
12.58	1.467	0.094	0.023	0.028
12.60	1.469	0.094	0.022	0.027
12.62	1.470	0.091	0.022	0.026
12.64	1.470	0.091	0.022	0.026
12.66	1.472	0.089	0.021	0.026
12.68	1.470	0.088	0.021	0.026
12.70	1.470	0.089	0.022	0.026
12.72	1.470	0.091	0.021	0.026
12.74	1.473	0.091	0.021	0.026
12.76	1.474	0.091	0.021	0.026
12.78	1.476	0.091	0.021	0.027
12.80	1.477	0.091	0.020	0.027
12.82	1.480	0.091	0.021	0.027
12.84	1.482	0.091	0.019	0.027
12.86	1.487	0.089	0.019	0.026
12.88	1.487	0.085	0.018	0.026
12.90	1.489	0.085	0.018	0.025
12.92	1.492	0.080	0.017	0.025
12.94	1.492	0.077	0.018	0.024
12.96	1.494	0.072	0.017	0.024
12.98	1.489	0.067	0.018	0.024
13.00	1.489	0.069	0.018	0.023
13.02	1.490	0.064	0.018	0.023
13.04	1.486	0.064	0.019	0.023
13.06	1.489	0.061	0.019	0.023
13.08	1.484	0.056	0.019	0.023
13.10	1.482	0.056	0.019	0.023
13.12	1.478	0.056	0.020	0.023
13.14	1.480	0.059	0.020	0.023
13.16	1.480	0.053	0.019	0.023
13.18	1.475	0.053	0.020	0.023
13.20	1.474	0.053	0.020	0.022
13.22	1.472	0.056	0.021	0.023
13.24	1.477	0.056	0.020	0.022
13.26	1.476	0.050	0.020	0.023
13.28	1.472	0.050	0.021	0.023
13.30	1.472	0.050	0.021	0.023
13.32	1.470	0.048	0.021	0.023
13.34	1.468	0.048	0.021	0.023
13.36	1.466	0.048	0.021	0.023
13.38	1.466	0.048	0.021	0.023
13.40	1.464	0.048	0.021	0.023
13.42	1.464	0.048	0.022	0.023
13.44	1.462	0.047	0.021	0.023
13.46	1.461	0.048	0.021	0.023
13.48	1.461	0.048	0.022	0.023
13.50	1.460	0.048	0.022	0.023
13.52	1.459	0.048	0.022	0.023
13.54	1.459	0.048	0.022	0.023
13.56	1.458	0.048	0.022	0.023
13.58	1.458	0.048	0.022	0.023
13.60	1.455	0.048	0.023	0.017
13.62	1.459	0.053	0.023	0.022
13.64	1.462	0.045	0.022	0.021
13.66	1.456	0.045	0.023	0.017
13.68	1.457	0.045	0.023	0.021
13.70	1.454	0.045	0.023	0.017
13.72	1.455	0.045	0.023	0.021
13.74	1.453	0.045	0.023	0.014
13.76	1.453	0.045	0.023	0.014
13.78	1.452	0.045	0.023	0.021
13.80	1.452	0.045	0.023	0.021
13.82	1.453	0.045	0.023	0.014
13.84	1.453	0.042	0.023	0.021
13.86	1.450	0.042	0.023	0.021
13.88	1.450	0.042	0.023	0.021
13.90	1.448	0.042	0.023	0.014
13.92	1.448	0.042	0.024	0.021
13.94	1.446	0.042	0.024	0.014
13.96	1.446	0.042	0.024	0.021
13.98	1.445	0.042	0.023	0.017
14.00	1.445	0.042	0.024	0.017
14.02	1.443	0.042	0.024	0.021
14.04	1.444	0.042	0.024	0.021
14.06	1.442	0.042	0.024	0.014
14.08	1.443	0.042	0.025	0.021
14.10	1.441	0.042	0.024	0.014
14.12	1.441	0.042	0.025	0.017
14.14	1.438	0.042	0.025	0.015
14.16	1.440	0.045	0.025	0.021
14.18	1.439	0.042	0.025	0.017
14.20	1.437	0.045	0.026	0.013
14.22	1.439	0.045	0.025	0.021
14.24	1.438	0.045	0.026	0.014
14.26	1.437	0.045	0.025	0.015
14.28	1.437	0.047	0.026	0.014
14.30	1.439	0.047	0.025	0.014
14.32	1.439	0.047	0.026	0.013
14.34	1.439	0.047	0.024	0.015
14.36	1.440	0.047	0.025	0.021
14.38	1.440	0.047	0.024	0.021
14.40	1.440	0.047	0.025	0.015
14.42	1.441	0.047	0.023	0.014
14.44	1.441	0.047	0.025	0.021
14.46	1.443	0.047	0.023	0.017
14.48	1.444	0.045	0.025	0.014
14.50	1.444	0.045	0.023	0.013
14.52	1.445	0.042	0.026	0.015
14.54	1.442	0.042	0.023	0.021
14.56	1.445	0.042	0.025	0.021
14.58	1.443	0.040	0.023	0.021
14.60	1.443	0.040	0.025	0.021
14.62	1.442	0.040	0.023	0.015
14.64	1.445	0.040	0.025	0.014
14.66	1.444	0.037	0.023	0.014
14.68	1.443	0.037	0.026	0.015
14.70	1.442	0.037	0.023	0.013
14.72	1.443	0.037	0.026	0.021
14.74	1.442	0.037	0.023	0.021
14.76	1.444	0.037	0.027	0.013
14.78	1.445	0.037	0.023	0.021
14.80	1.449	0.033	0.028	0.017
14.82	1.444	0.031	0.024	0.015
14.84	1.448	0.031	0.031	0.021
14.86	1.444	0.028	0.025	0.021
14.88	1.447	0.028	0.035	0.015
14.90	1.442	0.025	0.028	0.013
14.92	1.447	0.028	0.041	0.013
14.94	1.442	0.021	0.033	0.021
14.96	1.442	0.028	0.055	0.015
14.98	1.443	0.028	0.042	0.021
15.00	1.460	0.033	0.106	0.013
