# Supplementary material for: Global scale variability of the mineral dust longwave refractive index: a new dataset of in situ measurements for climate modelling and remote sensing
Source: Copernicus journal article supplement (doi:10.5194/acp-2016-616), 2016-10-19
Supplement: Supplementary file 1 [file acp-2016-616-supplement.zip › Supplementary_DiBiagio_ACPD/CRI_results_Tunisia.txt]

wavelength(microns)	real_part(n)	imaginary_part(k)	standard_deviation(n)	standard_deviation(k)
3.00	1.452	0.006	0.060	0.002
3.02	1.449	0.006	0.059	0.002
3.04	1.449	0.006	0.031	0.002
3.06	1.448	0.006	0.033	0.002
3.08	1.447	0.006	0.022	0.002
3.10	1.446	0.006	0.022	0.002
3.12	1.446	0.006	0.016	0.002
3.14	1.445	0.006	0.017	0.002
3.16	1.445	0.006	0.013	0.002
3.18	1.444	0.006	0.014	0.002
3.20	1.443	0.006	0.011	0.002
3.22	1.443	0.006	0.012	0.002
3.24	1.442	0.006	0.010	0.002
3.26	1.442	0.006	0.010	0.002
3.28	1.441	0.006	0.008	0.002
3.30	1.441	0.006	0.008	0.002
3.32	1.440	0.006	0.007	0.002
3.34	1.440	0.006	0.007	0.002
3.36	1.439	0.006	0.006	0.002
3.38	1.439	0.006	0.007	0.002
3.40	1.438	0.006	0.005	0.002
3.42	1.438	0.006	0.005	0.002
3.44	1.437	0.006	0.004	0.002
3.46	1.437	0.006	0.004	0.002
3.48	1.436	0.006	0.005	0.002
3.50	1.436	0.006	0.005	0.002
3.52	1.435	0.006	0.004	0.002
3.54	1.435	0.006	0.004	0.002
3.56	1.434	0.006	0.003	0.002
3.58	1.434	0.006	0.003	0.002
3.60	1.433	0.006	0.003	0.002
3.62	1.433	0.006	0.003	0.002
3.64	1.432	0.006	0.003	0.002
3.66	1.432	0.006	0.002	0.002
3.68	1.432	0.006	0.003	0.002
3.70	1.431	0.006	0.002	0.002
3.72	1.431	0.006	0.003	0.002
3.74	1.430	0.006	0.002	0.002
3.76	1.430	0.006	0.002	0.002
3.78	1.429	0.006	0.002	0.002
3.80	1.429	0.006	0.004	0.002
3.82	1.428	0.006	0.003	0.002
3.84	1.428	0.006	0.003	0.002
3.86	1.427	0.006	0.002	0.002
3.88	1.427	0.006	0.003	0.002
3.90	1.426	0.006	0.002	0.002
3.92	1.425	0.006	0.003	0.002
3.94	1.425	0.006	0.003	0.002
3.96	1.424	0.006	0.003	0.002
3.98	1.424	0.006	0.003	0.002
4.00	1.423	0.006	0.004	0.002
4.02	1.423	0.006	0.003	0.002
4.04	1.422	0.006	0.005	0.002
4.06	1.422	0.006	0.004	0.002
4.08	1.421	0.006	0.004	0.002
4.10	1.421	0.006	0.004	0.002
4.12	1.420	0.006	0.005	0.002
4.14	1.420	0.006	0.005	0.002
4.16	1.419	0.006	0.006	0.002
4.18	1.418	0.006	0.005	0.002
4.20	1.418	0.006	0.005	0.002
4.22	1.417	0.006	0.005	0.002
4.24	1.417	0.006	0.004	0.002
4.26	1.416	0.006	0.004	0.002
4.28	1.416	0.006	0.004	0.002
4.30	1.415	0.006	0.003	0.002
4.32	1.415	0.006	0.003	0.002
4.34	1.414	0.006	0.003	0.002
4.36	1.413	0.006	0.003	0.002
4.38	1.413	0.006	0.003	0.002
4.40	1.412	0.006	0.004	0.002
4.42	1.411	0.006	0.003	0.002
4.44	1.411	0.006	0.004	0.002
4.46	1.410	0.006	0.004	0.002
4.48	1.410	0.006	0.004	0.002
4.50	1.409	0.006	0.004	0.002
4.52	1.408	0.006	0.005	0.002
4.54	1.408	0.006	0.005	0.002
4.56	1.407	0.006	0.004	0.002
4.58	1.406	0.006	0.004	0.002
4.60	1.406	0.006	0.005	0.002
4.62	1.405	0.006	0.005	0.002
4.64	1.404	0.006	0.005	0.002
4.66	1.404	0.006	0.006	0.002
4.68	1.403	0.006	0.006	0.002
4.70	1.402	0.006	0.005	0.002
4.72	1.401	0.006	0.006	0.002
4.74	1.401	0.006	0.005	0.002
4.76	1.400	0.006	0.006	0.002
4.78	1.399	0.006	0.005	0.002
4.80	1.398	0.006	0.006	0.002
4.82	1.398	0.006	0.005	0.002
4.84	1.397	0.006	0.006	0.002
4.86	1.396	0.006	0.006	0.002
4.88	1.395	0.006	0.007	0.002
4.90	1.394	0.006	0.006	0.002
4.92	1.394	0.006	0.007	0.002
4.94	1.393	0.006	0.007	0.002
4.96	1.392	0.006	0.007	0.002
4.98	1.391	0.006	0.007	0.002
5.00	1.390	0.006	0.007	0.002
5.02	1.389	0.006	0.007	0.002
5.04	1.388	0.006	0.008	0.002
5.06	1.387	0.006	0.007	0.002
5.08	1.386	0.006	0.008	0.002
5.10	1.385	0.006	0.008	0.002
5.12	1.384	0.006	0.008	0.002
5.14	1.383	0.006	0.008	0.002
5.16	1.382	0.006	0.009	0.002
5.18	1.381	0.006	0.009	0.002
5.20	1.380	0.006	0.009	0.002
5.22	1.379	0.006	0.009	0.002
5.24	1.378	0.006	0.009	0.002
5.26	1.377	0.006	0.010	0.002
5.28	1.376	0.006	0.009	0.002
5.30	1.374	0.006	0.010	0.002
5.32	1.373	0.006	0.010	0.002
5.34	1.372	0.006	0.011	0.002
5.36	1.371	0.006	0.011	0.002
5.38	1.369	0.006	0.011	0.002
5.40	1.368	0.006	0.011	0.002
5.42	1.367	0.006	0.012	0.002
5.44	1.365	0.006	0.012	0.002
5.46	1.364	0.006	0.012	0.002
5.48	1.362	0.006	0.012	0.002
5.50	1.361	0.006	0.012	0.002
5.52	1.359	0.006	0.013	0.002
5.54	1.357	0.006	0.012	0.002
5.56	1.356	0.006	0.013	0.002
5.58	1.354	0.006	0.012	0.002
5.60	1.352	0.006	0.014	0.002
5.62	1.350	0.006	0.014	0.003
5.64	1.348	0.006	0.014	0.004
5.66	1.346	0.006	0.014	0.005
5.68	1.344	0.006	0.013	0.005
5.70	1.342	0.006	0.014	0.004
5.72	1.340	0.006	0.015	0.005
5.74	1.337	0.006	0.014	0.006
5.76	1.335	0.006	0.016	0.006
5.78	1.332	0.006	0.015	0.009
5.80	1.329	0.006	0.014	0.009
5.82	1.326	0.006	0.015	0.011
5.84	1.323	0.006	0.013	0.012
5.86	1.320	0.006	0.013	0.012
5.88	1.316	0.006	0.012	0.013
5.90	1.312	0.006	0.012	0.013
5.92	1.308	0.006	0.012	0.014
5.94	1.303	0.006	0.011	0.015
5.96	1.298	0.007	0.009	0.018
5.98	1.293	0.008	0.005	0.017
6.00	1.287	0.010	0.006	0.015
6.02	1.281	0.012	0.005	0.016
6.04	1.276	0.015	0.002	0.015
6.06	1.271	0.018	0.002	0.013
6.08	1.266	0.020	0.002	0.013
6.10	1.260	0.022	0.001	0.012
6.12	1.252	0.025	0.002	0.011
6.14	1.245	0.033	0.002	0.010
6.16	1.244	0.037	0.002	0.008
6.18	1.239	0.038	0.001	0.006
6.20	1.233	0.039	0.004	0.005
6.22	1.222	0.040	0.005	0.004
6.24	1.212	0.046	0.007	0.003
6.26	1.201	0.050	0.009	0.004
6.28	1.188	0.055	0.010	0.004
6.30	1.165	0.065	0.014	0.005
6.32	1.154	0.093	0.015	0.010
6.34	1.154	0.104	0.014	0.011
6.36	1.135	0.117	0.017	0.012
6.38	1.121	0.147	0.018	0.016
6.40	1.119	0.182	0.016	0.021
6.42	1.128	0.211	0.013	0.024
6.44	1.135	0.236	0.011	0.026
6.46	1.148	0.262	0.008	0.026
6.48	1.165	0.283	0.006	0.026
6.50	1.182	0.300	0.005	0.026
6.52	1.202	0.316	0.004	0.026
6.54	1.221	0.322	0.003	0.026
6.56	1.232	0.334	0.003	0.026
6.58	1.253	0.344	0.003	0.026
6.60	1.265	0.348	0.003	0.026
6.62	1.282	0.360	0.004	0.026
6.64	1.296	0.362	0.005	0.026
6.66	1.307	0.376	0.006	0.026
6.68	1.334	0.388	0.008	0.026
6.70	1.358	0.385	0.010	0.026
6.72	1.375	0.385	0.010	0.026
6.74	1.396	0.378	0.013	0.025
6.76	1.396	0.373	0.011	0.022
6.78	1.411	0.392	0.012	0.026
6.80	1.440	0.394	0.016	0.026
6.82	1.470	0.390	0.020	0.026
6.84	1.486	0.367	0.023	0.018
6.86	1.487	0.372	0.018	0.018
6.88	1.519	0.374	0.023	0.020
6.90	1.540	0.356	0.025	0.015
6.92	1.553	0.344	0.024	0.014
6.94	1.570	0.339	0.024	0.012
6.96	1.602	0.322	0.025	0.011
6.98	1.616	0.284	0.026	0.007
7.00	1.611	0.258	0.022	0.006
7.02	1.606	0.241	0.021	0.005
7.04	1.599	0.233	0.019	0.004
7.06	1.606	0.232	0.018	0.005
7.08	1.620	0.217	0.020	0.005
7.10	1.624	0.197	0.019	0.004
7.12	1.624	0.178	0.019	0.002
7.14	1.619	0.161	0.018	0.002
7.16	1.612	0.146	0.017	0.001
7.18	1.604	0.138	0.017	0.001
7.20	1.601	0.130	0.016	0.001
7.22	1.595	0.123	0.015	0.001
7.24	1.595	0.118	0.015	0.001
7.26	1.596	0.107	0.016	0.001
7.28	1.591	0.094	0.015	0.001
7.30	1.582	0.085	0.014	0.001
7.32	1.576	0.078	0.014	0.002
7.34	1.565	0.073	0.012	0.001
7.36	1.560	0.076	0.013	0.001
7.38	1.563	0.071	0.014	0.001
7.40	1.558	0.062	0.013	0.001
7.42	1.553	0.058	0.013	0.002
7.44	1.549	0.052	0.012	0.002
7.46	1.541	0.047	0.012	0.002
7.48	1.535	0.046	0.011	0.002
7.50	1.531	0.044	0.011	0.001
7.52	1.526	0.043	0.011	0.001
7.54	1.524	0.042	0.012	0.001
7.56	1.523	0.040	0.011	0.002
7.58	1.522	0.033	0.010	0.001
7.60	1.515	0.027	0.011	0.002
7.62	1.508	0.026	0.011	0.002
7.64	1.503	0.025	0.011	0.003
7.66	1.499	0.025	0.009	0.002
7.68	1.496	0.023	0.010	0.001
7.70	1.493	0.021	0.010	0.002
7.72	1.489	0.017	0.010	0.002
7.74	1.482	0.016	0.010	0.002
7.76	1.478	0.016	0.010	0.002
7.78	1.474	0.015	0.009	0.002
7.80	1.470	0.015	0.009	0.002
7.82	1.466	0.015	0.009	0.002
7.84	1.462	0.015	0.009	0.002
7.86	1.460	0.016	0.008	0.002
7.88	1.458	0.013	0.008	0.001
7.90	1.453	0.012	0.009	0.001
7.92	1.449	0.012	0.009	0.002
7.94	1.445	0.012	0.009	0.001
7.96	1.442	0.012	0.009	0.001
7.98	1.439	0.011	0.010	0.002
8.00	1.435	0.011	0.009	0.002
8.02	1.431	0.011	0.010	0.002
8.04	1.427	0.011	0.009	0.002
8.06	1.423	0.011	0.009	0.002
8.08	1.420	0.011	0.009	0.002
8.10	1.415	0.011	0.009	0.002
8.12	1.411	0.012	0.008	0.002
8.14	1.407	0.013	0.009	0.002
8.16	1.403	0.013	0.009	0.002
8.18	1.398	0.015	0.008	0.002
8.20	1.395	0.016	0.009	0.002
8.22	1.390	0.017	0.008	0.002
8.24	1.386	0.019	0.008	0.002
8.26	1.381	0.021	0.008	0.001
8.28	1.377	0.023	0.010	0.001
8.30	1.373	0.027	0.009	0.002
8.32	1.371	0.029	0.009	0.002
8.34	1.366	0.031	0.008	0.002
8.36	1.363	0.034	0.009	0.001
8.38	1.359	0.037	0.010	0.001
8.40	1.357	0.041	0.010	0.002
8.42	1.354	0.043	0.008	0.002
8.44	1.349	0.047	0.009	0.001
8.46	1.348	0.052	0.010	0.002
8.48	1.346	0.054	0.008	0.002
8.50	1.342	0.059	0.009	0.001
8.52	1.342	0.062	0.009	0.001
8.54	1.338	0.066	0.010	0.001
8.56	1.339	0.069	0.010	0.002
8.58	1.334	0.071	0.010	0.002
8.60	1.334	0.077	0.010	0.002
8.62	1.331	0.078	0.010	0.002
8.64	1.328	0.085	0.010	0.002
8.66	1.328	0.087	0.010	0.002
8.68	1.325	0.091	0.010	0.002
8.70	1.323	0.095	0.011	0.003
8.72	1.320	0.101	0.010	0.003
8.74	1.320	0.105	0.011	0.002
8.76	1.317	0.110	0.011	0.004
8.78	1.317	0.117	0.011	0.003
8.80	1.315	0.121	0.012	0.004
8.82	1.314	0.129	0.011	0.004
8.84	1.316	0.134	0.011	0.004
8.86	1.314	0.139	0.012	0.004
8.88	1.315	0.148	0.011	0.005
8.90	1.317	0.153	0.011	0.004
8.92	1.319	0.161	0.012	0.005
8.94	1.323	0.165	0.011	0.005
8.96	1.325	0.171	0.012	0.005
8.98	1.329	0.175	0.011	0.006
9.00	1.332	0.181	0.012	0.006
9.02	1.338	0.184	0.011	0.006
9.04	1.340	0.187	0.012	0.005
9.06	1.346	0.190	0.012	0.006
9.08	1.349	0.190	0.012	0.006
9.10	1.351	0.192	0.012	0.007
9.12	1.353	0.193	0.011	0.006
9.14	1.354	0.195	0.012	0.006
9.16	1.357	0.197	0.012	0.007
9.18	1.358	0.197	0.012	0.007
9.20	1.358	0.199	0.012	0.007
9.22	1.359	0.201	0.012	0.007
9.24	1.359	0.203	0.013	0.007
9.26	1.358	0.205	0.014	0.008
9.28	1.356	0.209	0.014	0.009
9.30	1.355	0.214	0.012	0.009
9.32	1.354	0.219	0.013	0.009
9.34	1.354	0.226	0.013	0.009
9.36	1.355	0.232	0.013	0.010
9.38	1.355	0.239	0.012	0.011
9.40	1.357	0.247	0.013	0.011
9.42	1.359	0.255	0.012	0.011
9.44	1.363	0.265	0.013	0.011
9.46	1.368	0.272	0.013	0.013
9.48	1.372	0.281	0.013	0.013
9.50	1.379	0.291	0.012	0.014
9.52	1.388	0.299	0.012	0.014
9.54	1.396	0.307	0.012	0.015
9.56	1.406	0.315	0.012	0.015
9.58	1.418	0.322	0.012	0.017
9.60	1.432	0.328	0.010	0.017
9.62	1.445	0.330	0.010	0.017
9.64	1.459	0.333	0.009	0.017
9.66	1.472	0.332	0.009	0.018
9.68	1.484	0.333	0.008	0.018
9.70	1.499	0.330	0.007	0.018
9.72	1.510	0.327	0.007	0.018
9.74	1.524	0.322	0.006	0.018
9.76	1.532	0.317	0.006	0.019
9.78	1.544	0.312	0.004	0.018
9.80	1.551	0.304	0.005	0.018
9.82	1.560	0.300	0.004	0.018
9.84	1.566	0.293	0.004	0.018
9.86	1.574	0.289	0.003	0.018
9.88	1.581	0.283	0.003	0.018
9.90	1.589	0.279	0.003	0.018
9.92	1.597	0.270	0.002	0.018
9.94	1.602	0.265	0.003	0.018
9.96	1.611	0.258	0.002	0.018
9.98	1.618	0.249	0.002	0.017
10.00	1.624	0.240	0.003	0.017
10.02	1.629	0.230	0.003	0.018
10.04	1.632	0.220	0.003	0.017
10.06	1.635	0.211	0.005	0.017
10.08	1.637	0.201	0.004	0.016
10.10	1.638	0.192	0.005	0.017
10.12	1.637	0.183	0.005	0.016
10.14	1.639	0.176	0.005	0.016
10.16	1.639	0.165	0.005	0.016
10.18	1.636	0.159	0.006	0.016
10.20	1.637	0.152	0.007	0.015
10.22	1.635	0.144	0.006	0.013
10.24	1.634	0.136	0.007	0.015
10.26	1.630	0.129	0.007	0.012
10.28	1.627	0.124	0.006	0.013
10.30	1.625	0.118	0.008	0.012
10.32	1.623	0.112	0.007	0.012
10.34	1.619	0.106	0.008	0.011
10.36	1.615	0.102	0.006	0.011
10.38	1.612	0.098	0.008	0.011
10.40	1.608	0.094	0.008	0.010
10.42	1.606	0.091	0.008	0.010
10.44	1.603	0.086	0.008	0.009
10.46	1.598	0.082	0.007	0.009
10.48	1.594	0.080	0.007	0.009
10.50	1.591	0.078	0.008	0.009
10.52	1.587	0.075	0.007	0.008
10.54	1.583	0.075	0.007	0.008
10.56	1.581	0.073	0.007	0.008
10.58	1.577	0.072	0.008	0.008
10.60	1.574	0.071	0.007	0.007
10.62	1.572	0.071	0.007	0.008
10.64	1.570	0.068	0.007	0.007
10.66	1.566	0.069	0.008	0.007
10.68	1.566	0.068	0.007	0.006
10.70	1.562	0.067	0.007	0.007
10.72	1.561	0.068	0.007	0.006
10.74	1.559	0.066	0.007	0.006
10.76	1.557	0.066	0.006	0.005
10.78	1.555	0.066	0.006	0.006
10.80	1.553	0.066	0.007	0.005
10.82	1.552	0.067	0.006	0.006
10.84	1.551	0.066	0.007	0.005
10.86	1.548	0.067	0.006	0.005
10.88	1.549	0.069	0.007	0.005
10.90	1.550	0.067	0.006	0.005
10.92	1.549	0.067	0.007	0.005
10.94	1.549	0.066	0.006	0.005
10.96	1.548	0.066	0.007	0.005
10.98	1.549	0.066	0.006	0.004
11.00	1.549	0.063	0.006	0.005
11.02	1.548	0.061	0.007	0.004
11.04	1.547	0.060	0.006	0.004
11.06	1.547	0.059	0.006	0.004
11.08	1.546	0.055	0.007	0.004
11.10	1.543	0.053	0.006	0.003
11.12	1.540	0.051	0.006	0.004
11.14	1.537	0.050	0.007	0.003
11.16	1.533	0.047	0.005	0.003
11.18	1.527	0.049	0.006	0.002
11.20	1.526	0.049	0.005	0.002
11.22	1.518	0.049	0.005	0.002
11.24	1.513	0.055	0.006	0.002
11.26	1.509	0.060	0.005	0.001
11.28	1.507	0.068	0.005	0.002
11.30	1.507	0.076	0.005	0.001
11.32	1.511	0.084	0.004	0.001
11.34	1.515	0.090	0.003	0.001
11.36	1.523	0.096	0.003	0.002
11.38	1.530	0.098	0.004	0.002
11.40	1.541	0.100	0.004	0.002
11.42	1.548	0.096	0.004	0.002
11.44	1.557	0.095	0.004	0.002
11.46	1.565	0.087	0.004	0.002
11.48	1.569	0.081	0.004	0.002
11.50	1.574	0.072	0.004	0.003
11.52	1.574	0.063	0.004	0.002
11.54	1.574	0.056	0.004	0.003
11.56	1.572	0.047	0.005	0.002
11.58	1.567	0.042	0.004	0.002
11.60	1.564	0.038	0.005	0.002
11.62	1.560	0.034	0.005	0.001
11.64	1.555	0.032	0.005	0.001
11.66	1.552	0.032	0.005	0.001
11.68	1.552	0.030	0.004	0.001
11.70	1.548	0.027	0.005	0.001
11.72	1.546	0.027	0.004	0.001
11.74	1.543	0.025	0.003	0.001
11.76	1.541	0.026	0.003	0.001
11.78	1.541	0.025	0.004	0.001
11.80	1.539	0.023	0.004	0.001
11.82	1.537	0.022	0.004	0.001
11.84	1.536	0.021	0.003	0.001
11.86	1.532	0.019	0.003	0.001
11.88	1.530	0.021	0.003	0.001
11.90	1.530	0.020	0.003	0.001
11.92	1.529	0.018	0.003	0.001
11.94	1.525	0.016	0.003	0.001
11.96	1.522	0.019	0.003	0.001
11.98	1.524	0.019	0.003	0.001
12.00	1.522	0.018	0.002	0.001
12.02	1.522	0.017	0.003	0.001
12.04	1.520	0.016	0.002	0.001
12.06	1.519	0.015	0.002	0.001
12.08	1.518	0.014	0.002	0.001
12.10	1.516	0.013	0.002	0.001
12.12	1.514	0.012	0.002	0.001
12.14	1.512	0.011	0.002	0.001
12.16	1.510	0.010	0.002	0.001
12.18	1.507	0.009	0.002	0.001
12.20	1.503	0.009	0.002	0.001
12.22	1.500	0.012	0.002	0.001
12.24	1.501	0.011	0.002	0.001
12.26	1.495	0.010	0.002	0.001
12.28	1.494	0.014	0.002	0.001
12.30	1.492	0.013	0.002	0.001
12.32	1.489	0.017	0.002	0.001
12.34	1.489	0.017	0.002	0.001
12.36	1.486	0.018	0.002	0.001
12.38	1.482	0.022	0.002	0.001
12.40	1.484	0.027	0.002	0.001
12.42	1.484	0.027	0.002	0.001
12.44	1.484	0.032	0.001	0.001
12.46	1.485	0.032	0.002	0.001
12.48	1.485	0.037	0.001	0.001
12.50	1.491	0.037	0.002	0.001
12.52	1.490	0.037	0.001	0.001
12.54	1.493	0.037	0.001	0.001
12.56	1.493	0.037	0.001	0.001
12.58	1.495	0.037	0.001	0.001
12.60	1.495	0.037	0.001	0.001
12.62	1.497	0.037	0.001	0.001
12.64	1.499	0.037	0.001	0.001
12.66	1.500	0.032	0.001	0.001
12.68	1.496	0.032	0.001	0.001
12.70	1.498	0.032	0.001	0.001
12.72	1.495	0.032	0.001	0.001
12.74	1.497	0.032	0.001	0.001
12.76	1.493	0.032	0.001	0.001
12.78	1.495	0.037	0.001	0.001
12.80	1.498	0.037	0.001	0.001
12.82	1.502	0.037	0.001	0.001
12.84	1.503	0.032	0.001	0.001
12.86	1.501	0.032	0.001	0.001
12.88	1.502	0.032	0.001	0.001
12.90	1.505	0.032	0.001	0.001
12.92	1.505	0.027	0.001	0.001
12.94	1.503	0.027	0.001	0.001
12.96	1.505	0.027	0.001	0.001
12.98	1.506	0.022	0.001	0.001
13.00	1.502	0.022	0.001	0.001
13.02	1.505	0.022	0.001	0.001
13.04	1.503	0.017	0.001	0.001
13.06	1.500	0.017	0.001	0.001
13.08	1.499	0.017	0.001	0.001
13.10	1.498	0.017	0.001	0.001
13.12	1.497	0.017	0.001	0.001
13.14	1.500	0.017	0.001	0.001
13.16	1.499	0.012	0.001	0.001
13.18	1.495	0.012	0.001	0.001
13.20	1.494	0.012	0.001	0.001
13.22	1.493	0.012	0.001	0.001
13.24	1.492	0.012	0.001	0.001
13.26	1.491	0.012	0.001	0.001
13.28	1.490	0.012	0.001	0.001
13.30	1.489	0.012	0.001	0.001
13.32	1.488	0.012	0.002	0.001
13.34	1.488	0.012	0.002	0.001
13.36	1.487	0.013	0.002	0.001
13.38	1.490	0.013	0.002	0.001
13.40	1.488	0.008	0.002	0.001
13.42	1.485	0.010	0.002	0.001
13.44	1.485	0.010	0.002	0.001
13.46	1.484	0.010	0.002	0.001
13.48	1.484	0.010	0.001	0.001
13.50	1.483	0.010	0.001	0.001
13.52	1.483	0.010	0.001	0.001
13.54	1.484	0.010	0.001	0.001
13.56	1.483	0.008	0.001	0.001
13.58	1.483	0.008	0.001	0.001
13.60	1.482	0.005	0.002	0.001
13.62	1.479	0.005	0.001	0.001
13.64	1.479	0.005	0.001	0.001
13.66	1.477	0.005	0.001	0.001
13.68	1.476	0.005	0.001	0.001
13.70	1.474	0.005	0.001	0.001
13.72	1.473	0.005	0.002	0.001
13.74	1.472	0.006	0.001	0.002
13.76	1.472	0.006	0.001	0.002
13.78	1.470	0.006	0.001	0.002
13.80	1.469	0.006	0.001	0.002
13.82	1.467	0.007	0.001	0.002
13.84	1.467	0.010	0.001	0.001
13.86	1.468	0.010	0.001	0.002
13.88	1.468	0.010	0.002	0.002
13.90	1.468	0.010	0.001	0.002
13.92	1.468	0.010	0.000	0.002
13.94	1.467	0.010	0.001	0.002
13.96	1.467	0.010	0.001	0.001
13.98	1.467	0.010	0.001	0.001
14.00	1.466	0.010	0.001	0.001
14.02	1.466	0.010	0.000	0.002
14.04	1.466	0.010	0.001	0.001
14.06	1.465	0.010	0.002	0.001
14.08	1.465	0.010	0.002	0.001
14.10	1.465	0.010	0.002	0.001
14.12	1.464	0.010	0.003	0.001
14.14	1.464	0.010	0.003	0.003
14.16	1.463	0.010	0.002	0.003
14.18	1.463	0.010	0.002	0.004
14.20	1.463	0.010	0.001	0.004
14.22	1.462	0.010	0.002	0.003
14.24	1.462	0.010	0.002	0.005
14.26	1.461	0.010	0.001	0.004
14.28	1.461	0.010	0.002	0.004
14.30	1.461	0.010	0.002	0.005
14.32	1.460	0.010	0.002	0.005
14.34	1.460	0.010	0.002	0.005
14.36	1.460	0.010	0.002	0.006
14.38	1.459	0.010	0.001	0.006
14.40	1.459	0.010	0.002	0.006
14.42	1.458	0.010	0.002	0.007
14.44	1.458	0.010	0.002	0.007
14.46	1.458	0.010	0.002	0.005
14.48	1.457	0.010	0.002	0.005
14.50	1.457	0.010	0.002	0.005
14.52	1.457	0.010	0.001	0.005
14.54	1.456	0.010	0.002	0.010
14.56	1.456	0.010	0.002	0.011
14.58	1.456	0.010	0.003	0.005
14.60	1.455	0.010	0.003	0.004
14.62	1.455	0.010	0.004	0.004
14.64	1.455	0.010	0.004	0.004
14.66	1.454	0.010	0.005	0.004
14.68	1.454	0.010	0.004	0.004
14.70	1.454	0.010	0.006	0.005
14.72	1.453	0.010	0.005	0.005
14.74	1.453	0.010	0.006	0.004
14.76	1.453	0.010	0.006	0.004
14.78	1.452	0.010	0.006	0.004
14.80	1.452	0.010	0.005	0.005
14.82	1.452	0.010	0.007	0.006
14.84	1.452	0.010	0.007	0.006
14.86	1.451	0.010	0.007	0.006
14.88	1.451	0.010	0.007	0.006
14.90	1.451	0.010	0.007	0.006
14.92	1.451	0.010	0.007	0.006
14.94	1.450	0.010	0.007	0.006
14.96	1.451	0.010	0.007	0.006
14.98	1.450	0.010	0.007	0.006
15.00	1.453	0.010	0.007	0.006
